# Supplementary material for: The Major Components of Cerebrospinal Fluid Dictate the Characteristics of Inhibitors against Amyloid-Beta Aggregation
Source: MDPI journal article supplement (doi:10.3390/ijms24065991), 2023-03-22
Supplement: s1 [file s1]

# **The Major Components of Cerebrospinal Fluid Dictate the Characteristics of Inhibitors against Amyloid-Beta Aggregation**

Andrius Sakalauskas \*, Mantas Ziaunys, Ruta Snieckute, Agne Janoniene, Dominykas Veiveris, Mantas Zvirblis, Virginija Dudutiene and Vytautas Smirnovas \*

Institute of Biotechnology, Life Sciences Center, Vilnius University, LT-10257 Vilnius, Lithuania

\* Correspondence: andrius.sakalauskas@gmc.vu.lt (A.S.); vytautas.smirnovas@bti.vu.lt (V.S.)

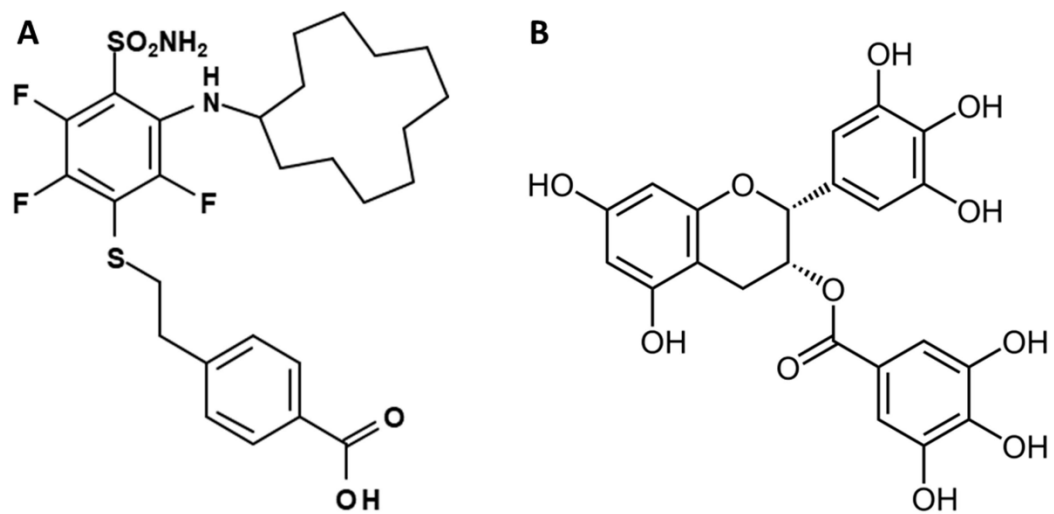

**Figure S1.** Chemical structure of VR16-09 (A) and EGCG (B).

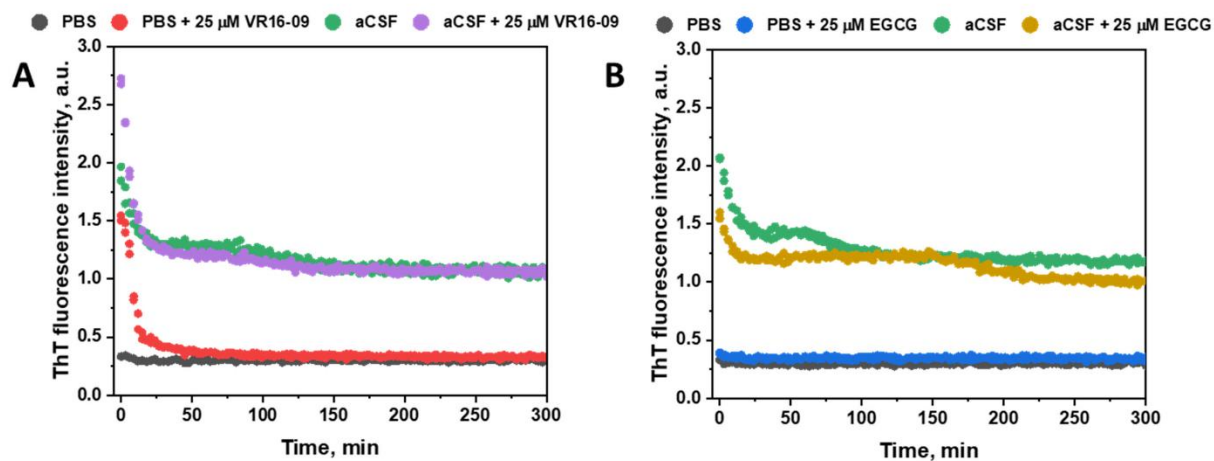

**Figure S2.** Fluorescence intensity curves of VR16-09 (A) and oxidized EGCG (B) in absence of Aβ<sub>42</sub>. The curves are measured identically to the reaction of Aβ<sub>42</sub> aggregation in PBS and aCSF.

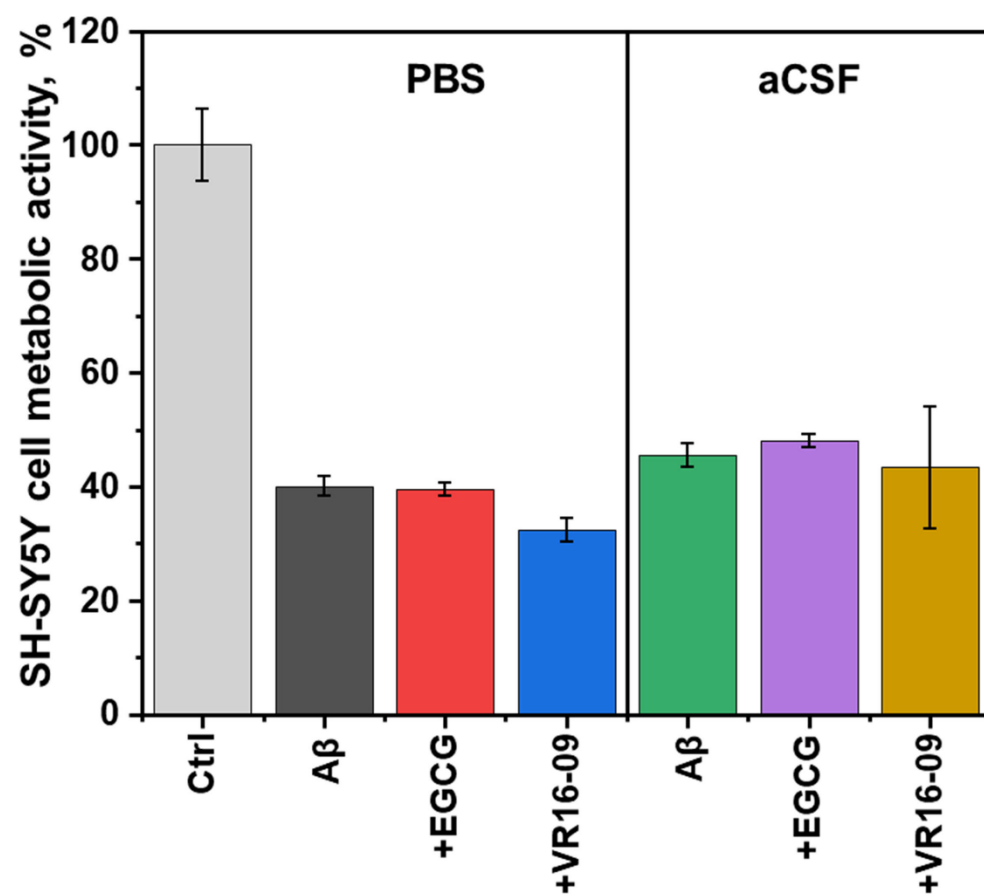

**Figure S3.** SH-SY5Y cell metabolic activity after incubating (48 hours) in medium containing A $\beta_{42}$  alone and with EGCG or VR16-09.

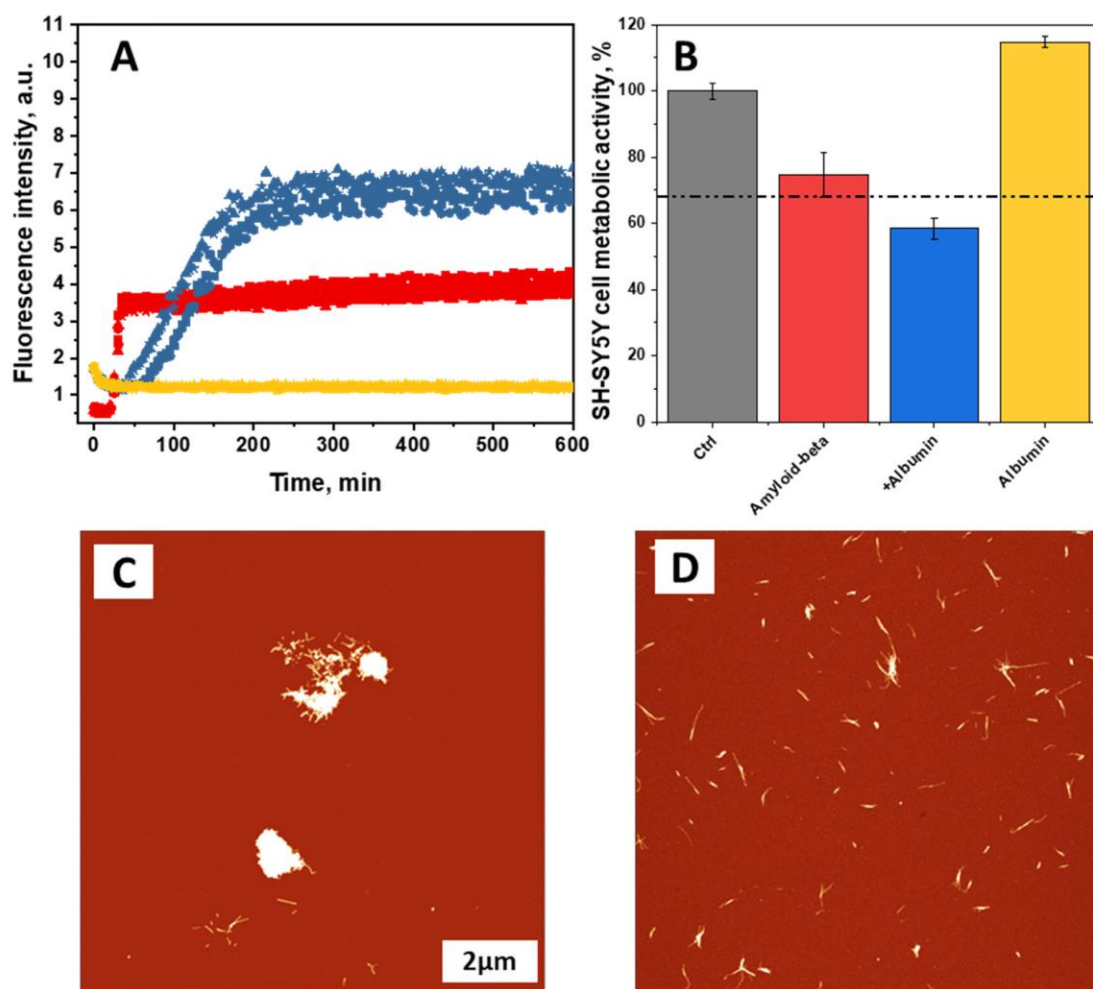

**Figure S4.** 2 μM of Aβ<sub>42</sub> aggregation (A) (Red), 2 μM Aβ<sub>42</sub> + 10 μM BSA (Blue) and 10 μM BSA (Yellow) kinetic curves. SH-SY5Y cell metabolic activity (B) after incubating (48 hours) with Aβ<sub>42</sub> and added albumin or albumin alone. Atomic force microscopy (AFM) images of 2 μM of Aβ<sub>42</sub> without (C) and with 10 μM of albumin (D).

**Table S1.** Halftime value data (in minutes) extracted from Boltzmann sigmoidal fits.

| <b>Figure 1: X0</b>  | <b>in PBS</b>      |       |       |       | <b>in aCSF</b>    |       |       |       |
|----------------------|--------------------|-------|-------|-------|-------------------|-------|-------|-------|
| Control              | 16.8               | 17.3  | 15.9  | 16.4  | 50.0              | 50.2  | 51.7  | 50.3  |
| w/ EGCG              | 36.3               | 35.9  | 33.3  | 34.4  | 32.4              | 32.1  | 34.1  | 34.2  |
| w/ VR16-09           | 19.0               | 18.9  | 16.8  | 18.1  | 115.6             | 117.8 | 108.5 | 106.7 |
|                      |                    |       |       |       |                   |       |       |       |
| <b>Figure 3: X0</b>  | <b>w/o VR16-09</b> |       |       |       | <b>w/ VR16-09</b> |       |       |       |
| Control              | 40.6               | 41.3  | 42.5  |       | 40.3              | 42.2  | 41.0  | 41.2  |
| w/ Glucose           | 37.1               | 36.9  | 41.3  | 40.9  | 56.4              | 54.4  | 51.7  | 55.6  |
| w/ CaCl <sub>2</sub> | 30.9               | 30.9  | 33.1  | 34.7  | 37.3              | 37.0  | 37.5  | 36.5  |
| w/ MgCl <sub>2</sub> | 35.6               | 35.3  | 35.8  | 36.4  | 54.1              | 43.8  | 39.5  | 40.1  |
| w/ Urea              | 36.4               | 37.6  | 36.5  | 38.7  | 48.9              | 48.2  | 43.9  | 47.2  |
| w/ Glutamine         | 138.4              | 153.3 | 132.5 | 142.5 | 279.6             | 356.2 | 288.1 | 258.1 |
| w/ Cholesterol       | 38.5               | 38.9  | 36.5  | 38.1  | 64.5              | 65.2  | 52.7  | 64.3  |
| w/ Latcate           | 39.6               | 38.8  | 39.7  | 39.9  | 46.4              | 41.4  | 58.5  | 46.8  |
| w/ HSA               | 78.9               | 78.6  | 68.5  | 78.2  | 53.8              | 56.5  | 50.9  | 49.2  |
| aCSF                 | 68.7               | 47.7  | 60.5  | 54.6  | 186.2             | 274.8 | 155.1 | 169.2 |
