# Supplementary material for: The Major Components of Cerebrospinal Fluid Dictate the Characteristics of Inhibitors against Amyloid-Beta Aggregation
Source: Int J Mol Sci. 2023 Mar 22;24(6):5991. doi: 10.3390/ijms24065991 (PMC10059578; doi:10.3390/ijms24065991)
Supplement: Supplementary file 1 [file ijms-24-05991-s001.zip › Rawdata.xlsx]

## Sheet: Figure 1
In PBS	Control	Control	Control	Control	w EGCG	w EGCG	w EGCG	w EGCG	w VR16-09	w VR16-09	w VR16-09	w VR16-09			In aCSF	Control	Control	Control	Control	w EGCG	w EGCG	w EGCG	w EGCG	w VR16-09	w VR16-09	w VR16-09	w VR16-09
0	8540	8229	8158	7921	5300	5484	5681	6276	50327	48815	59811	58016			0	28546	28672	27770	28468	25747	26150	25508	26038	36713	37101	36690	34522
3	8405	8227	8827	8532	5402	5601	5243	5968	48945	48266	57327	53450			3	26360	26436	25998	25946	23201	23722	23486	23474	28781	29188	28036	27930
6	8861	8940	9160	9340	5078	5223	5349	5867	43069	41062	47858	45785			6	25011	25264	24872	24111	22347	23389	22360	22037	25610	25752	25063	24385
9	9437	9311	9765	9832	5342	5336	5503	5810	40346	38779	43965	43373			9	24171	24382	23455	23182	21212	22101	21406	20721	23332	24453	23909	23007
12	10948	10922	11942	11632	5338	5319	5141	6019	44172	42525	50034	46713			12	23671	23440	22810	22531	20315	21332	20622	20369	22683	22412	23358	22270
15	16010	15005	20119	18062	5198	4962	5151	5933	51545	48032	55269	54361			15	22550	22851	22392	22001	20011	21062	20407	19832	21768	21703	22576	21773
18	28234	25382	29720	27436	5248	5054	5269	6287	59115	55640	67062	62707			18	22499	22364	22594	21963	20789	20829	20539	19757	20993	21931	22405	21482
21	34980	33237	33936	32477	5373	5141	5577	6234	72128	69025	78272	76815			21	22842	22281	22313	22833	20899	21624	20835	20819	20958	21574	22040	21396
24	36215	34662	35466	34136	5295	5499	5744	6340	81959	78159	80775	88554			24	23424	23072	23733	23325	22225	23516	22304	22317	21420	21324	21742	21308
27	36763	34999	36529	34851	5717	5890	6384	7150	85777	79409	90975	92471			27	24430	23937	24065	23938	24538	25215	24346	23586	21047	20951	21142	21177
30	37161	35759	36281	35943	6284	6104	6950	7467	86027	81100	86072	97530			30	25558	24985	26427	25427	27548	28876	26199	25874	21451	21241	22162	21254
33	37659	38020	38247	36664	7217	7150	7740	8473	89670	81980	87319	93081			33	27298	27618	27704	27934	31065	30991	28440	27340	21341	21188	21642	21230
36	39035	37129	37338	37064	8236	8355	8865	8810	90990	82836	84650	96649			36	30459	29555	30258	28655	33277	33289	30370	29285	21173	21480	22457	21798
39	39257	38214	37503	35705	9094	10112	9853	10024	95269	86838	72752	81367			39	32509	30817	31618	31139	35418	35750	32818	30998	21745	21247	22304	21693
42	37977	37456	37147	37558	10393	10505	10194	10897	94268	86316	71512	80974			42	35398	34621	32775	32494	36493	37387	33783	32830	20873	21267	22432	21301
45	39470	39353	38737	36573	11043	10499	10735	10985	86691	82939	73040	77119			45	38706	36834	34316	33586	37109	36636	34594	33628	21478	21364	22048	21458
48	41088	39222	40009	37674	11292	11864	10282	10781	84302	82499	82912	67051			48	41722	38870	38096	35873	37596	37126	34974	34073	21439	21939	22141	22148
51	40573	41762	40144	38084	11115	11407	11096	11454	87374	78833	75814	76549			51	44162	41444	40032	37682	38078	38541	35677	35664	21254	21237	22381	22103
54	39733	41038	37951	36447	11479	11395	11005	11719	133417	84905	76723	87573			54	47388	44162	41952	39891	38812	37954	37088	35131	22077	21638	22283	21836
57	41811	40444	38712	36743	10988	11650	10404	11257	85350	84162	80024	85841			57	50223	46329	44311	41472	39227	39419	37623	36442	21999	21839	22766	21879
60	43081	40436	39007	35760	11168	11937	10462	11396	100503	80352	97168	108549			60	51431	48605	46464	43119	40429	38774	36537	36184	22271	21305	22096	22283
63	44112	43711	40302	40563	11330	11305	10822	11550	71346	99767	94931	111691			63	51818	50271	47603	45101	40085	39283	37769	35771	22568	21918	22335	22312
66	45036	42845	41657	37696	11854	11168	11165	11533	76212	92440	97482	106789			66	55257	51678	50274	47172	39335	39492	37868	37158	23106	21676	22756	22461
69	44611	44434	39246	37859	11470	12045	10654	11812	84330	83025	85284	96474			69	56424	53135	51732	49099	40112	39631	37752	36463	22437	22357	23538	23027
72	44929	42995	41886	39599	11476	11692	10545	11435	75217	83541	106478	108339			72	58597	55963	53663	49118	39081	40544	38535	36974	22355	23004	24109	22505
75	44886	45616	41350	39422	11832	11658	11224	11361	88077	73814	93076	95091			75	60815	56190	52927	50883	40004	39519	38668	36583	23449	24914	25091	24030
78	43632	46784	42947	38687	11187	11594	10802	11237	82630	64897	93378	90040			78	60037	55711	54403	51108	39683	39264	38211	38516	24027	27008	26377	25726
81	47410	47586	37429	36552	11393	11706	10232	11697	75324	70662	98451	94787			81	63405	58480	55836	53091	39980	40925	38060	37521	25728	27316	29564	28157
84	47097	48209	39112	44504	11580	12057	10726	11600	86441	96801	99811	92574			84	59616	59592	55460	52832	40248	40085	37246	36892	28322	28236	30608	30363
87	46338	44977	42645	41743	11919	11501	10867	11642	84247	73607	92827	90995			87	62684	59312	58450	53578	39899	40697	37927	36592	29326	29897	32248	33032
90	45185	50241	43911	36927	11562	12083	10748	11916	74943	103087	94118	90686			90	62312	59630	57343	53672	40961	39681	38071	36089	31669	30983	34575	33741
93	49523	50020	41222	45409	11085	12232	10823	11828	75589	85605	94168	99004			93	63813	59479	60905	52995	41671	40279	37320	37059	31754	31786	35584	36751
96	47696	51938	40977	38344	11446	12486	10907	11686	81411	96073	89740	85873			96	68593	56084	61234	52952	39303	39281	38266	36948	34230	31446	35956	36725
99	48153	58331	38021	35085	11487	11978	10784	11573	84351	102213	95078	96776			99	66607	61778	60722	55592	39012	40050	37107	36494	34829	33041	37662	39749
102	48109	57889	41434	40157	11904	11547	10606	11377	70433	94976	91176	79486			102	62285	64042	60056	53503	40288	41279	37364	37529	35794	34325	40251	40649
105	43428	61734	43678	39923	11902	12225	10626	11456	70040	88941	96487	91519			105	67964	64742	57964	53008	40838	40551	36035	36798	37426	35180	42887	43287
108	52244	59600	41468	40770	11357	11894	10158	11281	76886	96382	96871	91726			108	66270	56401	61702	55966	41360	40233	37755	35719	39827	36367	45153	45343
111	47917	56083	38204	41400	11180	11755	10870	11172	78395	85727	88700	94151			111	71307	76777	62035	55420	39643	40093	36203	38233	40894	37771	46220	48066
114	40711	61457	33776	49837	11385	11418	10636	11479	73768	95437	88443	94981			114	68824	65268	58077	55602	38975	39725	37251	36361	42216	38127	49658	51257
117	42575	65555	35665	45005	10885	12263	10237	11075	75782	89797	90932	77774			117	61755	66336	63563	54590	38182	39412	38057	36858	44101	39723	52226	54155
120	40403	52294	34432	38924	10496	12117	10153	11458	64789	94225	91197	83532			120	76272	61469	57475	53089	39467	39455	37888	36161	46010	42700	55149	56531
123	42316	61099	31862	39567	10785	12046	9612	10684	66469	92815	96279	87102			123	88382	62733	60143	54273	39564	39168	37688	35962	48152	43929	54958	59358
126	39963	53475	45804	42362	11098	12035	10231	10804	80783	82009	93686	88273			126	65826	67267	57431	54547	38782	39953	37151	35710	48370	46180	58611	60020
129	46907	56814	39846	40268	12542	11551	10248	10850	67149	86895	84265	85507			129	64906	59803	59290	56971	37305	39121	36935	35848	49993	46388	59993	56515
132	40154	57773	34379	44303	12425	11440	10063	10773	70528	85345	94961	93094			132	72413	61107	58848	56468	39172	37261	37779	35696	51776	48699	60851	60498
135	41536	53103	33309	46580	11909	11881	10280	11283	67903	86209	94233	82288			135	61683	72757	60269	55506	37162	37738	36766	35419	52211	52297	62275	65739
138	41385	59307	38590	42126	12163	12378	10089	11129	69115	90745	82830	83683			138	68234	69840	56874	54740	40018	40725	37075	37047	56718	52235	63136	66074
141	40778	59262	32810	44760	11471	11994	9755	11398	68401	87905	84213	96397			141	60152	66522	57183	56002	40594	38351	35801	36531	57253	55065	62556	64244
144	36135	57208	33174	47679	11483	11407	9972	11563	69506	83040	87589	89364			144	67234	61879	60813	55200	39296	38665	35948	35385	61442	55237	65954	61350
147	39899	63785	36817	46216	11953	11103	9600	10889	69998	89934	87776	83664			147	66457	65321	57303	55460	38201	39196	36077	35605	59752	58022	64008	65024
150	40431	62080	35026	46110	11413	11438	9977	11277	73781	81390	86631	89681			150	65779	58708	61979	55109	37921	37189	37606	35638	62389	60160	67543	67084
153	46057	55332	31486	41323	11727	11570	9697	11350	79789	89476	83804	79953			153	64942	75831	58788	55424	37017	39327	37924	33938	63282	60980	69045	69388
156	36693	59478	35969	39529	11837	11793	9584	10880	84446	99893	94546	94503			156	71760	63983	58748	57754	37362	40383	35867	34327	62456	61552	68030	69901
159	36941	66766	34946	41460	12155	12485	9864	11474	93759	92638	93452	88856			159	69406	71612	58947	54106	39275	38889	35373	34337	62100	61463	68077	71287
162	35000	52608	32918	40077	11449	11557	9858	11240	87310	85453	91074	84926			162	66973	65208	58410	53039	38662	38191	36461	35215	64254	60847	70493	67926
165	36605	65238	31215	41996	11788	12160	9468	10744	77252	89063	91785	84010			165	70330	60764	57381	56657	37720	37912	36148	32495	65933	62722	69349	69250
168	42223	63210	30330	41949	12475	11637	9661	11166	89366	88099	89146	83747			168	66634	63081	55542	56567	36236	37726	35830	36095	63877	62395	68711	66676
171	40653	60372	30967	43019	11949	11581	9555	10799	79007	83214	96917	81888			171	66693	59424	60872	55329	35717	35933	34837	35248	62317	62313	72015	68446
174	40963	62588	31132	40807	11583	12583	9643	10728	77336	83401	88598	80755			174	66896	63962	56718	54764	35668	36763	35274	34488	63046	61938	68537	70954
177	42128	75559	31577	41306	12239	12641	9307	11222	83736	89432	87385	81926			177	70073	71844	57939	53722	35008	37788	35205	33586	70706	60297	72546	66280
180	42725	57880	28427	41919	11350	11189	9665	10800	87335	86584	87030	82379			180	65287	61625	57976	55137	37071	39036	35636	35257	64706	62560	69332	71622
183	43148	57497	28924	46961	12566	12477	9418	11201	81947	103667	93244	82136			183	66562	62990	59110	53252	33805	37304	35309	34174	64023	62367	67147	70575
186	34559	56036	27537	40572	11950	11901	9042	11467	88510	89324	92348	89572			186	65269	61377	57536	56106	31654	37097	35617	34895	63994	61104	64731	71937
189	36758	62895	28566	42524	12249	11980	9726	11042	86133	94299	95072	92304			189	63924	61528	60139	58070	32840	35256	34409	34697	64367	61849	68367	65631
192	39822	59477	29389	43946	11988	12183	9393	10778	77520	91838	91479	93031			192	65825	66125	58936	54132	34947	37618	34971	35508	70708	61125	74882	71004
195	35674	59744	33023	46955	11316	11273	9300	10951	81273	91355	87134	87190			195	65608	68119	59273	55846	36907	36261	35422	33369	65814	61784	73020	73612
198	36916	55621	29700	42765	11186	11527	9304	11102	83107	94572	94264	91953			198	65363	61961	59411	56079	34583	36955	35201	34109	68107	62762	67890	67598
201	34645	64021	29312	41521	11348	12353	9126	10541	81453	92770	94250	93887			201	64858	71429	61843	55636	33796	37403	35049	36038	71036	60091	67300	69206
204	36575	55495	30929	45206	11301	11903	9533	10812	82292	94922	92619	94994			204	70316	63247	58880	55879	33784	34661	36984	33527	62998	63277	66789	68869
207	42249	55579	29741	43595	12320	13195	9461	10682	88227	93292	88307	85781			207	66837	74235	58983	53631	32657	35785	35287	34422	62299	64381	68052	69724
210	40103	59732	28713	42281	10758	11743	9430	11077	88224	101227	85190	84747			210	56961	71098	60045	54602	32979	34559	34441	34084	63952	62993	70876	69542
213	38465	55951	28610	41730	11184	12035	9379	10841	89412	96462	88970	95333			213	68632	75732	60131	56871	34117	37180	34300	34314	65785	60719	64302	73885
216	46415	58645	30448	42633	11182	12929	9201	10582	91115	98633	86756	82261			216	66494	68470	60326	56250	33929	35399	34783	33678	62518	64626	63655	73031
219	40601	56059	29814	43777	12787	12458	9152	10838	87116	89017	87004	90419			219	67534	68177	58809	54677	33614	34200	34918	33034	62038	59107	66991	69306
222	38121	58009	31342	45179	11709	12479	9107	10910	81697	91399	89845	83221			222	65047	67026	59734	55824	34121	35261	35632	33164	62559	61758	71517	70269
225	39875	62184	28676	43077	11402	11549	9114	10914	88390	89631	86979	84197			225	61429	66891	60976	55765	33997	33532	34995	33682	67129	60495	65380	74796
228	41111	56220	30605	45670	11191	12497	9347	10425	86087	88873	94685	89186			228	63861	66257	59757	56083	33593	33450	34662	32560	64821	60572	66917	68930
231	37699	53963	28438	45941	11869	12870	8993	10239	85832	91112	95181	99162			231	73916	67134	61908	57703	35490	32342	35118	31873	61938	60441	66840	68416
234	39179	59259	28376	42269	12044	12125	9650	10410	84262	95403	84533	86385			234	67701	70852	60611	57109	36310	34983	33751	34064	64259	61445	64316	68557
237	38226	53375	28191	40802	12232	13028	9621	10769	88117	96867	95657	92453			237	66245	73289	60187	55916	34552	33051	34605	33794	64960	59977	66584	73190
240	40536	61786	29738	43837	11302	12884	9131	10735	88222	95106	88173	86011			240	63238	66147	60508	56160	33094	35894	34387	32611	64889	59004	68078	76713
243	44883	62268	30681	41471	11103	13352	9119	10523	79927	83347	94483	85221			243	60099	66239	59818	58019	33059	34117	34344	33029	68291	62577	65853	68824
246	40888	57644	27946	42948	10602	13738	9370	10539	90145	99770	93128	93868			246	64967	68612	59717	56490	32747	34630	34984	32956	63896	57840	78820	73229
249	45885	59484	28177	40605	11227	13042	9281	10374	88248	88006	112048	93835			249	65685	67348	61333	57646	33734	33002	34893	32977	66839	57346	72865	75491
252	41797	57945	26204	41117	11891	13425	9317	10740	85893	93806	99445	98734			252	64686	71085	59698	56592	31826	33408	34545	33835	65995	58564	64972	73183
255	42967	57041	26617	42027	10945	12244	9060	10219	86070	100872	105824	92488			255	63020	72269	60419	57381	32407	32762	35061	32987	62355	60527	65279	65728
258	43530	59528	27328	43498	10962	13679	9179	10596	89970	89774	94163	86538			258	62010	66539	61024	57635	31764	32993	34635	32874	64225	59148	68485	71586
261	43285	57837	28056	44726	11353	13167	8905	10353	80846	97828	98815	86893			261	60781	70835	59948	57021	30926	33889	35445	32511	61272	61073	61119	69632
264	39931	57270	26156	42961	10870	12973	9112	10234	82782	96048	101356	92769			264	66407	71236	61436	57435	32848	33350	34116	32730	64298	60189	69010	67904
267	40429	58326	25498	40327	10860	13703	8783	10463	85358	100155	101717	93165			267	68058	70704	60196	58391	32285	34160	34592	32724	64546	60331	66183	67476
270	41031	57745	27825	44123	11528	13020	9327	10922	84675	95847	93242	87388			270	62258	69505	58554	57226	31575	32089	34944	32990	62573	58393	63779	71627
273	43361	59484	28495	45573	11566	13241	9175	11009	83319	96569	97148	85936			273	65501	68653	59203	57737	31362	33320	35222	33315	59305	65385	65464	66423
276	41011	58634	26367	42700	11660	13193	8983	10707	91311	103954	100719	96597			276	67800	74037	62263	57927	32030	32335	35362	32543	64098	62187	65525	68388
279	41296	61447	27512	45240	12199	13369	9047	10794	83410	93913	97026	84240			279	67145	69365	60694	56775	31878	32738	34787	32546	62464	60270	63283	70136
282	41060	57867	27497	45347	11604	13348	8987	10561	81832	94136	103306	92662			282	67195	70509	61561	56222	31652	33167	35364	32972	69420	62823	67740	78024
285	41401	56913	27248	43206	11513	13096	9147	10088	87224	98624	104230	92253			285	62982	72307	61513	58454	32360	31646	35334	33434	61713	58225	63127	71146
288	43413	59118	27695	45468	11863	13164	9191	10378	86382	97506	101082	89535			288	60858	69011	61238	55512	30829	31785	34868	32149	62094	58752	70605	68174
291	42176	58558	26967	44569	11473	12353	9346	10503	87721	101716	109100	97213			291	65063	68848	61658	57533	31943	32879	34967	32397	67952	61937	64021	73007
294	42505	60975	28539	43538	11830	12778	8965	10247	85225	88770	101311	86965			294	62051	67258	61946	55943	32206	32052	34224	32632	64649	59596	68055	66747
297	41351	57445	27119	42953	10944	11982	8879	10222	87056	99670	105857	95493			297	64751	71055	61558	57643	31836	32397	34891	32567	66242	60712	67525	67923
300	43459	60455	27606	43050	11482	12457	8877	10637	86466	92018	97434	89656			300	64015	67736	62527	56236	31639	31701	34384	32975	63908	58947	64631	72918
303	43810	60490	27035	43319	11660	12941	8614	10316	80907	94174	97636	84338			303	59390	66674	60795	55849	31078	31387	34460	31551	61046	59850	66681	68865
306	40739	57555	26324	41487	11299	12164	8754	10273	89151	108819	105978	96481			306	65051	68475	60980	57734	31564	32029	34783	31786	63554	62519	63499	69515
309	40445	60628	27688	42138	11876	13107	8590	10085	87945	90190	118075	97447			309	60258	68059	62092	57878	30695	31561	34574	32645	59552	59796	64470	67220
312	42714	61373	25697	44615	11223	13001	8695	10456	85643	94580	104014	86739			312	62308	67995	60929	56318	29565	31645	34746	32352	61845	60734	65369	69515
315	43639	59808	26456	45462	11041	12573	8518	10163	89343	90435	103683	90201			315	60613	67627	59873	56706	30581	30938	34662	32352	62127	61635	64436	68928
318	41278	56297	24489	41648	11497	12520	8833	10139	85880	98650	114617	99032			318	64592	68672	61784	56812	31174	31413	34888	31552	64698	61377	63583	71505
321	41456	57653	27375	46234	11413	13334	9064	10599	92078	92059	102609	92831			321	59773	68708	60207	56837	31262	30913	34065	32419	61788	60137	66363	69676
324	43247	57504	26255	44546	11603	12912	8398	10272	82440	88347	104818	95220			324	62417	67301	61496	57390	31418	31419	34129	32112	66690	61158	68373	74099
327	41494	56562	24470	43830	11203	12414	9124	10616	82176	100482	112729	98998			327	62180	69686	61722	58443	30737	31303	35042	32912	62592	60052	62727	73262
330	42784	60547	27340	44435	11406	12163	8295	10172	84323	95498	99986	92357			330	61561	68433	61305	56923	31040	30535	34760	31741	59483	59999	64129	67279
333	41624	58747	26656	44671	11280	12717	8855	10015	85235	91453	102142	92736			333	62263	69439	60799	57101	30361	31539	34774	31898	60445	59705	64127	67472
336	43482	58393	24877	43739	11124	12745	9056	10373	85987	97081	106195	95641			336	60174	67785	60736	58073	30311	30612	34847	33439	66615	59373	65932	66124
339	41412	56889	26996	44123	11535	12538	9050	10826	83812	87642	101859	91413			339	61956	67794	59962	57682	31218	31475	34714	32314	62607	58762	63455	68234
342	44780	59054	25848	44379	11661	11911	8822	10446	85579	89968	98313	90033			342	62135	67237	59899	58225	29864	31180	34407	33355	63149	61393	63518	68759
345	41763	59621	25989	46053	11353	12654	9206	10320	83022	92179	100809	92364			345	62903	68989	61303	57109	31061	30374	34023	32776	60018	60991	62601	70934
348	42193	55579	24523	42405	11665	12356	8880	10286	83277	97477	107401	99089			348	63722	70750	61165	58841	30456	30262	34372	32440	62723	58053	65498	67826
351	41843	58008	26468	44208	11707	12705	8385	10232	83643	89512	102088	90949			351	62129	68011	60661	56483	30825	30935	33492	32604	63281	61378	62796	69201
354	42176	56964	23653	43078	11421	13009	8793	10104	88768	96792	108832	98609			354	62498	71859	62173	58078	30024	31366	36016	32272	60961	58666	66008	71392
357	42078	59210	25680	41748	11560	12815	8683	9992	83346	97379	109103	100046			357	64441	71093	60833	58857	30191	30806	33898	32163	60051	60751	64305	71125
360	41178	58308	24270	41921	11536	12912	8516	10016	84095	98804	109943	97859			360	64193	68919	61701	57574	31531	30698	34852	33157	66905	58684	62017	70029
363	42122	56919	24919	42842	11624	12670	8667	10354	84306	92081	109000	101715			363	64885	72237	62381	58049	30350	31446	34275	33825	60068	58872	63051	70761
366	42767	59084	25192	44036	11787	12729	8766	10156	84648	88047	102685	95185			366	61403	67910	62410	57964	30815	31623	35033	32398	63989	60719	63948	70037
369	41072	57182	26048	40711	11416	12221	8571	10214	83901	98983	113161	101984			369	63772	69784	62144	57339	29606	30206	34682	32460	62710	59654	61528	69923
372	41422	59821	25879	41238	11740	12315	8477	9987	82766	101000	111628	99621			372	64368	69968	61893	58856	30607	31679	35266	32126	62318	58277	63507	69016
375	41908	60145	27453	44043	11820	12341	8923	10024	84089	91150	101104	92306			375	61728	68870	61278	56926	30673	30605	34936	32311	59895	58195	62279	67793
378	41819	59313	26637	43991	12014	12620	8252	10097	83357	93831	101505	91420			378	61036	67809	60667	57966	30819	30513	34180	32044	61910	58674	61013	68466
381	43219	60435	25991	43246	11682	13459	8418	10495	85059	89992	103278	90999			381	65227	67501	61834	58117	30268	30382	34551	32058	65706	60845	65489	68888
384	41626	57755	24501	41851	12143	12911	8436	9848	86061	97772	116107	103526			384	64198	71537	61634	58712	29971	30333	34560	32156	60755	58931	62520	66689
387	40029	58555	23733	42467	12428	12613	8636	10493	84566	97168	112329	101043			387	65134	72549	60942	59163	30751	31139	34625	32480	60581	58566	63186	67781
390	42015	60446	25234	44832	12152	12645	8515	10002	87199	90308	103586	89028			390	65780	70363	61069	57028	31126	30444	34947	32183	59645	58618	63069	68191
393	43210	61367	26637	42968	12039	12273	8641	10126	82372	92232	103241	89206			393	62497	69504	61481	57234	30780	30904	33767	32171	62409	61142	62261	67604
396	41842	61342	25900	42070	11746	12391	8923	10395	84937	92623	102419	92088			396	62462	69954	62064	57687	30490	30138	34890	31508	61780	59706	61705	67236
399	42225	61664	25329	45198	11670	12758	8801	9886	84439	88760	101873	89229			399	62207	68389	59887	57620	31399	29903	34727	32206	61340	59782	61704	65974
402	41483	58384	24139	41209	12414	12415	8641	10004	87148	96678	108689	98002			402	65382	69583	63337	59349	30891	31505	34400	32939	61239	58551	62161	68387
405	43558	60018	25847	43855	11269	11917	8325	10450	85437	88239	102626	87890			405	61320	68784	61755	57760	30233	29580	34331	32620	61092	59337	64235	68596
408	41927	62178	25798	43477	11507	12663	8225	10261	84793	87847	103244	88126			408	61788	68974	60896	57302	30181	30303	34713	32411	58986	58843	63612	67513
411	41050	58803	25381	41772	12124	12017	8500	9873	89427	97856	116993	97880			411	65314	71504	61952	57705	31273	30628	33895	32640	67859	57797	62360	67212
414	42879	58959	25793	43170	12375	12238	8225	10480	89486	93102	102490	92749			414	62378	68889	59724	58057	30480	31095	34400	32110	61268	59422	61556	66432
417	41278	60840	26227	44131	11776	12457	8269	10162	82160	87882	100847	91756			417	63712	70749	61310	57763	30177	30256	35369	32189	60960	58406	61660	67896
420	41166	57935	25202	41769	11877	12116	8399	10124	85179	93763	118838	99307			420	65702	69232	62490	58879	29825	30371	34612	32058	61775	58504	62005	70525
423	42444	59907	25970	44595	11933	12708	8573	9949	84566	90024	105870	90908			423	61342	66887	61063	58206	30957	30448	34967	33120	58585	59620	63358	67125
426	41598	59186	26153	44670	12038	12165	8790	10330	86194	90275	105258	89333			426	62847	68762	61503	58069	29738	30460	34639	32328	61442	58660	62326	66993
429	41960	58260	24419	42266	12032	12333	8699	9588	86925	98644	115895	99834			429	64205	71543	61138	59017	30821	30057	34059	32501	62737	58446	61350	70596
432	41767	61943	27985	43881	12167	12264	8489	10083	84617	81202	115496	91727			432	60254	66023	62250	58850	31347	30047	34088	32276	57946	58282	62461	69005
435	41947	59250	25458	44335	11772	12635	8592	9831	91420	88816	105580	91022			435	61475	69311	59867	57409	30875	30397	34545	31923	59624	59902	62592	68562
438	41661	59216	25201	43254	12208	12402	8436	10128	86698	92463	105154	91247			438	60797	68793	62551	57796	30655	31327	34714	32380	60556	59081	62914	69943
441	42641	60092	25483	44149	12242	12264	8207	10739	88738	90586	104574	90612			441	63449	67850	60561	58188	30231	30440	35125	32032	59164	58997	63273	65763
444	41139	57344	23331	41573	12175	12032	8748	10163	86749	99207	112277	98062			444	64175	70719	61869	59111	29926	31044	34268	32769	60933	58629	62717	68587
447	41482	59671	24422	41839	12109	11946	8253	10479	88622	97191	113957	98981			447	65985	71465	63217	59076	29667	29641	34607	32716	60800	58934	61633	68431
450	42182	59506	25397	45078	12368	12659	8622	10292	85814	89033	104320	93319			450	61138	69297	61174	58098	30339	30988	35097	32396	59317	58831	62394	68790
453	40441	58334	25185	41782	12092	12356	8851	10348	90885	98668	114975	99927			453	65669	72859	62352	58313	29524	30379	35301	31593	59282	59778	64860	68499
456	43238	60261	25125	42305	12007	12013	8273	9981	87536	93874	107630	91185			456	60280	67028	62548	57408	29445	30718	34829	32346	59963	59685	63414	67691
459	42389	59875	25771	44400	11665	12155	8255	9561	86493	92405	106382	94158			459	61123	68585	61484	58312	30731	29946	34237	32670	61181	60823	61816	65941
462	40890	57807	25359	41060	12067	12470	8460	9770	86920	95678	115809	99151			462	64399	70739	61581	59066	30700	30373	34937	32002	58334	58758	61851	66432
465	41781	58727	24852	43328	12458	12000	8776	10190	85277	92634	111838	90958			465	62966	68720	62362	58588	30027	29022	34562	32669	58409	58968	62947	67517
468	42139	57873	26555	44496	11632	12054	8353	10288	85430	88927	104658	92566			468	62574	70823	60716	57391	30774	29531	34121	31961	59558	57900	63667	66774
471	40682	58592	23778	41093	11985	12790	8622	10004	89527	95128	111164	99714			471	64958	72589	61836	59009	29994	30609	34618	32887	59325	59835	62337	68693
474	40387	59537	25302	41673	11667	12080	8411	9725	88370	86802	126203	101659			474	62090	69900	63314	59904	30791	29920	35179	32507	59634	59533	63169	69057
477	40389	60949	25577	41271	11761	11880	8316	9666	86224	87847	124110	99825			477	61087	68326	64199	59868	31169	29920	34738	32616	58220	59812	60708	67830
480	43456	59510	25152	44400	12022	12413	8405	9988	89050	89022	104904	91065			480	61940	68608	62608	59644	30056	29383	34967	32242	59513	58711	61160	66341
483	42249	59183	25659	43878	12007	12293	8393	10181	86087	90863	103521	90610			483	63127	69532	61115	59914	30687	29698	34602	32366	61498	59155	60699	67527
486	41735	58045	23687	40556	11567	12320	8501	10289	89502	96123	118305	99605			486	64715	72097	62816	59681	30120	30113	34519	32631	58157	59294	62126	68313
489	43462	56678	24260	42001	11871	12018	8434	10231	92052	96709	120131	100228			489	63397	71070	63444	59785	30137	30580	34297	33062	62471	58338	61416	69072
492	41787	59034	25521	44146	11752	12322	8306	9881	91167	89551	107432	94415			492	61873	68030	61418	59257	29814	30118	34418	33218	60588	59631	62301	67082
495	42297	58425	25715	43841	11874	12584	8252	9841	84717	90040	105542	91329			495	60058	67992	61666	58580	29914	30297	34402	32909	59788	59508	60680	67142
498	41817	60491	25297	42771	11844	12211	8100	10308	85984	88421	107302	91523			498	62537	70388	61194	59068	30793	29850	34591	31890	59117	58396	62719	68423
501	42165	59244	25574	43765	11324	12290	8599	9694	84871	89486	107922	90453			501	63742	69991	61163	57157	30243	29732	35387	31784	58629	60321	62338	68348
504	42565	59541	25364	43635	12098	12043	8117	9997	86444	90238	105677	91257			504	59824	70130	62140	57434	30533	29749	34466	32449	58570	59666	61953	65885
507	41515	61397	26950	43545	11881	12222	8073	10266	79830	80959	118798	94356			507	60285	65009	63432	59156	30029	29969	35074	32300	59126	58446	62757	70297
510	41101	60706	27095	43988	12147	11806	8349	9909	84511	86764	114621	92947			510	58913	64133	62924	59378	29542	30558	34362	31800	59257	58869	62720	69142
513	42450	59213	25572	43328	11606	12185	8139	10009	87646	88566	104717	92098			513	60535	67673	62055	57803	30156	30732	34554	32143	59569	59171	61351	67293
516	40895	56586	23703	41164	12209	11928	8530	9835	89449	95361	117075	101346			516	64577	72333	63720	60605	30814	30268	34578	32144	60168	58272	61909	67640
519	41766	57053	23320	41609	11772	12291	8496	9614	88251	94670	115664	100260			519	62710	72138	61794	59442	30286	30017	34275	32908	60178	58501	63097	67261
522	41594	58252	23396	41354	11816	12187	8249	9774	91633	97792	117610	101629			522	64537	72659	62447	59589	29638	30254	35643	33419	60434	59086	61490	67926
525	41824	59518	25241	44113	11893	11872	8327	10222	86786	94020	108976	92777			525	60779	70611	61097	59541	29901	29989	34960	33318	61396	58766	61746	71114
528	41312	57244	23660	41678	11660	12609	8422	10172	86626	95119	117544	99372			528	66029	71044	62449	60038	30386	30443	34756	32819	60745	57750	62039	68190
531	43163	59706	24482	42307	11845	12110	8425	9919	88537	87941	109377	91921			531	62624	69729	61118	58730	29721	30091	33810	32242	59660	59253	61323	66504
534	40588	56555	23902	42038	12073	12512	8543	9897	86156	94709	120991	101667			534	64246	72649	62346	59973	30198	30303	34848	32102	58997	58305	61746	67750
537	41426	62074	26717	43597	12000	12265	8377	9865	85886	83835	120819	95751			537	60028	66554	63083	60255	30131	29679	34714	32838	58902	58147	61553	70474
540	43090	59531	25121	44066	11846	12114	8402	9864	89133	87400	110136	92680			540	60780	66686	61406	58936	30052	29292	34336	32364	58931	57336	60925	66619
543	42914	60043	25478	43134	11675	11791	8126	10219	87291	89280	111434	91699			543	61673	69862	62448	58736	29357	29595	34902	31411	59911	58079	61731	65784
546	42124	60187	24419	44650	11538	12201	8092	9901	84192	92193	109147	91770			546	60932	70268	62126	58423	29578	30254	34786	32649	59628	58403	62035	67078
549	41248	60530	25169	43154	11791	12014	8369	9977	83391	88567	111710	92542			549	61256	69639	61092	58710	30033	30307	34677	32074	59305	58171	61643	68123
552	40453	57990	23414	41494	11733	11806	8367	9841	89177	95509	120173	100383			552	62895	72734	61494	59574	29699	30470	34949	31748	61989	59010	61395	66011
555	40957	59164	25313	44265	11834	12136	8339	9443	87119	87845	110834	91876			555	60035	68435	63136	58948	30034	29419	34084	32004	57979	59044	61235	65696
558	42638	59413	24968	43581	11940	12465	8745	9755	86447	90008	112239	88807			558	61430	69893	62281	58707	29891	30232	34605	32328	61466	58290	62828	68037
561	40646	59765	23521	41901	11704	11792	8244	9323	89876	92973	119785	100994			561	63645	72356	62250	59769	29577	30304	35255	32424	58949	59048	61069	67230
564	39211	61179	26203	41996	11223	12394	8299	10158	90066	85310	128366	102182			564	59652	67462	62658	59953	30516	30293	34982	32303	58927	58123	61860	67575
567	41893	60251	25621	43536	11699	11977	8471	10060	89119	90554	112041	92510			567	60644	69586	60651	57567	29496	29687	35703	32712	58635	57942	60940	66773
570	41448	60266	25332	43972	11767	12112	7975	9662	92870	88628	112985	92133			570	62796	69468	61920	59756	29560	30223	34481	31903	60533	57894	61781	67111
573	42048	59476	24982	43020	11957	11654	8161	9630	87920	89914	113620	91789			573	61893	69006	62476	58909	30545	29912	35464	31964	61397	58725	61331	67817
576	40286	57420	23563	41593	12193	11636	8684	9697	95822	93065	121666	99650			576	63119	72108	62416	60140	30539	30215	34769	33130	58666	58023	61633	66991
579	42786	59724	25266	43560	11787	11488	8137	9758	93095	88025	114367	94129			579	62209	69391	61587	58330	30089	30627	35125	32372	61207	59975	61815	67386
582	41990	60705	24945	44031	12197	11922	8023	10357	90616	85229	112138	92721			582	61814	69908	62076	60231	29825	29626	34378	32646	59628	57671	61695	67759
585	42726	58811	24981	45156	12159	12148	8061	9495	91930	86799	112891	92358			585	61666	68352	62885	59005	30557	30189	34523	33196	60271	57077	61917	65970
588	40308	59017	22887	40945	11305	12236	8032	9898	97606	93039	119650	100891			588	64004	71835	62119	59320	29824	30077	35247	32176	59089	58268	60659	67635
591	41844	60683	24850	44139	12117	11847	8206	9690	89953	88966	110417	91454			591	61504	69423	61924	59209	29973	30540	34737	32072	59549	58518	61673	67488
594	42972	61615	25379	42820	11595	11880	8362	10007	94536	86778	114152	91623			594	61183	69182	61352	59663	29833	30224	35039	31947	59218	59604	62459	68636
597	42029	58789	24619	42870	11804	12311	8542	9798	92614	86836	112170	94478			597	60410	69267	61647	60040	29751	30050	34620	32823	58756	59283	61178	68683
600	42602	59060	24570	43463	11766	12118	7954	9996	96269	88085	113345	94250			600	59727	68038	62182	57893	29845	29793	34429	32624	59730	59634	62567	66208
603	42033	59875	25672	44465	11835	12146	8229	9457	88560	89412	111863	90158			603	60795	69190	64012	60201	29910	30220	35155	32934	58123	58674	62756	67859
606	41174	57939	23096	41917	11450	11980	8410	9856	93937	93397	120171	100763			606	62780	71777	63195	59551	29154	30370	34403	32724	57484	58525	61544	66740
609	41508	59604	25300	43059	11718	11563	8161	9802	89754	86949	113652	89932			609	60826	69966	63886	57608	30517	29919	34533	32416	59137	59022	61688	67181
612	39946	62550	27496	43470	11588	12349	8100	9678	89970	81278	120080	91483			612	59714	64239	64928	59838	30029	30130	34348	32405	57927	58364	62344	67356
615	42377	58971	24972	43989	11777	11601	8303	9861	92266	87185	112880	91157			615	59700	70489	62910	59004	30382	29943	34996	32841	58937	59156	60079	67767
618	40646	57823	23578	41817	11764	11445	8396	10229	93624	95846	123375	99605			618	64425	72465	62661	60029	29876	30636	35231	31641	60178	58391	61746	68908
621	43054	60884	25450	43527	11460	12101	8379	9980	92096	88685	115847	92101			621	60526	69874	62680	58625	29991	30504	34648	32476	58215	58795	62340	70152
624	41978	59760	25345	44208	12160	11807	8264	9869	92099	90361	116064	92009			624	61055	69468	63336	59463	29520	30043	34953	32690	58911	59138	61170	67621
627	40074	58104	22990	41903	11695	11877	8235	10096	94457	94316	123458	99854			627	63838	69606	63613	59118	29101	29875	35143	32297	58582	57153	62003	67496
630	41226	59937	23830	42291	11375	12043	8493	9398	91935	91890	122183	99089			630	62509	71054	64393	61247	30320	30794	35061	31892	57957	57859	60639	67357
633	39053	59374	25001	41210	11295	11996	8590	9603	92519	85242	131971	103200			633	61209	68533	65047	60905	29871	29558	35511	33098	58087	58685	62630	65879
636	40918	57435	23127	41947	11623	12171	8267	9946	93984	96350	121369	99858			636	63021	69629	63875	60444	30257	30193	35289	32629	59199	57887	60620	68198
639	41647	61340	25416	43210	11989	11878	8386	10027	93547	86861	115686	91923			639	61061	68486	62177	59486	30381	30448	34784	32168	60064	58038	61479	66864
642	42534	60586	24626	44130	11733	11678	8095	9733	88804	85899	112284	90692			642	61622	68461	61910	59464	29904	30604	34540	32133	58674	58995	60821	66369
645	41194	59740	24936	44505	11948	11898	8163	10060	87797	88144	112805	91349			645	61997	69952	62191	59603	29711	30530	34902	32128	59055	58769	61522	67172
648	41244	60712	24949	43915	11482	12064	7934	9751	88671	84080	113488	91635			648	61218	69266	62366	58944	30012	29874	34904	32677	58346	58523	60552	65422
651	40477	59010	23401	41703	11477	12102	8186	9515	93343	98069	124003	98513			651	61891	73621	62737	60516	29134	29600	35269	32715	60461	59457	60474	67563
654	41305	58254	23283	41274	11317	11995	8287	9456	92485	92735	123570	99894			654	63356	71805	62169	59865	29833	30856	34181	31821	59411	57248	62057	67920
657	40922	60350	24204	44479	11525	11959	8188	9765	92571	88150	113528	90649			657	60578	68476	61774	59182	30022	30008	35213	32141	60295	58234	60566	65160
660	40651	58563	23384	42115	11560	11868	8485	9396	93885	94020	126200	100496			660	63004	71541	62856	60619	30088	29579	35023	32719	57861	58127	61355	68018
663	42742	59852	24539	43479	11756	12414	8524	9564	90659	85218	115283	90287			663	61168	68801	61697	57937	29687	30250	35452	32415	59047	57417	59715	67061
666	41547	57400	22890	41793	11630	12093	8176	9342	94514	91557	125552	101920			666	62098	72059	63105	59655	29359	30136	34937	32459	58881	58210	60916	68757
669	40897	58460	23044	41418	11492	11611	7951	9606	92432	94419	124947	99682			669	61888	72051	63081	60638	30489	30327	34816	33337	59288	58380	61815	66658
672	41941	58206	24823	43988	11776	11914	8088	9902	90715	88215	116375	92496			672	58979	70266	63356	58326	29628	30668	34478	32764	58401	57968	61697	67356
675	40674	56358	23024	41806	11630	11783	8153	9746	94878	93216	125120	102401			675	61502	71238	63277	59671	29331	30066	34726	32784	57486	57898	60396	67848
678	40537	58511	23678	40987	11682	11831	8122	9366	94150	97039	123944	100893			678	60780	71059	63479	59397	29316	30387	35570	32636	58717	57908	60816	66572
681	42566	60334	24684	44604	11588	11684	7903	9482	90829	88017	115977	90321			681	60449	68543	62051	59169	29821	30223	34491	32405	57974	57336	60817	66394
684	41556	59884	24541	44833	11357	11792	8260	9726	93415	89758	114582	91622			684	59590	69471	63074	58673	29666	29715	34630	32213	58350	58470	59862	67506
687	41392	59934	24292	43885	11673	11578	8001	9921	90752	89175	115748	90933			687	62529	69315	61745	59233	30224	30051	33878	32459	58367	57833	60173	67368
690	42158	60352	24357	42778	11599	12119	8247	9474	93219	88233	115516	91518			690	61692	67380	60939	58590	29676	30332	35455	32435	59150	57600	60688	66829
693	42049	58791	25150	44536	11705	11582	8211	9750	90557	87426	114164	90742			693	61025	69632	61537	59463	29968	29829	33971	32401	58981	58733	60568	65604
696	41402	60098	24679	43922	11445	11783	7939	9525	95487	89604	117688	93000			696	61178	69148	62115	58412	29923	29989	34798	32749	57572	58316	61896	65238
699	41790	60249	24712	44257	11550	11573	7990	9505	91790	88895	114660	91499			699	59749	69604	61609	59268	30047	30657	34915	32728	58501	57392	61462	67554
702	41876	60066	25038	43885	11471	11714	7941	9970	93440	87360	114457	90886			702	61731	70338	62610	59214	29746	29124	35007	32163	59433	57138	61259	65542
705	42010	58820	24807	43479	11984	11574	8064	9634	91807	86318	115910	90610			705	61355	69386	62389	59109	30431	29947	34733	32415	58391	57810	60796	67197
708	40802	62045	26131	43293	11458	11797	7961	9786	89670	80573	124644	92618			708	60131	65602	63376	59301	30904	30344	34417	32560	57496	58813	61457	67351
711	40755	63542	27077	43391	11672	11607	8323	9471	88460	81026	122085	93285			711	58264	66164	62153	59258	30544	30052	35864	32097	58953	58633	61671	66340
714	40905	57724	23002	41500	11666	11466	8058	9381	98282	92626	127283	99538			714	62676	71298	62702	60598	29768	30218	34636	33309	58442	57703	61498	66633
717	40763	62314	26694	42961	11933	11993	7948	9833	90720	83139	124160	92440			717	59054	65963	63321	59658	29673	30021	34866	32358	57410	58376	61353	66779
720	41822	57748	23519	40950	11600	11490	8181	9299	97051	92135	125860	99611			720	62863	69684	64073	60179	29576	30302	35488	32971	59577	58646	61365	66463
723	42040	60054	24189	44306	11551	11495	8448	9870	94349	86276	115580	90305			723	60739	69106	61168	57965	30033	29941	34507	32473	58091	57123	60997	65855
726	40776	58287	23585	41867	11635	11109	8221	9894	97698	91495	125252	99823			726	62611	72324	62114	59364	29826	30278	35366	32221	59003	57179	60716	64833
729	40586	62698	26688	44859	11546	11838	8095	9771	94356	79135	124611	91605			729	60829	63572	61579	58558	30209	30094	35187	31911	57572	58642	61258	67919
732	42753	59511	24860	43907	11785	11454	8203	9506	94569	85725	116936	90940			732	60518	69817	62439	59042	30085	30596	35165	32940	58870	57602	61295	66431
735	42690	61657	24895	44139	11789	11832	8096	9250	95939	86600	118284	91118			735	60362	69567	62524	58504	29901	30182	34260	32844	58665	57735	61155	65442
738	42334	59297	24460	43673	11331	11746	8184	9424	97733	86398	117178	91879			738	59807	68813	62672	58350	28729	30363	34266	32877	57650	57973	61104	67084
741	41878	59839	24732	44232	11769	11842	8076	9510	97018	88440	117432	92376			741	60175	69591	61230	58416	29403	29842	35089	33205	57929	57625	61097	67686
744	40702	62556	26147	44128	11383	11549	8250	9712	91671	80342	126698	92659			744	57477	65713	62852	59308	29850	30507	35081	31885	57961	57896	61733	66044
747	42005	59974	24442	42840	11479	11470	8307	9673	98076	88364	119582	90591			747	60074	70342	62563	59397	30296	30253	34611	32866	58670	59182	59804	66992
750	40628	57833	22738	41338	11636	11898	8182	9548	97261	91881	125186	100273			750	64342	69298	62381	59155	30409	29948	34954	32548	58421	57679	60008	65367
753	38504	59797	25207	41818	11481	11975	8221	9579	97782	81959	136604	100609			753	61190	67695	63755	59910	29089	29674	34387	32152	58022	59142	60998	66395
756	39823	58683	23676	41130	11548	11590	8113	9483	100919	96564	126339	99284			756	64620	70030	62573	60180	29072	29815	34550	32010	58033	57947	60496	66016
759	41001	59388	25057	43636	11836	11476	8097	9605	95543	88802	118727	91591			759	60383	70027	62072	60001	29925	29920	34411	32880	57675	59133	60305	65848
762	41280	62275	26172	43900	11819	11572	7893	9781	93194	81187	123252	90482			762	58881	65400	63128	59297	30750	30201	34604	32196	56813	58283	61509	67533
765	41691	59409	24657	43052	11287	11870	8368	9818	93227	88764	117044	90554			765	59294	68522	63307	59763	30213	30642	34614	31626	60452	57149	61496	65528
768	39778	59323	25310	41993	11728	11649	8335	9488	96318	83964	136589	97456			768	60527	67839	64149	61077	29567	30306	34475	32996	59089	58472	61826	66911
771	42009	60320	24411	43070	11256	11541	8244	9124	95911	88274	116388	90051			771	60207	68581	61843	59902	29395	29799	34420	31708	58124	56700	61331	66774
774	42089	60578	24605	44263	11716	11633	8514	9701	95211	87915	116513	93449			774	60273	68156	61376	58591	30449	30950	34812	32528	57445	57854	61309	67276
777	40176	57724	23807	41660	11986	11483	8357	9768	99684	94665	127424	98308			777	63991	72364	60961	59417	29861	30487	34708	32081	57770	56660	60384	66283
780	41041	61586	26746	43551	11507	11363	7816	9738	91232	82202	126456	92576			780	61097	65818	62499	59994	29752	30377	34375	32689	57956	58854	60988	67859
783	41180	57340	23123	41654	11446	11850	8206	9640	100349	96334	126692	100516			783	61796	71637	62262	60211	29978	30680	35403	32968	57773	58268	61129	67242
786	41829	58989	25260	43621	11457	11205	8212	9520	94658	88240	116561	90205			786	58266	70496	61998	59409	30668	29393	35056	32914	58047	58203	60977	66129
789	40676	57407	23065	41172	11148	11688	8194	9412	102367	93564	129364	98225			789	63473	72113	62133	59118	30285	30261	35168	33238	57869	57177	61114	66426
792	42575	58153	24825	44859	11775	11855	8107	9493	99722	85339	117072	91642			792	61463	68875	62127	57758	29821	30514	34728	31951	59458	56750	60335	65788
795	42116	58854	23707	43868	11740	11501	8045	9768	98309	86141	116437	90245			795	61280	68951	61182	59228	29972	30311	33951	32022	58213	58083	60642	66573
798	40735	61860	26181	42891	11705	11577	7746	9564	92098	79791	123941	92814			798	58954	64838	62385	59503	30548	30260	34415	32991	59020	59013	60670	68283
801	41956	59006	24642	44146	11791	11559	8284	9480	96450	86927	118970	89874			801	61812	68802	61224	58763	30247	30142	34662	32302	58271	58434	61653	66437
804	39686	59183	25642	40453	11490	11231	8050	9524	98155	87250	136776	100768			804	60510	65665	64107	61378	29775	30262	35081	32695	58905	58832	60329	66965
807	42595	59998	25362	43168	11955	11588	8257	9407	95839	86888	116476	90673			807	60508	68308	60243	59237	29754	29855	35123	31849	58227	57169	60818	66947
810	40372	61132	27063	43701	11750	11592	8360	9858	93548	78979	124068	91571			810	60428	65375	62768	59094	30470	29814	35408	32979	58212	58180	61635	67211
813	42616	60324	24431	44171	11592	11261	7988	9689	96450	88650	118054	88956			813	58717	69845	60771	59319	30212	30407	34481	31993	57645	58963	60468	66514
816	42864	58897	24423	44216	11728	11767	7995	9556	97335	85569	117029	90591			816	58692	68047	62903	59428	30471	30524	35474	32613	58156	57203	61289	66602
819	41764	58684	23750	41508	11636	11648	8135	9690	101837	93276	128691	97581			819	63433	69394	61820	60085	29519	30159	34745	32690	57805	58057	60732	66855
822	41179	57027	23108	41637	11388	11513	8243	9900	99026	93186	126298	99760			822	63089	71336	62609	59917	29964	30621	35044	32535	56961	57756	61032	66773
825	41120	61440	26655	42945	11544	11447	7571	9256	93681	81052	124843	91919			825	57277	65404	63133	60022	30175	29938	34150	32221	57463	58115	61679	65991
828	41827	58431	24666	43855	11348	11694	8274	9643	98974	87748	117362	90658			828	60792	68964	61864	58541	29493	30101	34765	32506	58688	56471	59528	67885
831	40619	61118	26432	43386	11649	11876	7819	9774	96177	79128	125672	93046			831	58215	67341	62024	59340	30884	29540	35316	32326	57187	58718	60478	67507
834	40870	61822	26227	43571	11439	11486	7929	9736	95521	79677	127677	90405			834	58925	66357	63427	59416	29952	29566	35056	32042	58246	57432	60255	66600
837	42776	58622	23996	43692	11531	11406	7725	9385	97739	87102	118168	89232			837	62085	69043	60741	59310	29824	29952	34696	31576	57849	58406	60868	65664
840	42165	60568	23821	44190	11656	11425	7967	9291	95451	87068	116605	89839			840	59948	68529	60629	58941	30083	29670	35679	32300	58809	58853	60277	65527
843	38928	60406	25454	41745	11646	11455	8310	9647	97402	85130	135979	99874			843	61268	67701	63554	60479	30140	30386	35869	32362	57594	57262	60660	66833
846	41586	60291	24344	44486	11929	11124	8148	9467	98954	89233	116884	91289			846	61129	67414	61487	57815	30093	30314	34543	32436	57412	57225	59928	65672
849	42175	59786	24247	43922	11499	11159	8087	9643	94858	87454	118460	90591			849	59461	68830	61584	58666	30062	29910	33780	33217	58104	57213	61120	66349
852	41081	59841	23946	43925	11523	11219	7951	9620	96067	88313	119926	91788			852	62017	66863	60310	57993	30046	30433	34367	32958	57754	57827	59825	65926
855	41110	61945	26944	44456	11697	11849	7978	9546	92072	81934	125579	92126			855	59443	66833	61206	60012	30258	30093	34338	33318	58003	58022	61190	66545
858	41390	57799	23190	41153	11166	11740	8291	9537	100583	96419	128788	99160			858	62540	71123	60844	60024	29749	30404	35328	31904	58593	57348	59877	66729
861	40219	57973	22703	42138	11691	11502	8382	9331	102294	92343	130640	98504			861	64564	72734	62159	61234	29685	30442	35798	32645	57486	57502	60432	67133
864	41686	62379	26473	43355	11774	11167	8382	9621	94230	82806	126667	91849			864	59409	64475	60974	59710	30581	30305	35121	32333	58061	58442	60644	65841
867	42508	60307	24643	43593	11230	11355	7979	9627	99351	84931	118026	89409			867	60357	68723	60889	58336	30147	29293	34718	32411	56637	57326	59984	66912
870	40091	57903	22553	40724	11528	11410	8559	9694	100580	92699	132952	97626			870	60996	69554	62275	60111	30427	29927	34855	32648	57613	57385	60500	66984
873	42125	58918	24823	44220	11587	11266	8321	9495	98820	87835	115691	90513			873	61230	68947	61212	58327	29890	29847	33832	32076	57860	58798	60416	67756
876	42912	58928	24730	43988	11369	11843	7892	9429	95974	89476	115365	89461			876	59179	68467	61212	59848	30010	31024	35066	32785	59522	57646	59762	66517
879	40636	56905	22450	41496	11155	11415	8414	9806	102431	94834	128675	98378			879	63126	69212	61018	59380	29151	30242	34405	33080	57413	58323	61019	66162
882	40328	58527	22667	41045	11561	11184	8133	9196	103411	94479	126150	98833			882	63779	72574	61513	59905	30391	30465	35485	33103	56676	57239	59314	66972
885	40111	59188	25073	41781	11713	11441	8293	9612	97474	84782	136328	100317			885	61176	68080	62765	60529	29758	30401	34866	32792	56960	56751	60564	66836
888	42138	59667	24234	43832	11444	11247	8163	9387	96420	88608	118218	88932			888	60054	67521	61334	58789	29410	29935	35507	33867	57491	57236	60268	66312
891	41998	60130	24713	45072	11535	11321	7719	9472	98516	91163	120474	89738			891	60748	68963	61581	59142	29977	30087	35024	32223	57215	57405	60526	65261
894	39809	57556	22883	40987	11666	11703	7840	9544	103082	96379	128068	98538			894	63438	72260	61842	60317	29770	30488	34571	32325	56752	57206	60537	65929
897	41133	61668	26406	44407	11199	11241	7980	9311	93716	83011	124394	89336			897	57923	65358	62232	60057	30507	29828	34382	32812	58276	57803	60060	66638
900	41241	59858	24393	43405	11452	11479	8010	9751	94080	89008	117045	88808			900	61508	68136	60463	58961	29846	30359	35408	31989	58073	57346	60803	66115
903	41320	58103	23613	43126	11231	10792	8029	9531	99128	92896	127384	97101			903	63026	69712	62522	59426	30105	29949	34424	32426	58137	56811	60204	67826
906	39986	61554	26485	43011	11491	11504	8392	9512	91545	80872	125507	89961			906	59130	64035	63901	60726	30150	30068	34708	32786	56934	56993	61421	67684
909	41557	62233	26332	43428	11529	11639	7998	9468	91324	82336	126561	90731			909	58024	66175	63503	60228	30006	29708	34918	32807	57149	56770	60657	66200
912	42681	59070	23880	43198	11616	11399	7932	9790	96673	88630	120126	89747			912	61270	70182	61264	59293	30400	30624	34854	32702	58104	58574	59964	68032
915	42326	60839	24399	43474	11171	11068	7857	9242	96793	88651	119380	89673			915	61750	71501	60969	58684	28891	29632	35371	32799	58282	57989	58693	64686
918	40300	58608	22967	40605	10984	11396	8136	9070	99185	94322	129177	97470			918	62627	70126	60388	60130	29862	30636	34783	32518	57006	57855	61317	65666
921	40594	57972	23229	41836	11183	11439	8047	9418	100508	96565	127109	97047			921	62211	71779	62211	59039	30643	31118	35347	32572	57835	58127	59905	65080
924	39239	59672	26156	41692	11087	11184	8495	9645	98173	87393	139731	97722			924	59895	67630	63890	59933	29670	30659	34992	32613	56615	58699	60673	65975
927	41675	59819	24678	43626	11215	11328	8021	9647	96269	86378	117914	89090			927	60484	69064	61358	58943	30097	30834	34331	32227	56904	56970	59593	65355
930	40020	61802	25741	43595	11142	11301	7879	9907	93410	81372	127638	90698			930	60032	65286	61813	59747	29620	30039	33890	31834	56635	56895	60046	66714
933	41936	59631	24908	44637	11627	11239	8097	9357	96018	88559	120117	88221			933	58885	71115	60732	58331	30223	30946	34552	32940	56145	56986	58969	66038
934	41592	57056	22331	41812	11783	11251	8260	9499	101328	95909	129878	98093			934	62264	71119	62324	59544	29588	31052	35283	32368	56709	55870	59003	65674
935	39816	58338	22670	42227	11422	11273	8094	9354	102659	93661	131558	97748			935	62571	71259	62219	59916	29727	29971	35244	33109	57297	57409	59781	65483
936	39190	59737	25297	41801	11209	11887	8045	9538	98552	87986	137384	100031			936	61383	67847	64894	61374	29890	30034	35581	33367	57022	57178	60690	66358
937	39623	57102	23365	41521	10860	11427	7889	9288	99993	94079	131353	97225			937	63280	71550	62843	59867	30540	30793	34521	32492	56915	57424	60245	66026
938	42142	60162	24013	42429	11167	11306	7896	9608	96960	86253	120861	90115			938	60579	68022	60377	57687	29879	30181	34275	33039	57329	57449	59894	67559
939	42313	58805	25006	43288	11443	11659	7806	8980	97196	87137	119767	89440			939	61509	67415	60727	59537	29867	29561	34498	32796	56021	57663	60227	65293
940	42944	59916	24734	44249	11262	11155	7504	9694	95126	89220	117280	89521			940	60278	67245	61023	58979	30478	30759	34606	32219	57745	58102	60250	64776
941	41418	59307	24254	43887	11156	11335	7695	9760	96175	89384	119289	88974			941	61308	67382	61057	58864	29600	29732	34935	32323	56507	57720	59537	65369
942	41333	59336	24452	43969	11675	10910	8436	9629	97664	88031	117480	89970			942	60416	68942	61554	59010	29915	30834	34838	33449	58505	56447	59666	65513
943	42103	60743	24093	44050	11948	11531	7996	9260	96757	89956	118101	90020			943	60686	66870	61408	60091	29417	30717	34699	33132	57479	56712	59851	65828
944	40704	58658	22776	41452	11255	11477	8053	9177	102454	97607	130118	98103			944	62152	68940	61337	60030	29764	29845	33749	32801	57970	56419	59485	65100
945	40958	62149	26502	43090	11620	11375	8198	9179	91890	82350	128128	90584			945	57052	65050	63386	59245	29996	30016	35873	32890	56227	57456	59645	67237
946	42400	59620	24019	43805	11306	11552	8236	9771	96516	89760	117572	88792			946	61008	68769	61331	59748	29657	29737	34941	33203	56531	58281	59555	64520
947	40453	59097	22753	41479	11176	11328	8080	9411	105172	94707	129718	97531			947	63655	67465	62459	60393	30134	31218	34750	32845	56302	58445	58929	66512
948	42145	59867	24450	43149	11623	11208	7768	9671	97236	90237	117713	89609			948	60380	67710	62075	58820	29794	30583	35149	32978	57678	56562	59551	66505
949	40264	57026	22830	40982	11035	11031	8175	9250	101868	96311	127322	97786			949	63529	70927	62408	60443	29228	30391	35581	33145	57792	57422	60275	65339
950	40804	61560	26283	43683	11062	11681	7955	9307	95488	83257	126781	90009			950	59059	66280	62261	59702	29715	30222	35060	32503	56344	57058	62008	65447
951	40606	61690	25823	44078	11307	11494	7920	9299	95425	82018	127351	90602			951	57240	65454	61674	59990	30018	29552	35515	33099	58362	57162	59865	66231
952	41084	59122	24135	44060	11404	11269	7847	9453	97642	89307	120764	89154			952	60926	67129	61540	58552	30326	30312	34524	33945	57690	57446	59445	65462
953	41845	58648	24471	44365	11295	11211	7912	9750	96874	91268	119121	87415			953	60324	66807	61334	58492	30583	29787	34681	32231	57158	56306	59432	65336
954	37819	59543	24965	41888	11395	10923	7962	9619	102041	88514	139389	99450			954	59911	67815	63187	60731	30077	29999	35173	32304	57894	57450	60524	66299
955	41316	57876	22857	40768	11619	11257	7902	9425	103772	96712	129366	97328			955	62353	68717	60119	59544	29389	30251	34563	32626	57340	56651	59489	66509
956	41796	61651	26698	42855	11505	11155	8321	9395	94986	84688	128330	90873			956	60598	65157	61970	60028	30739	30542	34981	32765	55796	56884	60629	66163
957	39589	61691	26502	43588	11612	11085	7916	9065	94869	82956	127457	90622			957	59307	64532	63066	58740	30018	29863	35115	33353	57076	56287	60744	65901
958	40985	62077	26089	43988	11264	11376	7982	9398	91651	81539	128607	90100			958	59381	65598	62195	59349	30075	30149	35087	33110	56999	57899	60406	66283
959	41817	57062	22820	41299	10976	11079	8215	9564	102684	97208	132355	98826			959	63666	72969	62531	60107	29886	30013	35540	32972	56648	56775	59432	65402
					--	--	--	--	--	--	--	--				--	--	--	--	--	--	--	--	--	--	--	--
					--	--	--	--	--	--	--	--				--	--	--	--	--	--	--	--	--	--	--	--
					--	--	--	--	--	--	--	--				--	--	--	--	--	--	--	--	--	--	--	--
					--	--	--	--	--	--	--	--				--	--	--	--	--	--	--	--	--	--	--	--
					--	--	--	--	--	--	--	--				--	--	--	--	--	--	--	--	--	--	--	--
					--	--	--	--	--	--	--	--				--	--	--	--	--	--	--	--	--	--	--	--
					--	--	--	--	--	--	--	--				--	--	--	--	--	--	--	--	--	--	--	--
					--	--	--	--	--	--	--	--				--	--	--	--	--	--	--	--	--	--	--	--
					--	--	--	--	--	--	--	--				--	--	--	--	--	--	--	--	--	--	--	--
					--	--	--	--	--	--	--	--				--	--	--	--	--	--	--	--	--	--	--	--
					--	--	--	--	--	--	--	--				--	--	--	--	--	--	--	--	--	--	--	--
					--	--	--	--	--	--	--	--				--	--	--	--	--	--	--	--	--	--	--	--
					--	--	--	--	--	--	--	--				--	--	--	--	--	--	--	--	--	--	--	--
					--	--	--	--	--	--	--	--				--	--	--	--	--	--	--	--	--	--	--	--
					--	--	--	--	--	--	--	--				--	--	--	--	--	--	--	--	--	--	--	--
					--	--	--	--	--	--	--	--				--	--	--	--	--	--	--	--	--	--	--	--
					--	--	--	--	--	--	--	--				--	--	--	--	--	--	--	--	--	--	--	--
					--	--	--	--	--	--	--	--				--	--	--	--	--	--	--	--	--	--	--	--
					--	--	--	--	--	--	--	--				--	--	--	--	--	--	--	--	--	--	--	--
					--	--	--	--	--	--	--	--				--	--	--	--	--	--	--	--	--	--	--	--
					--	--	--	--	--	--	--	--				--	--	--	--	--	--	--	--	--	--	--	--
					--	--	--	--	--	--	--	--				--	--	--	--	--	--	--	--	--	--	--	--
					--	--	--	--	--	--	--	--				--	--	--	--	--	--	--	--	--	--	--	--
					--	--	--	--	--	--	--	--				--	--	--	--	--	--	--	--	--	--	--	--
					--	--	--	--	--	--	--	--				--	--	--	--	--	--	--	--	--	--	--	--
					--	--	--	--	--	--	--	--				--	--	--	--	--	--	--	--	--	--	--	--
					--	--	--	--	--	--	--	--				--	--	--	--	--	--	--	--	--	--	--	--
					--	--	--	--	--	--	--	--				--	--	--	--	--	--	--	--	--	--	--	--
					--	--	--	--	--	--	--	--				--	--	--	--	--	--	--	--	--	--	--	--
					--	--	--	--	--	--	--	--				--	--	--	--	--	--	--	--	--	--	--	--
					--	--	--	--	--	--	--	--				--	--	--	--	--	--	--	--	--	--	--	--
					--	--	--	--	--	--	--	--				--	--	--	--	--	--	--	--	--	--	--	--
					--	--	--	--	--	--	--	--				--	--	--	--	--	--	--	--	--	--	--	--
					--	--	--	--	--	--	--	--				--	--	--	--	--	--	--	--	--	--	--	--
					--	--	--	--	--	--	--	--				--	--	--	--	--	--	--	--	--	--	--	--
					--	--	--	--	--	--	--	--				--	--	--	--	--	--	--	--	--	--	--	--
					--	--	--	--	--	--	--	--				--	--	--	--	--	--	--	--	--	--	--	--
					--	--	--	--	--	--	--	--				--	--	--	--	--	--	--	--	--	--	--	--
					--	--	--	--	--	--	--	--				--	--	--	--	--	--	--	--	--	--	--	--
					--	--	--	--	--	--	--	--				--	--	--	--	--	--	--	--	--	--	--	--
					--	--	--	--	--	--	--	--				--	--	--	--	--	--	--	--	--	--	--	--
					--	--	--	--	--	--	--	--				--	--	--	--	--	--	--	--	--	--	--	--
					--	--	--	--	--	--	--	--				--	--	--	--	--	--	--	--	--	--	--	--
					--	--	--	--	--	--	--	--				--	--	--	--	--	--	--	--	--	--	--	--
					--	--	--	--	--	--	--	--				--	--	--	--	--	--	--	--	--	--	--	--
					--	--	--	--	--	--	--	--				--	--	--	--	--	--	--	--	--	--	--	--
					--	--	--	--	--	--	--	--				--	--	--	--	--	--	--	--	--	--	--	--
					--	--	--	--	--	--	--	--				--	--	--	--	--	--	--	--	--	--	--	--
					--	--	--	--	--	--	--	--				--	--	--	--	--	--	--	--	--	--	--	--
					--	--	--	--	--	--	--	--				--	--	--	--	--	--	--	--	--	--	--	--
					--	--	--	--	--	--	--	--				--	--	--	--	--	--	--	--	--	--	--	--
					--	--	--	--	--	--	--	--				--	--	--	--	--	--	--	--	--	--	--	--
					--	--	--	--	--	--	--	--				--	--	--	--	--	--	--	--	--	--	--	--
					--	--	--	--	--	--	--	--				--	--	--	--	--	--	--	--	--	--	--	--
					--	--	--	--	--	--	--	--				--	--	--	--	--	--	--	--	--	--	--	--
					--	--	--	--	--	--	--	--				--	--	--	--	--	--	--	--	--	--	--	--
					--	--	--	--	--	--	--	--				--	--	--	--	--	--	--	--	--	--	--	--
					--	--	--	--	--	--	--	--				--	--	--	--	--	--	--	--	--	--	--	--
					--	--	--	--	--	--	--	--				--	--	--	--	--	--	--	--	--	--	--	--
					--	--	--	--	--	--	--	--				--	--	--	--	--	--	--	--	--	--	--	--
					--	--	--	--	--	--	--	--				--	--	--	--	--	--	--	--	--	--	--	--
					--	--	--	--	--	--	--	--				--	--	--	--	--	--	--	--	--	--	--	--
					--	--	--	--	--	--	--	--				--	--	--	--	--	--	--	--	--	--	--	--
					--	--	--	--	--	--	--	--				--	--	--	--	--	--	--	--	--	--	--	--
					--	--	--	--	--	--	--	--				--	--	--	--	--	--	--	--	--	--	--	--
					--	--	--	--	--	--	--	--				--	--	--	--	--	--	--	--	--	--	--	--
					--	--	--	--	--	--	--	--				--	--	--	--	--	--	--	--	--	--	--	--
					--	--	--	--	--	--	--	--				--	--	--	--	--	--	--	--	--	--	--	--
					--	--	--	--	--	--	--	--				--	--	--	--	--	--	--	--	--	--	--	--
					--	--	--	--	--	--	--	--				--	--	--	--	--	--	--	--	--	--	--	--
					--	--	--	--	--	--	--	--				--	--	--	--	--	--	--	--	--	--	--	--
					--	--	--	--	--	--	--	--				--	--	--	--	--	--	--	--	--	--	--	--
					--	--	--	--	--	--	--	--				--	--	--	--	--	--	--	--	--	--	--	--
					--	--	--	--	--	--	--	--				--	--	--	--	--	--	--	--	--	--	--	--
					--	--	--	--	--	--	--	--				--	--	--	--	--	--	--	--	--	--	--	--
					--	--	--	--	--	--	--	--				--	--	--	--	--	--	--	--	--	--	--	--
					--	--	--	--	--	--	--	--				--	--	--	--	--	--	--	--	--	--	--	--
					--	--	--	--	--	--	--	--				--	--	--	--	--	--	--	--	--	--	--	--
					--	--	--	--	--	--	--	--				--	--	--	--	--	--	--	--	--	--	--	--
					--	--	--	--	--	--	--	--				--	--	--	--	--	--	--	--	--	--	--	--
					--	--	--	--	--	--	--	--				--	--	--	--	--	--	--	--	--	--	--	--
					--	--	--	--	--	--	--	--				--	--	--	--	--	--	--	--	--	--	--	--
					--	--	--	--	--	--	--	--				--	--	--	--	--	--	--	--	--	--	--	--
					--	--	--	--	--	--	--	--				--	--	--	--	--	--	--	--	--	--	--	--
					--	--	--	--	--	--	--	--				--	--	--	--	--	--	--	--	--	--	--	--
					--	--	--	--	--	--	--	--				--	--	--	--	--	--	--	--	--	--	--	--
					--	--	--	--	--	--	--	--				--	--	--	--	--	--	--	--	--	--	--	--
					--	--	--	--	--	--	--	--				--	--	--	--	--	--	--	--	--	--	--	--
					--	--	--	--	--	--	--	--				--	--	--	--	--	--	--	--	--	--	--	--
					--	--	--	--	--	--	--	--				--	--	--	--	--	--	--	--	--	--	--	--
					--	--	--	--	--	--	--	--				--	--	--	--	--	--	--	--	--	--	--	--
					--	--	--	--	--	--	--	--				--	--	--	--	--	--	--	--	--	--	--	--
					--	--	--	--	--	--	--	--				--	--	--	--	--	--	--	--	--	--	--	--
					--	--	--	--	--	--	--	--				--	--	--	--	--	--	--	--	--	--	--	--
					--	--	--	--	--	--	--	--				--	--	--	--	--	--	--	--	--	--	--	--
					--	--	--	--	--	--	--	--				--	--	--	--	--	--	--	--	--	--	--	--
					--	--	--	--	--	--	--	--				--	--	--	--	--	--	--	--	--	--	--	--
					--	--	--	--	--	--	--	--				--	--	--	--	--	--	--	--	--	--	--	--
					--	--	--	--	--	--	--	--				--	--	--	--	--	--	--	--	--	--	--	--
					--	--	--	--	--	--	--	--				--	--	--	--	--	--	--	--	--	--	--	--
					--	--	--	--	--	--	--	--				--	--	--	--	--	--	--	--	--	--	--	--
					--	--	--	--	--	--	--	--				--	--	--	--	--	--	--	--	--	--	--	--
					--	--	--	--	--	--	--	--				--	--	--	--	--	--	--	--	--	--	--	--
					--	--	--	--	--	--	--	--				--	--	--	--	--	--	--	--	--	--	--	--
					--	--	--	--	--	--	--	--				--	--	--	--	--	--	--	--	--	--	--	--
					--	--	--	--	--	--	--	--				--	--	--	--	--	--	--	--	--	--	--	--
					--	--	--	--	--	--	--	--				--	--	--	--	--	--	--	--	--	--	--	--
					--	--	--	--	--	--	--	--				--	--	--	--	--	--	--	--	--	--	--	--
					--	--	--	--	--	--	--	--				--	--	--	--	--	--	--	--	--	--	--	--
					--	--	--	--	--	--	--	--				--	--	--	--	--	--	--	--	--	--	--	--
					--	--	--	--	--	--	--	--				--	--	--	--	--	--	--	--	--	--	--	--
					--	--	--	--	--	--	--	--				--	--	--	--	--	--	--	--	--	--	--	--
					--	--	--	--	--	--	--	--				--	--	--	--	--	--	--	--	--	--	--	--
					--	--	--	--	--	--	--	--				--	--	--	--	--	--	--	--	--	--	--	--
					--	--	--	--	--	--	--	--				--	--	--	--	--	--	--	--	--	--	--	--
					--	--	--	--	--	--	--	--				--	--	--	--	--	--	--	--	--	--	--	--
					--	--	--	--	--	--	--	--				--	--	--	--	--	--	--	--	--	--	--	--
					--	--	--	--	--	--	--	--				--	--	--	--	--	--	--	--	--	--	--	--
					--	--	--	--	--	--	--	--				--	--	--	--	--	--	--	--	--	--	--	--
					--	--	--	--	--	--	--	--				--	--	--	--	--	--	--	--	--	--	--	--
					--	--	--	--	--	--	--	--				--	--	--	--	--	--	--	--	--	--	--	--
					--	--	--	--	--	--	--	--				--	--	--	--	--	--	--	--	--	--	--	--
					--	--	--	--	--	--	--	--				--	--	--	--	--	--	--	--	--	--	--	--
					--	--	--	--	--	--	--	--				--	--	--	--	--	--	--	--	--	--	--	--
					--	--	--	--	--	--	--	--				--	--	--	--	--	--	--	--	--	--	--	--
					--	--	--	--	--	--	--	--				--	--	--	--	--	--	--	--	--	--	--	--
					--	--	--	--	--	--	--	--				--	--	--	--	--	--	--	--	--	--	--	--
					--	--	--	--	--	--	--	--				--	--	--	--	--	--	--	--	--	--	--	--
					--	--	--	--	--	--	--	--				--	--	--	--	--	--	--	--	--	--	--	--
					--	--	--	--	--	--	--	--				--	--	--	--	--	--	--	--	--	--	--	--
					--	--	--	--	--	--	--	--				--	--	--	--	--	--	--	--	--	--	--	--
					--	--	--	--	--	--	--	--				--	--	--	--	--	--	--	--	--	--	--	--
					--	--	--	--	--	--	--	--				--	--	--	--	--	--	--	--	--	--	--	--
					--	--	--	--	--	--	--	--				--	--	--	--	--	--	--	--	--	--	--	--
					--	--	--	--	--	--	--	--				--	--	--	--	--	--	--	--	--	--	--	--
					--	--	--	--	--	--	--	--				--	--	--	--	--	--	--	--	--	--	--	--
					--	--	--	--	--	--	--	--				--	--	--	--	--	--	--	--	--	--	--	--
					--	--	--	--	--	--	--	--				--	--	--	--	--	--	--	--	--	--	--	--
					--	--	--	--	--	--	--	--				--	--	--	--	--	--	--	--	--	--	--	--
					--	--	--	--	--	--	--	--				--	--	--	--	--	--	--	--	--	--	--	--
					--	--	--	--	--	--	--	--				--	--	--	--	--	--	--	--	--	--	--	--
					--	--	--	--	--	--	--	--				--	--	--	--	--	--	--	--	--	--	--	--
					--	--	--	--	--	--	--	--				--	--	--	--	--	--	--	--	--	--	--	--
					--	--	--	--	--	--	--	--				--	--	--	--	--	--	--	--	--	--	--	--
					--	--	--	--	--	--	--	--				--	--	--	--	--	--	--	--	--	--	--	--
					--	--	--	--	--	--	--	--				--	--	--	--	--	--	--	--	--	--	--	--
					--	--	--	--	--	--	--	--				--	--	--	--	--	--	--	--	--	--	--	--
					--	--	--	--	--	--	--	--				--	--	--	--	--	--	--	--	--	--	--	--
					--	--	--	--	--	--	--	--				--	--	--	--	--	--	--	--	--	--	--	--
					--	--	--	--	--	--	--	--				--	--	--	--	--	--	--	--	--	--	--	--
					--	--	--	--	--	--	--	--				--	--	--	--	--	--	--	--	--	--	--	--
					--	--	--	--	--	--	--	--				--	--	--	--	--	--	--	--	--	--	--	--
					--	--	--	--	--	--	--	--				--	--	--	--	--	--	--	--	--	--	--	--
					--	--	--	--	--	--	--	--				--	--	--	--	--	--	--	--	--	--	--	--
					--	--	--	--	--	--	--	--				--	--	--	--	--	--	--	--	--	--	--	--
					--	--	--	--	--	--	--	--				--	--	--	--	--	--	--	--	--	--	--	--
					--	--	--	--	--	--	--	--				--	--	--	--	--	--	--	--	--	--	--	--
					--	--	--	--	--	--	--	--				--	--	--	--	--	--	--	--	--	--	--	--
					--	--	--	--	--	--	--	--				--	--	--	--	--	--	--	--	--	--	--	--
					--	--	--	--	--	--	--	--				--	--	--	--	--	--	--	--	--	--	--	--
					--	--	--	--	--	--	--	--				--	--	--	--	--	--	--	--	--	--	--	--
					--	--	--	--	--	--	--	--				--	--	--	--	--	--	--	--	--	--	--	--
					--	--	--	--	--	--	--	--				--	--	--	--	--	--	--	--	--	--	--	--
					--	--	--	--	--	--	--	--				--	--	--	--	--	--	--	--	--	--	--	--
					--	--	--	--	--	--	--	--				--	--	--	--	--	--	--	--	--	--	--	--
					--	--	--	--	--	--	--	--				--	--	--	--	--	--	--	--	--	--	--	--
					--	--	--	--	--	--	--	--				--	--	--	--	--	--	--	--	--	--	--	--
					--	--	--	--	--	--	--	--				--	--	--	--	--	--	--	--	--	--	--	--
					--	--	--	--	--	--	--	--				--	--	--	--	--	--	--	--	--	--	--	--
					--	--	--	--	--	--	--	--				--	--	--	--	--	--	--	--	--	--	--	--
					--	--	--	--	--	--	--	--				--	--	--	--	--	--	--	--	--	--	--	--
					--	--	--	--	--	--	--	--				--	--	--	--	--	--	--	--	--	--	--	--
					--	--	--	--	--	--	--	--				--	--	--	--	--	--	--	--	--	--	--	--
					--	--	--	--	--	--	--	--				--	--	--	--	--	--	--	--	--	--	--	--
					--	--	--	--	--	--	--	--				--	--	--	--	--	--	--	--	--	--	--	--
					--	--	--	--	--	--	--	--				--	--	--	--	--	--	--	--	--	--	--	--
					--	--	--	--	--	--	--	--				--	--	--	--	--	--	--	--	--	--	--	--
					--	--	--	--	--	--	--	--				--	--	--	--	--	--	--	--	--	--	--	--
					--	--	--	--	--	--	--	--				--	--	--	--	--	--	--	--	--	--	--	--
					--	--	--	--	--	--	--	--				--	--	--	--	--	--	--	--	--	--	--	--
					--	--	--	--	--	--	--	--				--	--	--	--	--	--	--	--	--	--	--	--
					--	--	--	--	--	--	--	--				--	--	--	--	--	--	--	--	--	--	--	--
					--	--	--	--	--	--	--	--				--	--	--	--	--	--	--	--	--	--	--	--
					--	--	--	--	--	--	--	--				--	--	--	--	--	--	--	--	--	--	--	--
					--	--	--	--	--	--	--	--				--	--	--	--	--	--	--	--	--	--	--	--
					--	--	--	--	--	--	--	--				--	--	--	--	--	--	--	--	--	--	--	--
					--	--	--	--	--	--	--	--				--	--	--	--	--	--	--	--	--	--	--	--
					--	--	--	--	--	--	--	--				--	--	--	--	--	--	--	--	--	--	--	--
					--	--	--	--	--	--	--	--				--	--	--	--	--	--	--	--	--	--	--	--
					--	--	--	--	--	--	--	--				--	--	--	--	--	--	--	--	--	--	--	--
					--	--	--	--	--	--	--	--				--	--	--	--	--	--	--	--	--	--	--	--
					--	--	--	--	--	--	--	--				--	--	--	--	--	--	--	--	--	--	--	--
					--	--	--	--	--	--	--	--				--	--	--	--	--	--	--	--	--	--	--	--
					--	--	--	--	--	--	--	--				--	--	--	--	--	--	--	--	--	--	--	--
					--	--	--	--	--	--	--	--				--	--	--	--	--	--	--	--	--	--	--	--
					--	--	--	--	--	--	--	--				--	--	--	--	--	--	--	--	--	--	--	--
					--	--	--	--	--	--	--	--				--	--	--	--	--	--	--	--	--	--	--	--
					--	--	--	--	--	--	--	--				--	--	--	--	--	--	--	--	--	--	--	--
					--	--	--	--	--	--	--	--				--	--	--	--	--	--	--	--	--	--	--	--
					--	--	--	--	--	--	--	--				--	--	--	--	--	--	--	--	--	--	--	--
					--	--	--	--	--	--	--	--				--	--	--	--	--	--	--	--	--	--	--	--
					--	--	--	--	--	--	--	--				--	--	--	--	--	--	--	--	--	--	--	--
					--	--	--	--	--	--	--	--				--	--	--	--	--	--	--	--	--	--	--	--
					--	--	--	--	--	--	--	--				--	--	--	--	--	--	--	--	--	--	--	--
					--	--	--	--	--	--	--	--				--	--	--	--	--	--	--	--	--	--	--	--
					--	--	--	--	--	--	--	--				--	--	--	--	--	--	--	--	--	--	--	--
					--	--	--	--	--	--	--	--				--	--	--	--	--	--	--	--	--	--	--	--
					--	--	--	--	--	--	--	--				--	--	--	--	--	--	--	--	--	--	--	--
					--	--	--	--	--	--	--	--				--	--	--	--	--	--	--	--	--	--	--	--
					--	--	--	--	--	--	--	--				--	--	--	--	--	--	--	--	--	--	--	--
					--	--	--	--	--	--	--	--				--	--	--	--	--	--	--	--	--	--	--	--
					--	--	--	--	--	--	--	--				--	--	--	--	--	--	--	--	--	--	--	--
					--	--	--	--	--	--	--	--				--	--	--	--	--	--	--	--	--	--	--	--
					--	--	--	--	--	--	--	--				--	--	--	--	--	--	--	--	--	--	--	--
					--	--	--	--	--	--	--	--				--	--	--	--	--	--	--	--	--	--	--	--
					--	--	--	--	--	--	--	--				--	--	--	--	--	--	--	--	--	--	--	--
					--	--	--	--	--	--	--	--				--	--	--	--	--	--	--	--	--	--	--	--
					--	--	--	--	--	--	--	--				--	--	--	--	--	--	--	--	--	--	--	--
					--	--	--	--	--	--	--	--				--	--	--	--	--	--	--	--	--	--	--	--
					--	--	--	--	--	--	--	--				--	--	--	--	--	--	--	--	--	--	--	--
					--	--	--	--	--	--	--	--				--	--	--	--	--	--	--	--	--	--	--	--
					--	--	--	--	--	--	--	--				--	--	--	--	--	--	--	--	--	--	--	--
					--	--	--	--	--	--	--	--				--	--	--	--	--	--	--	--	--	--	--	--
					--	--	--	--	--	--	--	--				--	--	--	--	--	--	--	--	--	--	--	--
					--	--	--	--	--	--	--	--				--	--	--	--	--	--	--	--	--	--	--	--
					--	--	--	--	--	--	--	--				--	--	--	--	--	--	--	--	--	--	--	--
					--	--	--	--	--	--	--	--				--	--	--	--	--	--	--	--	--	--	--	--
					--	--	--	--	--	--	--	--				--	--	--	--	--	--	--	--	--	--	--	--
					--	--	--	--	--	--	--	--				--	--	--	--	--	--	--	--	--	--	--	--
					--	--	--	--	--	--	--	--				--	--	--	--	--	--	--	--	--	--	--	--
					--	--	--	--	--	--	--	--				--	--	--	--	--	--	--	--	--	--	--	--
					--	--	--	--	--	--	--	--				--	--	--	--	--	--	--	--	--	--	--	--
					--	--	--	--	--	--	--	--				--	--	--	--	--	--	--	--	--	--	--	--
					--	--	--	--	--	--	--	--				--	--	--	--	--	--	--	--	--	--	--	--
					--	--	--	--	--	--	--	--				--	--	--	--	--	--	--	--	--	--	--	--
					--	--	--	--	--	--	--	--				--	--	--	--	--	--	--	--	--	--	--	--
					--	--	--	--	--	--	--	--				--	--	--	--	--	--	--	--	--	--	--	--
					--	--	--	--	--	--	--	--				--	--	--	--	--	--	--	--	--	--	--	--
					--	--	--	--	--	--	--	--				--	--	--	--	--	--	--	--	--	--	--	--
					--	--	--	--	--	--	--	--				--	--	--	--	--	--	--	--	--	--	--	--
					--	--	--	--	--	--	--	--				--	--	--	--	--	--	--	--	--	--	--	--
					--	--	--	--	--	--	--	--				--	--	--	--	--	--	--	--	--	--	--	--
					--	--	--	--	--	--	--	--				--	--	--	--	--	--	--	--	--	--	--	--
					--	--	--	--	--	--	--	--				--	--	--	--	--	--	--	--	--	--	--	--
					--	--	--	--	--	--	--	--				--	--	--	--	--	--	--	--	--	--	--	--
					--	--	--	--	--	--	--	--				--	--	--	--	--	--	--	--	--	--	--	--
					--	--	--	--	--	--	--	--				--	--	--	--	--	--	--	--	--	--	--	--
					--	--	--	--	--	--	--	--				--	--	--	--	--	--	--	--	--	--	--	--
					--	--	--	--	--	--	--	--				--	--	--	--	--	--	--	--	--	--	--	--
					--	--	--	--	--	--	--	--				--	--	--	--	--	--	--	--	--	--	--	--
					--	--	--	--	--	--	--	--				--	--	--	--	--	--	--	--	--	--	--	--
					--	--	--	--	--	--	--	--				--	--	--	--	--	--	--	--	--	--	--	--
					--	--	--	--	--	--	--	--				--	--	--	--	--	--	--	--	--	--	--	--
					--	--	--	--	--	--	--	--				--	--	--	--	--	--	--	--	--	--	--	--
					--	--	--	--	--	--	--	--				--	--	--	--	--	--	--	--	--	--	--	--
					--	--	--	--	--	--	--	--				--	--	--	--	--	--	--	--	--	--	--	--
					--	--	--	--	--	--	--	--				--	--	--	--	--	--	--	--	--	--	--	--
					--	--	--	--	--	--	--	--				--	--	--	--	--	--	--	--	--	--	--	--
					--	--	--	--	--	--	--	--				--	--	--	--	--	--	--	--	--	--	--	--
					--	--	--	--	--	--	--	--				--	--	--	--	--	--	--	--	--	--	--	--
					--	--	--	--	--	--	--	--				--	--	--	--	--	--	--	--	--	--	--	--
					--	--	--	--	--	--	--	--				--	--	--	--	--	--	--	--	--	--	--	--
					--	--	--	--	--	--	--	--				--	--	--	--	--	--	--	--	--	--	--	--
					--	--	--	--	--	--	--	--				--	--	--	--	--	--	--	--	--	--	--	--
					--	--	--	--	--	--	--	--				--	--	--	--	--	--	--	--	--	--	--	--
					--	--	--	--	--	--	--	--				--	--	--	--	--	--	--	--	--	--	--	--
					--	--	--	--	--	--	--	--				--	--	--	--	--	--	--	--	--	--	--	--
					--	--	--	--	--	--	--	--				--	--	--	--	--	--	--	--	--	--	--	--
					--	--	--	--	--	--	--	--				--	--	--	--	--	--	--	--	--	--	--	--
					--	--	--	--	--	--	--	--				--	--	--	--	--	--	--	--	--	--	--	--
					--	--	--	--	--	--	--	--				--	--	--	--	--	--	--	--	--	--	--	--
					--	--	--	--	--	--	--	--				--	--	--	--	--	--	--	--	--	--	--	--
					--	--	--	--	--	--	--	--				--	--	--	--	--	--	--	--	--	--	--	--
					--	--	--	--	--	--	--	--				--	--	--	--	--	--	--	--	--	--	--	--
					--	--	--	--	--	--	--	--				--	--	--	--	--	--	--	--	--	--	--	--
					--	--	--	--	--	--	--	--				--	--	--	--	--	--	--	--	--	--	--	--
					--	--	--	--	--	--	--	--				--	--	--	--	--	--	--	--	--	--	--	--
					--	--	--	--	--	--	--	--				--	--	--	--	--	--	--	--	--	--	--	--
					--	--	--	--	--	--	--	--				--	--	--	--	--	--	--	--	--	--	--	--
					--	--	--	--	--	--	--	--				--	--	--	--	--	--	--	--	--	--	--	--
					--	--	--	--	--	--	--	--				--	--	--	--	--	--	--	--	--	--	--	--
					--	--	--	--	--	--	--	--				--	--	--	--	--	--	--	--	--	--	--	--
					--	--	--	--	--	--	--	--				--	--	--	--	--	--	--	--	--	--	--	--
					--	--	--	--	--	--	--	--				--	--	--	--	--	--	--	--	--	--	--	--
					--	--	--	--	--	--	--	--				--	--	--	--	--	--	--	--	--	--	--	--
					--	--	--	--	--	--	--	--				--	--	--	--	--	--	--	--	--	--	--	--
					--	--	--	--	--	--	--	--				--	--	--	--	--	--	--	--	--	--	--	--
					--	--	--	--	--	--	--	--				--	--	--	--	--	--	--	--	--	--	--	--

## Sheet: Figure 3
CU	Ab control	Ab control	Ab control	Ab control	Ab+glucose	Ab+glucose	Ab+glucose	Ab+glucose	Ab+Ca	Ab+Ca	Ab+Ca	Ab+Ca	Ab+Mg	Ab+Mg	Ab+Mg	Ab+Mg	Ab+Urea	Ab+Urea	Ab+Urea	Ab+Urea	Ab+HSA	Ab+HSA	Ab+HSA	Ab+HSA	Ab+cholesterol	Ab+cholesterol	Ab+cholesterol	Ab+cholesterol	Ab+lactate	Ab+lactate	Ab+lactate	Ab+lactate	Ab+glutamine	Ab+glutamine	Ab+glutamine	Ab+glutamine	Ab in aCSF	Ab in aCSF	Ab in aCSF	Ab in aCSF		With VR16-09	Ab control	Ab control	Ab control	Ab control	Ab+glucose	Ab+glucose	Ab+glucose
0	7718	7485	7529	7762	7496	7734	9081	7562	7596	7795	7311	7782	7588	7548	7799	7818	35497	7897	11265	7397	23213	22633	22285	22558	7800	7974	8070	7807	8017	7836	7901	7535	8187	7872	7609	7762	29322	29792	28168	27876			30179	30024	20727	24136	58242	52082	44471
3	7547	6973	7355	7484	7181	7354	9275	7582	7582	7255	7140	7360	7558	7534	7162	7239	11252	7274	11030	7759	21046	21409	21020	20610	6967	7191	7014	7534	7282	7522	7502	7280	7270	7680	7325	7106	26197	26968	24885	24952			16695	14581	11616	12621	28837	27023	21202
6	6921	7247	7272	6865	7050	7214	8618	7152	7067	6817	7282	7075	7129	7071	7295	7256	8861	6856	9538	7205	20773	19514	19745	20168	7048	6941	7132	7178	7323	6959	7495	7083	7040	7348	7306	7129	24039	24633	22933	22857			11534	11641	8769	9101	21703	19544	14722
9	7031	6999	6986	7191	7090	6941	8353	7045	6794	6875	7034	7371	6627	7533	7019	7110	6626	7062	9414	6841	19245	19226	18732	19329	6588	7135	7001	7199	7163	7146	7275	7310	7258	7123	7056	7185	23283	23076	22149	22644			9067	10128	8225	8472	16701	15618	12106
12	6863	6984	7037	6907	6788	6693	8399	7181	7122	6604	7158	6605	7034	7184	6865	6965	6889	6708	9596	7240	18676	18672	18691	18356	6784	6623	6824	6845	6671	6727	6524	7039	6967	6851	6790	7276	22184	22266	21201	20710			8866	8953	7991	7861	15022	13628	10672
15	7254	6574	6958	7001	6694	6929	8052	7049	7042	7156	6815	7160	7013	7145	6664	7061	6660	7153	9153	6779	18238	18649	18114	18364	6440	6927	7061	7064	6845	6653	6890	6909	6949	7063	6642	7167	21890	21330	21203	21367			8028	8408	7176	7920	13861	13045	10487
18	7092	7513	7214	6932	7059	7099	8428	6755	8004	7775	7783	7642	7366	7568	7542	7292	7054	6797	9393	7290	18555	18332	17896	17436	7465	6631	6845	7098	7097	6633	7027	6829	6687	6840	6876	7057	21153	21067	20429	20321			8437	8315	7028	7005	13334	12499	10292
21	6911	7402	7292	7473	7756	7855	8659	7284	9913	9030	9005	9105	9061	8589	8675	7950	7711	7507	10835	7774	18145	17692	17626	18019	7287	7397	8006	7328	7403	6946	7176	7416	6868	7214	6832	6674	20494	20555	20740	20595			8380	7878	7899	7416	13438	11412	10389
24	7022	8077	8113	7827	9126	8956	9167	7676	13830	14048	12766	12319	9862	10896	9648	10122	9228	9061	12166	8934	18166	17770	17605	17232	8057	8090	9048	8832	7846	7696	7848	8077	6938	6899	6679	7188	20043	20011	19835	19274			8262	8272	7718	7345	13192	11227	10125
27	7050	9694	9259	9309	10249	11157	11233	9248	19343	19590	16594	15609	12511	11927	11883	11463	9974	10228	15911	10514	17526	18063	17406	17741	9685	10021	10823	10414	9360	8945	9259	9037	7150	6865	6683	6572	20427	20115	20074	19157			9939	9074	8676	8440	14450	11434	9983
30	7585	12217	11338	10501	14300	13537	13092	10776	26680	22524	21312	19910	14821	16310	15006	14528	13076	13300	17215	12872	18096	18378	17151	17115	11689	11511	15231	11897	9704	11830	11255	11215	7268	6707	6907	6856	20118	19283	19836	19403			10200	10440	9277	9855	13573	11422	10107
33	7844	14277	14189	12677	16697	16911	14633	13308	29544	28709	29138	24954	21247	20937	18970	18872	17678	16407	21481	16641	18087	17690	17402	17560	16513	14768	21441	16751	13410	14699	13943	14487	6794	6856	6776	7075	20413	20113	19876	19226			13294	12540	11843	11297	14507	12056	10789
36	8368	18712	17426	14818	22307	22098	19149	15405	33660	35147	36254	28509	26425	26727	24102	22948	24810	22781	29054	20787	17431	17916	17294	17747	20771	21416	26183	21899	19922	21253	20212	20232	7130	7312	7823	7005	20558	20291	20891	19744			17755	16013	15684	15614	16720	12710	11339
39	8730	19346	20795	19283	27033	27969	21754	21287	39868	37551	37827	31263	30213	30875	28827	29098	29884	27147	32894	25120	17008	17317	17473	17567	28125	25288	30509	27104	23813	27249	25537	24337	7066	7295	7450	7345	21848	20996	22117	20202			28373	22827	21883	22758	16346	13389	12220
42	9663	25733	25541	23417	34044	32605	27768	27156	42269	40693	40022	35400	31683	33910	34568	33355	32955	31048	37818	27048	17824	17456	16981	17478	33553	32578	32504	32701	30425	32255	30856	31211	7212	7382	7783	7538	23081	21978	23032	21676			33148	28625	29196	26990	18766	15120	12809
45	9906	30927	29934	27450	37243	37317	31059	31639	36980	40638	38356	36408	33943	35380	37315	35178	34981	35210	41363	32706	18206	17716	17112	17610	36161	34797	36443	35540	35241	34664	35762	33913	7957	8027	8423	7752	24346	22840	24164	22257			36696	31287	33694	30617	20023	17184	16965
48	10817	36718	32212	30821	39594	38823	34969	34698	37847	47493	41314	39515	37299	38142	37791	36284	37552	37594	43686	35939	18053	18041	17606	17521	38309	36480	35609	38912	38103	37585	37368	37109	8369	9042	8854	7631	26214	24543	24990	22850			38174	35377	35754	35176	24452	23128	22488
51	11066	38917	34546	32151	41379	40490	37761	34789	38273	44117	41135	39022	37358	38826	36155	38593	38756	38954	43491	34503	17856	18089	17416	17471	40347	40036	39309	41212	39253	39653	40476	38804	8367	9222	10312	8453	27816	25973	26864	24510			43168	38994	37480	38525	29683	29648	30210
54	11968	39378	36562	33330	39973	40101	37534	37345	39285	45363	43904	39846	38496	37798	39887	37602	38231	38333	44282	37691	17356	18284	17761	17823	39146	39549	38798	41380	40129	40796	40846	40405	11609	10393	11987	9876	29403	26907	27641	25713			41331	40982	37898	38457	29696	36984	33358
57	12322	39404	38889	36926	41152	40367	40171	39381	41522	43226	40699	39914	39687	39123	41301	39535	40132	39116	45192	39800	17676	17711	17869	17457	41518	41825	41415	41828	40290	41241	43005	41027	12904	13779	14118	11833	30490	28204	28559	26732			41880	42848	40104	38785	36352	35843	38848
60	13198	39698	37389	36920	42197	40907	38564	39632	39971	40669	44293	39940	38983	40221	42066	40810	39231	39312	46581	39828	18206	17882	17412	17194	43933	40868	41687	41900	40430	42965	41560	41623	15516	15960	17501	13817	32918	28105	30002	28255			43905	41580	41288	42150	37109	40963	39633
63	14043	39020	40299	39949	42059	40970	40992	39460	40251	43705	43947	41291	40429	40017	41355	40238	37705	42020	45975	41113	18321	17527	17468	17941	42248	42376	43999	42232	42885	40708	43375	41751	15493	18001	16991	16098	33282	29733	30910	28361			43358	44336	40106	42181	45145	46100	41340
66	14125	38519	38513	36951	39873	40616	39894	40620	42250	40450	47037	43162	39110	42620	39235	40632	40133	41683	46982	42459	17684	18081	18270	17906	43883	45004	42221	43460	43121	39792	42905	42672	18997	20782	22419	16264	33405	31049	31938	30505			43901	44593	41577	39681	49915	48770	44440
69	15338	42523	38692	36501	39350	38395	37283	39792	43150	40096	45631	41164	43599	40327	42007	40117	39862	41286	44575	40815	18619	17704	18621	18214	43866	43832	44969	43802	44242	41636	45702	42067	21074	22123	24550	21664	35758	31823	33086	31265			45138	43559	43475	41246	51326	57049	41845
72	16052	43195	40079	37304	41801	40360	41273	41137	43816	42827	45167	42204	39441	40838	43626	39060	40531	41138	47065	41008	18298	18157	18512	17742	43936	44433	42823	42234	42849	44014	42429	43447	27357	26450	24837	19870	36024	31235	34658	32175			45617	43834	41417	41878	49703	49365	44269
75	16503	40893	39720	38402	41595	40480	38157	39911	44061	46460	45504	43900	38685	39229	39967	39613	40264	42481	45831	39606	18872	18109	19287	17804	42157	44101	42327	42867	44293	43481	43891	44027	25182	22529	24783	23329	37152	33137	34245	32314			47826	47702	39600	41008	54296	48745	47098
78	17154	42671	42459	40981	40925	42708	41254	41159	43906	46064	45492	42456	39194	40464	40580	39709	41551	41218	46108	40256	18810	18288	20629	18994	44361	41952	43490	43693	42488	42630	43475	43317	25731	26093	27974	24446	35409	33366	35735	32190			44950	46602	44665	41632	49846	53690	45169
81	18118	41928	43032	41489	40205	39572	43387	42052	44755	47183	47365	42501	41853	40805	39865	41783	41253	42981	43877	39027	19877	18494	20748	18487	43030	44340	45061	42507	44079	42965	43699	42997	28629	28435	27994	25243	38687	34380	35623	33468			47607	44566	42287	42971	51211	53897	50159
84	18735	41541	42085	41882	40095	40451	43184	40870	44706	46460	46681	42963	40174	41936	40187	40070	40731	41985	46745	40273	20447	18228	21534	19325	43161	45426	46521	41440	40807	42473	44007	43458	26753	27225	29444	25380	38047	35612	37576	34036			46704	42149	45522	43845	54698	47733	48974
87	19520	41247	41957	40003	42381	41221	43371	42497	44955	43139	45966	43610	42714	42843	41569	40902	38188	42030	47041	40306	21083	18776	23193	19819	44383	43862	46357	41405	45007	45098	42245	43633	31977	32304	31481	27869	40331	34523	36669	33899			49197	50496	46555	40546	56144	61122	47885
90	22215	43645	41825	42005	42782	42393	44123	43334	45242	43574	49711	44092	41170	42630	41671	41295	40608	42308	47927	41604	22267	19597	24050	20142	45143	45219	44604	43894	43559	43868	43882	43472	31164	32147	32512	27377	40886	36295	38514	34417			48061	42149	44674	40722	52973	46819	46272
93	23353	40082	39984	39549	43305	40557	44935	43327	45978	46842	45689	43741	41481	40760	42338	41907	41310	41617	49298	41933	22731	19468	25637	21384	44757	44836	45987	44010	44718	42262	43586	45259	33856	31495	29611	30773	43062	34994	39227	37089			47061	48412	45545	40213	53404	54784	45540
96	23285	42012	41869	41137	43249	41533	43309	42612	44988	43710	46115	44719	42456	42676	42398	42039	39752	40067	49454	42548	24122	20794	26736	22849	44736	41881	45909	44196	42089	44855	46488	44712	30200	32031	31039	28191	42759	35732	37942	36117			48666	45258	44243	42232	52408	50857	47834
99	25738	40148	41122	39817	41788	41707	44110	42523	45638	44842	46596	44948	43119	40946	43271	43184	41070	40440	49137	41146	25690	21299	28261	23339	44017	43968	44311	46501	43918	44668	45101	44308	32994	34317	34197	34313	41296	34983	39595	37463			47483	46538	43349	44364	55115	51204	50965
102	26172	40997	41587	39490	41207	40491	41379	40838	45795	44642	48144	45171	41310	42980	36560	38906	40427	42048	46513	42289	26561	22612	28714	24549	44492	42503	42993	43273	42503	43927	44499	43914	31502	34315	30139	32250	41347	37372	39955	38698			45928	46095	42130	43145	60741	59238	48226
105	27614	42242	40028	39709	40885	41449	42457	40296	47054	42614	51123	45361	42688	39926	37877	38802	40863	39794	47794	42014	28989	23333	29968	26122	44579	43014	43630	44015	43040	46620	46417	44644	31177	33593	32558	34863	44780	36001	39602	37315			45660	51891	39792	43472	53855	55929	49224
108	27876	42792	40724	39073	42026	42351	43868	40615	47144	44844	49050	45712	41764	41774	37460	40906	42916	41707	48886	42688	29955	24689	30931	27858	44644	43145	43394	43108	42518	45417	44856	43602	39590	40329	30697	33605	47212	37084	41241	39297			47000	49117	42773	42168	56697	51149	46710
111	28251	44714	41593	40570	41466	40553	40306	39848	47425	44141	51313	45950	40525	42510	41817	41292	39165	42831	49156	41390	31596	25826	32129	29442	45119	41872	42696	43803	44207	44403	46025	44882	33992	34167	31489	34680	45069	35630	40888	38417			50839	45088	42831	42703	53060	49608	49734
114	28918	43052	39883	40583	41640	40154	46100	41792	46588	41964	48702	46048	41902	42597	39579	39812	41414	42037	46354	39866	33271	26106	33822	30172	45792	43560	44456	43837	44036	44351	46464	43715	35699	34510	31660	33970	44542	37784	41718	38916			48037	44566	45123	43814	51896	54221	45189
117	29736	43392	43044	38087	43414	40583	45583	42393	46879	44490	51007	46990	41009	42920	37056	39313	41098	42269	44578	37391	33770	27348	34718	32181	46616	42503	45715	43063	43412	45304	45773	45742	36939	33227	31924	36781	44523	38715	42021	39991			51120	41867	46283	44287	49757	50506	51824
120	30075	42338	43160	39618	43578	41008	43352	40463	47163	42967	49460	47017	42158	42979	40413	41602	40924	42198	49481	41975	35467	28627	36566	32895	44373	46185	45545	42886	42414	45954	45808	45299	35494	34750	33470	37556	49269	38818	42350	40844			46180	41015	46074	43781	51165	58430	45124
123	31520	41409	40595	40069	45179	41052	44291	42473	47219	43619	49131	47367	42681	41610	39325	41333	41019	42517	46173	41009	35272	30710	37850	33499	45841	43731	43147	41470	44126	44140	43922	44423	36387	36628	33040	36378	48662	38372	42343	40439			49017	48114	45931	44090	54215	61212	44428
126	30753	43138	40775	39875	47052	42729	46355	42070	47818	43897	49313	47937	42599	42924	41774	42694	40604	43370	47313	41471	36962	30671	38053	35231	45948	44011	46378	45110	42925	44180	45960	45872	40177	40817	33644	38270	49591	38592	43886	40894			51371	53136	45609	47226	58773	62409	49492
129	32069	41645	43808	41302	43643	40205	43440	43492	48134	41628	50257	47759	40826	43218	42744	43984	40496	41376	47157	42614	38551	32967	38889	36304	44442	43782	47854	44654	43578	43848	46143	45447	41630	41313	34018	36955	49196	37962	43213	41360			54990	48843	46314	41836	67929	57961	47300
132	33079	41774	42182	39806	41907	42303	44630	42689	46960	43908	50022	47145	41373	42678	42223	42903	41148	41043	48284	43179	39446	34077	41695	38274	45352	45268	46245	44071	44001	45320	44984	45693	40383	42216	35379	37500	50343	38451	42956	40926			47283	50749	43088	43384	62332	55688	51114
135	32553	41676	42512	41149	42315	41468	43554	41478	47311	42507	50322	49123	39438	43598	40466	41954	39714	43720	47240	40895	41633	35331	42010	39241	46339	44360	46840	44406	42917	45492	46031	46434	41512	43088	34223	37966	50109	42480	45895	42813			50158	44895	43885	44954	58601	53355	51317
138	33064	40402	39491	40001	40552	40385	44091	39877	47569	43488	51203	47720	41236	40984	40682	40070	38974	43702	45303	40266	43077	36096	42400	39538	45304	42519	44367	43883	43180	45301	45755	44280	40582	43318	36981	36800	49435	42436	45116	43510			48630	47763	46299	43573	62901	59081	44682
141	33484	40923	41165	39331	40742	40079	46355	39601	47826	44151	51225	47949	43700	41484	39240	39723	39896	43991	47920	40128	45221	38325	43951	41241	44564	46676	42024	42283	45049	43700	45645	43738	42126	40368	37899	35793	50335	40553	45778	42565			45425	47991	43384	44509	60901	65478	49699
144	33288	43497	41791	39641	43836	41914	42244	41655	48743	42525	50687	47960	39450	42857	40534	42830	40353	43119	46891	39590	45470	37801	44439	42241	45637	43401	44218	42720	43514	45350	45059	45466	41983	43774	36233	36969	50937	40737	45731	42013			52236	44024	44557	43660	60693	61294	46289
147	34033	41764	43362	39824	41673	41878	44749	41685	48688	43676	51631	46972	40088	41742	39322	40464	41858	41512	48174	38964	46315	38190	47024	44503	46489	44290	46596	41971	42228	42786	45840	43720	45276	39502	35410	40161	50147	42354	45301	41889			47569	43950	46359	44587	60050	52327	49241
150	33708	44032	41687	38111	45703	42155	44222	41564	48563	45103	51283	49855	41024	42098	38912	40372	40892	43332	48601	39663	47906	40679	47945	45826	46363	44163	44682	43304	43602	43982	46198	45287	40374	44973	36439	40572	51010	43107	46892	42595			53020	46607	43828	41762	58897	57231	49606
153	35526	39669	41395	39238	43308	41880	44433	40697	48169	42877	51466	48487	41282	42501	40491	42267	40878	42525	46170	40008	50461	41223	48647	47056	46334	45948	46438	46182	44926	43080	48819	46334	40029	40835	36006	38227	51770	40764	47011	42625			49249	48921	46246	42268	59917	59151	51709
156	35915	39358	41115	41604	43644	41573	43471	41999	50052	43674	52609	48672	42745	42896	39760	41602	41675	42934	47642	39966	49869	41544	48159	47867	44773	44393	43949	44654	44211	45968	46020	46011	41585	41898	36552	40680	51945	43212	46168	43213			53409	43663	45460	43719	59998	65501	50666
159	35264	39876	40341	40440	40843	40992	42280	39809	49000	44186	52062	48044	42321	42780	42386	42841	41159	40883	49360	41907	53216	43105	49919	49009	45701	44592	44636	46285	44028	44860	47245	46696	44330	46784	37764	40910	51378	42576	46901	43596			54004	50416	45244	45614	60600	61869	49028
162	35615	42028	40973	39476	42693	40364	44293	43006	48753	42942	51536	49738	41826	44053	42985	43244	39743	43236	48961	42053	52631	45463	51224	50309	46351	45880	46384	44294	44204	44068	48590	47042	41938	43990	36985	41591	53054	40436	47924	42567			53424	52423	46485	43867	62409	54327	51367
165	35530	41207	41984	40388	40615	42571	44683	43340	48653	43638	50984	49946	42581	42502	43805	44029	42446	42220	48567	41700	55279	45239	51452	50213	46688	42377	46536	46342	42618	44904	48895	45571	41756	46964	36828	42922	53260	43394	47982	41896			54920	49346	41687	45610	64072	55136	50205
168	37000	39311	41851	40877	41069	41645	43985	41996	49105	44028	52003	49533	41780	41927	44143	40724	42295	41250	48554	41327	54563	46339	51983	52609	45469	44112	46638	45120	44734	46566	46775	46343	45569	45027	37943	42493	52926	43078	47713	45393			48924	45295	43887	42153	63976	57194	48061
171	34957	40569	41815	39757	40429	42385	41173	42366	49481	43567	51514	50089	42372	42621	39864	39471	41949	42656	47121	40949	56398	47774	54497	53477	46103	43630	44101	44670	44251	45573	46845	46516	47264	46997	41212	37516	53824	39800	48324	45421			51038	45755	42476	42475	58304	53899	46871
174	34866	42736	41770	40326	43059	40726	42613	42016	48277	43510	52628	49182	40987	42756	39075	40014	41790	43916	46509	40255	57243	50377	53277	53472	45145	43210	43049	44218	46073	45952	45234	45608	47362	45402	38751	37943	52389	42943	49217	45452			50717	47830	43340	40817	58645	60306	46423
177	34973	40865	41541	39954	41973	41451	42586	41325	49261	44677	53019	49835	42725	43668	44526	42217	40272	43486	50250	40382	57177	50276	56068	55387	46959	45368	45511	43852	43447	47474	46784	46925	46672	45216	40014	39487	52381	41174	49017	47563			49919	52759	44081	42798	56470	61155	51150
180	33638	43418	39917	39204	43458	42310	42730	42536	48556	44573	52972	50210	41745	43586	40344	40200	41453	41885	46960	40310	58404	52048	55139	55496	45535	44261	44869	44256	43448	44923	46604	46482	45353	44356	39499	40665	53784	42047	48600	43561			46399	50426	42903	41996	58748	60374	47011
183	35421	43623	42340	40930	43664	40912	44841	40450	49293	44077	52807	50430	41076	43692	42123	41625	41626	41295	48890	40362	58734	50907	56801	57223	46870	42854	44062	43915	44761	44844	45592	45682	47021	44084	38049	39364	52006	46346	48032	45001			50751	46317	44283	43284	63762	61512	49598
186	36746	40709	41615	38682	44906	42714	46059	41540	48811	45223	52582	50291	41508	43360	40051	39191	40669	42738	49390	42139	60217	53235	56231	56879	45582	44833	46731	43684	43664	45713	46772	46753	47965	46660	36411	42152	53577	44305	48292	44399			49473	49299	43666	43739	60294	53600	50363
189	36268	40752	42164	40021	41896	42193	45412	41233	49982	44228	51761	51656	41193	42477	42767	43280	42889	42430	47765	41065	59460	52853	58557	57305	46462	44065	42235	43308	44350	45687	46679	44968	47544	45904	38554	38285	52304	44881	49162	42572			48776	46159	42472	42868	58474	52681	46348
192	34132	43082	41116	37500	45232	43943	43869	41709	48103	44927	53629	51062	41844	41209	41068	41125	40318	40726	49155	41557	61520	53632	58183	57442	47252	45932	43424	42291	47355	47573	46249	46421	45536	48677	37282	41432	53731	43084	49554	44995			55851	46151	41898	44167	59821	61575	49043
195	36430	45964	41400	40325	44441	42580	44125	42913	49620	44339	52892	50004	41342	43402	42378	43582	40726	45159	50543	40876	62264	54075	58547	58142	47194	43542	47303	45450	45608	43302	46247	47878	48109	51628	38578	39557	54832	44585	47085	41325			54045	47790	47428	42300	59156	61662	49298
198	37787	42002	42112	40446	41461	41813	43575	40770	49904	44473	51910	50474	41308	43093	42146	41927	41905	44390	50575	42516	62423	54854	58727	58751	46841	45181	45470	44214	45452	45882	46434	46792	47296	48491	36418	39309	54399	45013	48787	45687			49855	46011	43293	42381	55799	61778	47514
201	38318	42158	40713	38847	39673	41293	44141	43562	48969	44672	52291	50544	40549	44557	41185	43421	40688	42499	49744	43248	62202	54946	60656	59637	46563	45700	41877	44148	45491	46771	46549	45704	45056	47865	40415	40878	53748	42928	48772	44175			52300	43725	40724	44162	56940	61907	51234
204	34636	40618	40358	40023	42051	40344	42044	41517	48680	42827	52873	50568	41509	44345	41381	42386	42827	44177	48411	40931	63422	57517	61399	61135	46044	42432	44976	43681	46972	46680	45917	46552	46489	48568	38793	43004	54234	42267	49772	44407			56281	51525	40083	41509	53069	64637	48309
207	37880	41172	41183	40629	40106	40162	41018	39645	49202	43886	54316	52128	41266	45619	44021	41878	42496	43220	51129	42116	63870	58414	59535	59709	45451	42261	43928	46359	44583	49464	47344	46534	47574	45682	38407	41939	54906	45684	49437	46157			52195	53553	44432	43830	61722	63206	45592
210	37386	41745	42106	39304	41656	40510	43787	41134	49823	44389	51846	50461	44807	44074	42711	41454	41425	44007	50177	41267	64916	57363	60405	61163	46160	46430	46056	45443	48102	46752	45628	47766	46522	51484	39713	41175	55033	42995	48972	47846			51011	52365	39514	41151	67672	66168	47889
213	38325	44582	41497	41871	43829	42186	45314	41825	49559	44627	53157	50393	44235	43905	41396	43461	43328	43358	50360	41396	65307	58349	62785	61964	48236	46072	47967	46022	45248	46934	46733	46940	49659	47408	39779	41078	54999	47736	49821	45031			55247	50534	44220	44637	64191	59833	53419
216	37281	41310	41063	38964	42489	40943	44366	40571	49510	45371	52289	50588	43140	42592	42971	42725	42118	43689	50401	44005	65772	58390	63265	63149	46950	46439	46326	45149	46175	46933	46966	46848	49294	51109	39537	39871	55520	43021	49613	46155			53090	51883	43698	40910	70574	61296	47473
219	36113	42793	41358	38806	43179	40682	45104	40606	49321	45751	54136	51068	43451	43598	43963	43559	42673	44444	50255	41044	65880	58485	59324	61027	47665	44328	46024	44033	47174	48002	45488	45813	49127	48350	40137	41662	53999	41478	51005	46874			54024	52625	43448	40667	71853	62262	46124
222	37248	42785	41419	39606	42688	39444	43770	40452	50322	43676	53365	51147	43051	45784	41777	42560	43290	45319	49426	44564	66026	61826	62654	63870	47486	42109	44900	44924	48583	49257	45763	46550	46069	48800	37124	40439	54260	44765	49382	47046			56076	55158	42496	39412	63735	63345	46950
225	36634	42426	42686	40578	42405	39927	42844	43376	49036	44684	53789	51979	44295	44295	44146	43888	43467	46245	50495	43635	65034	61958	59587	63282	46878	45246	43418	45711	48777	50494	47516	46544	47909	48916	39098	44158	51424	44508	49572	48891			54084	53656	42593	41240	69758	64462	48725
228	36615	41740	40698	39275	41608	40942	44232	41919	50228	44396	54572	51269	42962	44239	44449	42771	42664	45916	51816	42803	65899	60703	63135	64662	46936	43513	44671	45231	47362	48085	48197	48527	53353	47675	40503	40067	52421	44871	48600	45874			53855	50853	40652	44299	64340	65651	47064
231	39321	43081	44325	38554	41255	40925	43999	43298	49925	42525	53727	51888	42167	44661	43116	43801	43064	44803	50085	42754	67676	61270	62867	61893	46111	44623	45319	46164	45220	48280	46906	49059	51010	48513	41025	41243	53713	42000	49836	45462			53581	53019	47332	42763	61326	62482	47880
234	39970	42709	40675	40818	43345	40091	43925	42062	50815	44999	54363	51910	39644	43869	42137	43204	42872	45467	49388	41279	66748	60509	63344	64741	47770	45058	46782	46916	47517	47061	49801	47097	55980	52061	39897	44145	55524	41642	49117	44774			54445	50074	41090	42915	62402	64090	47185
237	38150	41122	40941	38195	42149	41499	45323	40403	50107	44256	53943	51486	41261	41832	42314	43000	43039	42494	50637	43299	66187	60994	65441	64036	46806	43329	47403	44404	48201	48100	46665	48028	50371	50948	41169	40044	54626	45721	50121	45905			54538	53131	41572	44578	61905	63431	49314
240	35263	41822	40822	38075	44019	43084	44797	41627	48920	44452	54167	50867	43243	44907	43602	41623	42504	44265	50617	43655	66659	62416	62871	65448	46967	45336	44420	43450	45503	45673	45653	48242	53075	52241	42194	38592	51630	44436	50841	47449			53935	51179	39770	41386	59777	57241	46360
243	37656	45285	41392	39615	43286	43552	44715	41561	50178	44572	54207	51284	40415	44200	41056	43261	41807	43248	52665	41768	67489	61799	64515	66695	46581	45507	44484	45239	46188	44965	47922	46535	51533	47835	38492	43115	54998	43705	49461	47131			49026	55804	46320	42574	53105	59164	47051
246	37186	44914	40648	38514	41109	43548	43558	44762	50343	43718	54986	51551	41694	44957	43878	43146	41992	42943	48853	44686	67942	60805	63396	66506	46552	46328	46668	42752	45323	47001	46250	47152	48293	50632	39206	41490	54706	43697	49237	47400			53665	50502	40398	44330	62575	59808	47720
249	36011	46759	42378	37906	46022	42227	44122	41757	49715	44543	54239	51146	41898	43920	42186	43264	40844	44153	51077	44577	66523	59402	62989	63630	47683	47607	42005	44119	47332	46160	47372	47044	53389	53063	45092	41496	52478	48258	48801	46133			53487	53379	42561	43663	62079	68960	52284
252	37724	45007	40918	40468	45142	43242	45726	40810	50198	45757	54790	51447	39844	44498	43335	41216	40981	44099	48316	42166	69176	63408	63521	63809	44721	44162	45553	44947	46779	47772	46803	48264	50943	50861	40146	43023	54848	45799	48689	47427			53243	51466	44321	45491	56391	66148	52323
255	40910	39019	41808	39273	40607	41302	45837	41659	49717	44468	54586	53674	40469	42949	43848	43417	41688	44580	52301	42851	68106	63303	63833	65511	47788	45310	44151	43574	44857	47865	46208	48552	53693	51514	42134	41279	53249	48558	48154	44543			54686	52239	44657	46482	53472	61552	53773
258	37865	41052	43431	40897	43372	45430	45261	41682	50777	45606	54094	51211	42291	44769	42583	42802	42251	46558	50560	42272	68571	62635	64305	65396	46697	46331	45159	44082	45174	48393	46966	48442	59345	50666	40970	46049	54695	43936	49654	46905			54836	51696	44849	43622	54480	67762	48760
261	37537	46208	41691	39461	44904	43298	45679	46029	49586	44862	55464	51830	39417	42894	43595	43661	41459	44312	52702	42736	67801	61265	65188	65308	47523	46501	48999	46336	47236	46756	46925	47678	56806	49236	41301	44795	55137	46337	47218	43299			54626	53920	44936	45848	60760	67890	49835
264	38785	42280	43671	40464	40751	44805	46018	43822	50030	44419	54986	52372	42513	42755	43401	41968	41522	44990	52750	43189	67479	63083	65360	66536	47009	46569	46866	46345	46142	46492	47730	47559	56312	50344	39779	42275	53252	46755	49846	46430			59054	49528	42452	47676	52353	68819	50715
267	38210	43634	39845	39762	42139	40656	44058	41864	50207	43609	55593	52037	41660	42058	43313	42456	43027	43517	50613	40666	69054	65395	69516	64538	46170	43543	42826	45513	45327	49647	46599	46003	54041	50760	41640	43226	54900	43797	49661	45487			54120	52473	40850	42976	61822	64093	45936
270	36363	45452	40360	39721	44416	41368	43823	42269	50034	45353	55161	52770	40775	43459	43241	44132	43877	43786	50467	44045	68428	64184	65077	68325	48431	46662	44620	42903	46961	48581	47543	47503	57592	54164	42784	39822	55746	46625	51217	48417			53209	52799	41515	41116	62977	58794	48243
273	39683	43039	41623	39551	41441	40819	42980	42436	50680	45264	56140	52224	42186	41981	39738	42120	43084	43417	52468	43587	70927	64174	66623	65789	45621	46737	43848	43813	46560	51872	46749	48009	53431	52849	40736	41899	53768	46590	51213	49443			52951	51701	40045	42369	63371	61377	46486
276	36086	43821	40707	38910	41775	45344	44701	44070	50509	45584	54831	52193	41548	44088	42822	42394	42558	42983	53311	44069	68941	64219	63954	67911	47981	45955	45730	43766	47089	47475	46084	48272	54222	54181	43017	39615	55381	44325	49528	48139			52768	50887	42041	44386	59780	63917	52925
279	37599	43874	42454	40491	42054	44906	47163	41870	50024	44989	54649	52590	41909	41234	42552	42095	42020	44901	51356	41716	68749	64081	65070	66863	46939	46052	50604	44911	46879	49197	46330	47226	54922	53547	41253	40730	53213	47645	49242	45537			50783	52816	43822	45548	66170	55773	53166
282	37618	44607	40603	38386	44479	39896	46761	41297	49690	44714	54775	51526	39455	42040	42859	41288	40277	43564	49900	42251	70219	65682	64794	66878	47862	45570	45919	46318	48136	47863	46836	49019	56295	51127	41458	43466	53036	46106	49377	46947			57588	51802	43277	44798	60431	63751	52205
285	38108	43598	43061	39931	44411	44744	45791	43205	49253	44734	54566	53128	40987	41775	44821	44323	41837	43233	51674	42953	69603	65199	64282	67320	48074	45206	49167	45996	46077	49978	46621	47835	55705	54987	44256	44228	54502	48332	49127	46063			56013	51662	43954	46691	65950	61005	49459
288	40222	42587	40493	39483	43145	44130	45291	44258	50586	44543	54776	53282	39311	41771	41901	43114	42579	41590	50538	42338	69998	65543	64750	69021	46542	45310	44372	44602	47188	48419	46320	47981	57909	51375	41156	41424	54173	44384	49906	47388			58019	51244	41796	43248	53460	64666	50559
291	39397	43493	42043	41322	42165	41963	45159	43767	50565	44958	55357	51784	40985	42225	45036	43432	41229	44107	52722	43656	69057	66270	65614	66170	46559	48903	46877	46342	47687	45413	47262	48525	55186	48916	43226	46162	54782	43564	49287	48101			54535	52312	41753	45186	65541	67713	53417
294	38180	46117	42074	42394	42663	44663	45138	43159	51324	44833	55091	51498	41487	42391	40101	43855	42870	43732	52965	41641	68457	61108	68310	67772	47885	45728	47213	46244	47273	47006	47466	49736	56484	52024	44846	44122	53860	42834	50230	46803			57722	54320	42524	43915	65201	64718	49034
297	39306	43347	41142	39294	43265	43412	46691	42711	51043	45426	54763	52892	41863	43943	43777	42161	42342	43156	51969	42753	70206	66121	68924	70169	47998	45442	49104	46904	46374	47468	49359	48989	54714	50886	44854	46886	53424	43990	49708	45610			56611	50353	43103	46584	61019	65693	50330
300	39563	42947	41312	37859	41907	42055	44055	41207	50744	46007	53594	52883	41294	42360	43493	43050	40784	44127	52292	43706	70144	65397	66078	66854	47523	45989	44208	43416	46737	46504	48401	49053	59846	52253	45633	44743	54890	46572	49841	48842			54135	52777	41575	42660	56896	61673	48214
303	38726	43679	42568	39158	43570	42182	44567	41234	51430	45157	55246	51724	41096	43611	43753	42497	43571	44430	49957	42206	71605	66374	64656	67263	48896	46118	45146	44294	45153	49129	48610	48889	57453	55622	42312	44496	54480	45011	50837	48343			55959	50545	43959	39467	56629	62842	49701
306	40180	44363	40497	37147	42423	45740	44862	42057	51009	45959	55585	53373	42830	42877	43663	42133	42037	45265	52299	44145	67691	66432	64069	66604	48494	45269	44785	45346	45675	47460	46948	49167	55212	52479	44362	44680	52271	43721	51009	48948			57102	53446	42296	42719	60566	57892	47741
309	39109	45268	42577	40242	43441	43405	44630	42369	50765	45966	54739	52559	40598	41122	40459	43064	40589	44250	54112	44402	69121	66770	67266	67685	47942	45818	44856	45942	47336	47960	48163	49884	58613	54150	42767	44431	54260	44894	49780	48115			57191	51259	44560	45102	58470	57248	49041
312	38517	44768	41119	38207	46044	44554	46614	41259	50877	45931	55212	52648	39685	43314	41258	42271	43170	44194	49519	43234	70516	67802	67942	68851	46679	47372	46399	46310	47243	49105	47086	49310	58377	57195	42538	42853	51939	45080	51250	47482			59927	53037	43972	43718	63356	67254	48574
315	39300	46750	41455	37899	44236	44341	45222	44145	50906	44785	55622	52533	42150	42588	44292	44988	41682	43755	51142	42942	69405	65304	63895	65867	47714	47686	44804	46424	48111	48413	46291	47424	58665	61242	42458	44906	54788	45960	50967	46194			57549	51080	41100	42911	61836	68618	44800
318	39526	43820	41079	39554	40823	44777	46763	41259	51185	45931	55554	53486	40181	40353	43404	41572	39658	44884	52531	43413	70017	66453	66443	67827	48491	46662	45395	45121	47196	48858	48256	49204	58220	53986	42203	44529	53543	46354	49141	48430			58173	50598	42215	43408	58729	63169	52407
321	39193	44644	41499	40537	45620	42271	43606	42096	52082	45320	55647	51425	40952	40408	41606	41385	40255	43626	48798	41419	68524	68017	66908	70630	47472	46195	43997	47334	47102	48743	48525	49224	57290	57272	43210	42436	53013	47320	49991	46697			58339	51161	44578	44953	60284	71603	50508
324	39470	41364	43393	41150	42573	43765	45371	44895	51598	44300	55266	53371	39825	41533	43226	42362	42582	44368	51610	43237	66420	67552	67802	65919	49090	46926	45418	46129	46612	49528	48286	48412	58189	55190	44071	43844	52759	45674	49876	45701			58329	52121	43281	45975	63579	67226	48860
327	37361	42219	43670	41920	42123	43854	45862	46057	50866	45682	55265	53145	39921	41639	42684	42828	43234	45511	52773	41916	67796	65761	69763	70504	47286	45482	44723	45885	47641	48708	48653	49302	55735	58139	41960	44143	54355	45657	49477	49196			53677	52360	43290	46488	61266	67567	51167
330	38724	42796	40603	39136	43692	41279	46661	43423	50735	44930	55204	53597	40518	42273	45170	43333	40921	46174	52411	41483	72622	66323	64456	67492	47998	45462	47556	47087	46003	50898	48544	48912	53704	53681	43963	46427	53947	46135	48858	46805			52734	51003	42867	41904	62164	63243	50854
333	36344	42216	42877	40905	41043	42559	43270	43177	52278	45921	55794	52370	42726	45673	42004	41300	42955	43967	49752	41753	70466	65545	67937	70117	46414	44984	41699	43788	48496	49101	46323	48988	57414	53150	45853	43481	54248	45927	49668	47918			55717	51976	41307	42150	72471	61009	46663
336	39095	44379	41552	40054	44503	43421	45541	44086	50285	45659	55480	52282	42892	43706	42656	43273	42260	45369	55411	45208	71193	67048	66866	71665	48468	46214	44382	43157	47502	50097	46091	47128	58114	58373	41244	44336	54231	44962	50499	49365			50613	52161	43000	43103	61882	67326	48594
339	38632	46807	41995	38840	42254	45825	47250	42360	50443	44712	54947	52871	42336	43884	44556	43180	40781	46048	52420	43273	71117	66346	67928	70484	48275	47371	44335	44776	47798	48375	46649	49203	55828	55897	42047	44178	52968	46257	50594	47620			54714	53516	45859	47313	64981	57405	51037
342	39065	42626	41276	39521	43417	47395	45135	43060	51403	44814	56105	53078	41626	44046	40132	42597	44783	44457	52557	44313	68246	66348	66575	69457	48634	46135	46721	47004	47601	47876	48323	49624	63286	54833	43778	45748	51604	45324	51986	48658			57009	51744	42406	44365	68853	69373	48052
345	39511	45409	40976	38514	43930	43056	46013	44541	51404	44922	55885	53518	40479	43771	42912	42266	43495	44276	52800	44559	68125	66730	66601	67601	48141	45956	42807	47693	49721	49931	50633	50260	57178	60030	46156	47366	51704	44801	51434	45889			59198	52290	44685	45444	61722	72735	45489
348	41612	43384	38899	39721	46072	46109	47312	41528	51884	44121	55570	53560	40054	41075	41886	42416	42217	43896	52629	43694	73551	68827	66587	69204	49166	44320	47009	47240	48845	48011	48035	47193	61703	59902	45373	44829	52132	46207	50399	46192			58366	51451	40994	42363	65481	64712	50899
351	40312	44062	41651	37694	42525	44989	45368	44620	52365	45655	55614	53385	43255	42289	43966	43657	41801	41392	51890	42235	70410	68969	65620	67158	50107	45706	45511	46381	47117	49888	48358	49328	61802	55348	43419	43005	51577	47150	50772	48449			54404	51110	45840	45857	64198	69396	49854
354	40957	44932	42910	41169	45227	45003	44932	43182	51888	46760	54772	53059	43665	41321	42581	42746	41321	44349	54116	43473	71908	68575	67593	68089	48283	46806	45269	45644	46920	50140	48302	49254	62831	56125	44817	44536	50976	43173	48301	46685			58736	51977	42504	44021	59224	71652	51656
357	38119	44975	43122	41687	44069	46572	45610	43760	52287	46131	55475	53110	41544	42290	43928	43256	41463	43239	50877	41888	70995	67990	69247	67966	49499	46697	45387	47147	48056	48537	49618	50093	61114	58134	44143	43448	53451	45774	48910	48605			57875	53819	44848	46986	69803	59464	52731
360	34671	42387	43646	38913	43616	42108	45930	43822	51135	45543	55760	53115	40956	43698	42508	43798	42685	44433	53149	42115	69999	68272	68772	71015	47655	43770	47142	48170	49957	48800	51039	48923	62599	55551	47356	45707	51449	47580	50336	48816			57900	54468	42454	42696	70752	66219	51615
363	37292	43576	41016	38836	44155	44849	46720	43181	51703	45449	55966	53471	40685	45280	43504	42993	42595	45217	53971	40743	70474	69211	68637	69151	47945	44979	48192	48028	47489	47251	49721	49118	59463	59239	46415	46788	53663	46209	49752	47644			57486	53556	42901	46114	63714	65116	49599
366	38035	42667	40090	39045	41044	42881	44026	43990	51915	45887	55415	52841	42949	44349	41950	42877	43953	44576	52022	45062	71720	68251	65313	65486	49798	43474	44170	43840	49105	52949	47731	48663	64272	60017	46343	42151	49293	42091	51913	49502			56620	52806	45742	42977	67551	67080	45227
369	38227	42847	39593	39148	42889	46751	44450	42804	51028	45058	55835	53608	41430	45864	44059	40724	41539	45721	53140	41996	70257	67957	65476	69285	49055	48067	44152	45861	48761	48961	47375	47988	60065	62441	48295	45899	50526	43896	49334	49313			56998	52809	43694	44157	70078	69019	47055
372	38708	44800	41451	37944	42996	46909	46377	45151	50809	45302	54463	53489	42804	43148	39859	42771	41496	44583	53979	42160	73007	69329	63022	66352	48688	45604	45193	44370	49645	49864	46669	48755	60628	59717	44660	42931	53844	42752	50928	47997			56724	47786	44376	42369	69986	66928	45400
375	38341	44263	40385	37802	43694	45197	45199	41379	51400	44919	55037	52893	41562	40681	42475	42238	41835	43489	53389	44275	67981	69394	70063	71851	48588	45336	43035	46275	47885	49501	48678	48341	63094	58686	42516	45600	47319	43483	48962	46678			58522	49982	45406	43995	67466	66894	46125
378	42177	44388	39488	38264	43276	47772	46972	43296	52187	45624	56011	53353	40471	42061	41400	42172	42309	44412	52595	41663	72444	68983	67096	68698	47810	45243	46041	46455	50161	51962	48329	49527	61440	60708	46123	47248	50632	43094	46607	46238			59318	51977	42091	46208	64840	67242	45107
381	39646	42985	39380	39074	42897	43828	47481	43714	51427	46055	56505	52561	42559	41918	44043	44508	43460	43973	53386	41722	71997	69774	65620	70194	47606	45579	45442	46524	48442	48832	47731	48244	59262	65422	42373	47213	51671	45617	45624	45428			60743	50011	43899	46396	68644	67718	48658
384	38922	42511	42216	39055	43287	47752	44497	43201	51332	45245	55588	53079	41305	42546	42328	42939	41510	43932	51484	44268	71076	68163	67728	70166	47843	45820	46048	47144	49164	49648	46908	47726	62990	62520	44152	45311	49315	42730	46928	45164			62129	52110	44576	43987	64556	69444	47229
387	36599	45867	39784	40764	44585	48069	42859	41349	51242	45788	57327	53471	41098	41677	41392	40318	40247	43977	51159	39926	70435	71564	64084	67424	48590	47687	43158	44275	51761	51095	47392	49350	64548	66625	47684	45442	47654	41256	46893	48299			60476	54515	43159	43165	64719	66240	44455
390	34906	45455	43193	39165	45942	46627	44746	44272	51826	45138	54752	53443	43182	42249	44762	42722	43190	44745	53102	42130	70800	67592	66505	69229	48921	47330	45787	47334	53094	50904	48586	48984	65401	63669	45359	48658	50770	43173	46155	46538			58127	51102	42556	43816	67580	69014	46374
393	37195	45205	39458	39036	45160	41887	46398	43430	50891	44761	56042	53318	46074	43272	43220	41816	41834	44631	51110	38845	71111	66820	69332	70820	48071	44807	47400	47599	49922	50331	46887	49028	60475	58517	45607	44860	49433	42572	46076	43798			57835	54395	46518	44587	61755	68559	46109
396	37158	42824	39778	40156	47301	42769	43575	42625	51955	45081	55486	53301	44569	43887	40554	41434	41558	45364	52397	44018	71245	66741	66517	70402	48662	43986	44039	45598	47906	51906	48121	47898	62549	59721	46125	44567	51321	44103	48750	43955			57476	52179	44138	41459	65756	62653	47989
399	39386	46404	42519	40079	43804	45417	47247	41323	51326	46073	55928	52608	43409	42576	43693	43566	42738	45966	52689	41804	70964	70108	68639	71079	48416	47596	44509	44733	47135	49172	47565	49649	62840	63505	49053	47520	52905	41179	47167	44462			54690	52944	43923	44932	70948	63461	49424
402	40724	45621	40513	38243	42501	46193	45320	44813	51164	45429	56667	53975	42994	42172	40719	41316	40554	45291	53495	40902	71200	69203	63801	65276	49228	47640	46939	44545	50149	51119	48058	48991	62238	61497	47956	45374	51674	42283	48358	47126			58849	53241	42137	42538	71301	62527	52973
405	38594	45639	40960	38870	44057	46018	47314	43091	50714	45534	55569	53473	41499	41214	43792	43752	40394	44725	52782	42161	68415	70420	67676	70991	49034	45347	45727	45282	49418	48604	47117	50110	66135	66380	44313	46258	50219	45433	45323	42315			59062	48772	46615	45070	63626	63057	45846
408	41801	42795	39933	39751	42320	46668	47189	43325	50869	45258	56749	53451	40492	40508	42430	42540	42313	45010	53792	43904	71484	68107	69159	71022	48391	45636	46757	48731	49787	50032	48072	49897	64341	65170	49481	48269	52139	43150	44482	42329			57288	51136	42408	43799	64914	62462	46210
411	40820	42986	39527	40750	43053	44876	47117	44690	51667	44896	56046	53850	41961	42545	44067	42892	44413	42561	53344	41285	70662	67912	69018	69612	49068	46785	44912	45364	48554	51071	47575	48309	63562	68764	48071	47611	53072	45889	43782	45116			61023	52775	46584	44639	70140	63703	45701
414	40581	42913	39202	40127	44910	44677	43257	43152	51411	45303	56524	54565	41557	45085	42017	42647	41998	45338	53689	44605	69046	70778	67734	71315	49326	47833	46497	46175	49297	50290	47686	49829	67434	65608	43776	47890	49546	39549	48177	46327			56410	51241	44183	46105	62497	70625	53795
417	41739	44880	42307	40940	44565	47615	44878	45479	51549	45510	56191	54339	40835	41460	43949	43536	40091	45009	50189	40344	65678	68925	68121	68641	47158	47491	42508	41799	49179	50610	48197	48842	62025	61948	46179	44442	50975	42236	42819	44466			61926	53370	43464	43072	72030	66479	53406
420	37491	43257	43685	41829	43680	45429	47419	45255	50752	44801	54946	53331	42468	43353	41712	43757	42415	43359	53417	42839	70592	69104	68570	68697	47927	48599	46031	47469	50539	51803	49959	49718	62324	62233	46874	44559	50334	43369	45658	44852			62888	53705	41290	43117	64294	66329	51538
423	38819	42164	41004	40246	45793	44194	45095	43594	51882	46182	55531	53279	43724	42318	43383	42221	41966	44425	52300	41982	68554	68163	68155	68976	48138	45536	39746	46660	51796	50767	47715	48720	67190	63813	47992	45543	49677	43239	48414	45195			57939	51053	46617	45223	62315	66765	55659
426	36093	46419	40487	38714	43353	44354	45186	42827	52157	45907	55962	53322	44499	42843	44322	40680	42241	45881	52973	44858	69568	67100	62979	70207	49496	48821	47214	43866	49458	49483	49306	47763	67546	63036	44921	44667	48190	45315	46467	45392			60311	52769	45174	43003	64229	60406	53562
429	38547	45395	38906	39465	44839	43434	45383	41920	51542	45357	55683	53895	43536	42910	44090	43074	43862	44214	52801	45229	69871	67699	67199	64782	50351	51159	42826	46508	53337	53379	45297	48223	65918	66579	47960	47617	50415	42969	49697	46680			61071	51648	42427	43192	67644	65102	52864
432	36172	44177	42474	38234	45403	42255	45652	42322	52208	46537	55792	54964	45373	44147	43106	42653	43044	45295	55215	44075	71199	67158	65903	71074	51586	50718	45478	44879	53676	52313	47382	48207	68239	63566	45241	46597	49780	42957	47986	46135			60686	53394	46506	42852	58046	61925	52535
435	38709	45962	40862	39318	45684	43892	47966	42071	51141	45772	55425	53381	46212	43791	43526	40989	43941	44261	53462	43278	71108	66169	69486	70580	48447	48496	44709	45905	48134	50143	48854	49438	65910	64215	46636	45786	48816	45176	45787	43833			59301	51343	45316	45896	57931	65023	53977
438	37663	44389	41687	38959	46362	43165	45952	41800	50994	45050	56243	54074	43874	43646	44515	41276	42682	45540	55385	45202	69710	67095	67246	70802	50056	45985	42270	44596	50875	52299	47722	49327	64929	65939	48848	45387	48855	42267	48143	46183			61399	52223	43619	43701	57635	60264	54642
441	37965	43762	38949	41495	46268	44947	47909	43747	52591	45869	56268	54816	45129	42874	43653	40941	41963	45841	52949	42606	70945	67413	69054	72660	49716	49344	45392	46057	51015	50988	47998	49662	64392	63463	49145	46412	53076	45875	48073	44406			60582	52518	49354	46532	63836	62834	53781
444	35572	43294	42372	39580	43969	43551	45425	42829	51503	46335	56133	54069	45432	46954	41957	39961	42486	46095	54391	44488	73112	67802	64787	71529	48032	46078	44385	44203	50100	51056	48386	47804	64628	65132	48940	45377	49030	43903	51059	45205			61338	52542	43413	42490	56832	57402	54301
447	37576	45626	41599	41588	46541	45062	44096	42088	51030	45004	56601	54686	45006	45671	42329	42930	41714	46844	54868	45721	71875	68682	71418	70639	49031	48351	42986	44317	48639	48683	48135	49199	65284	67969	47854	45630	46850	42095	50582	46002			59329	52644	43581	41337	61613	68842	56194
450	38392	44505	40434	39243	46888	43396	44836	41676	52057	46125	56075	54280	42633	42868	42754	42097	41551	44152	55286	43011	71867	68472	64539	72486	49126	47035	46961	45665	50875	53642	48567	49679	66973	65710	49395	47842	47467	45003	51387	47635			61175	52818	43825	42700	65463	58314	53271
453	38875	43962	43259	40541	45091	43911	47063	43413	51664	45582	55431	54182	44013	42724	42043	40527	43591	45232	53612	41024	71447	65673	68876	72313	48903	48084	41828	43767	50511	52804	47714	50145	69543	70526	45935	46575	49872	40789	49380	45185			61621	51988	44275	42135	69507	59743	55022
456	35225	43700	42263	40160	46827	45098	45653	44082	52045	45504	56235	53570	43195	44133	43218	42791	42393	44502	55492	44691	72035	67087	65579	69128	49999	46898	45572	44841	49576	52869	47925	50116	68314	67259	46412	46493	49992	45998	47416	49212			62111	52055	43908	43296	65708	60894	53120
459	38995	44794	39607	39278	45184	44728	46987	42696	51569	45541	56797	54466	43170	42136	43360	40480	41899	45134	56717	41023	71855	68069	70526	72548	48946	49073	40568	44426	49305	52857	48560	48372	65627	69719	50101	45462	49140	44722	48884	44904			63626	51241	46256	46417	64646	59670	54837
462	36794	41510	39272	39977	45064	41677	46374	42908	51474	46374	55640	54230	45534	44482	44601	42811	43455	45243	54158	44321	70138	70097	66632	69182	49761	47085	45641	44581	51958	50702	48710	49840	68437	66654	47888	43356	52433	44793	49054	45612			61155	54584	43762	43639	62549	66469	56386
465	36537	45796	40439	42447	45421	43815	45483	46762	50946	45557	55931	53908	42878	44306	43127	42625	40023	44681	52894	45203	70473	68601	71370	69449	49671	47042	44500	44730	50706	50128	47873	50252	68260	67452	50514	44854	51814	43733	51006	45073			59040	49057	43989	43532	65330	64569	53740
468	37277	44563	40152	39705	45863	42056	47024	43472	52028	45560	55727	54358	45045	42860	41723	42140	42040	43562	56162	44021	69563	68276	65444	68997	50041	45821	46412	46341	49631	51630	47980	48903	66970	65154	48810	45759	52977	45307	48195	49163			58378	50903	43167	43260	63919	65464	56419
471	38469	43938	44404	40976	46165	43758	44533	44092	52692	45948	56378	53845	44556	43008	40003	40940	43068	45068	51381	40063	71216	67938	62973	70699	49071	47666	43178	44636	51609	53549	46891	50092	71279	66461	50531	47069	49833	41235	49439	45576			58241	53963	44077	43399	65057	59793	56624
474	38216	42821	41769	39280	46812	43844	46382	43031	51923	46137	56634	53763	44429	42418	43750	42530	41753	43619	55145	43895	70991	68209	68552	69301	48679	49498	44748	43865	51498	50381	48329	48031	69909	66589	47591	42729	53787	44746	47111	48906			63321	54411	45161	42526	63603	62973	55149
477	37751	44586	40883	40059	44714	45528	47454	38972	51158	45654	55647	54771	44457	44002	43516	42233	42489	44984	53954	42856	69729	66038	68366	67847	49912	49300	42847	44777	52571	52759	47579	48065	68217	69056	50168	46669	51632	42925	52827	49597			62198	54040	44928	45310	66423	58240	55405
480	37424	42214	41646	39131	44274	43350	45799	40550	51148	44873	56549	54301	43764	44907	43361	40949	43640	44890	53474	44898	70220	68024	66498	69618	51880	46809	46405	44650	51801	51025	48761	48204	67558	69023	48525	49653	55420	45971	48098	49192			59663	51627	44917	44345	61437	61621	52178
483	39310	45217	41186	39800	46293	44114	47343	43748	52013	44609	56223	54666	45321	41706	43309	40857	43031	44940	56135	41529	71602	68780	68189	70220	50420	46825	42803	44262	49631	51889	48016	48908	70263	67973	48439	45013	50671	45009	49955	51577			63847	46727	44661	45096	58538	70480	57821
486	36577	42113	39712	40821	42844	41573	46418	42752	52419	45430	56419	55188	45591	45917	42566	41861	43303	44962	54089	43365	72316	68225	66109	70142	48194	46176	46415	44177	50365	50732	49200	49438	68558	69845	49551	46833	58520	47703	47432	49128			57688	49436	44777	42610	57889	65812	55517
489	38892	42982	40103	42765	45468	44811	49558	44284	50894	45838	56623	54430	46579	41969	41077	44167	43355	44894	52668	40894	70123	66145	69500	67999	50120	47239	46671	46343	48062	49785	50376	51003	69547	65284	49956	46177	56879	50212	50117	54022			60002	50731	47094	48045	59252	67425	54637
492	40663	41819	39638	40189	42060	45313	46079	41401	51380	46504	55327	53338	41524	44488	42461	42656	44393	45308	53612	44049	72873	66856	66146	70108	47555	47696	46734	42876	50816	50736	50664	48453	69387	67720	49974	46815	55701	46463	49206	50455			59803	49863	46573	44604	64791	61712	54984
495	36176	45303	38484	41454	45155	42156	46374	44207	51772	46053	57517	53171	43678	42605	43042	40392	43578	43586	52176	42127	71067	68217	69201	70617	48914	48281	42663	46300	48474	49566	50282	48975	69289	69277	49701	44703	55609	47355	49489	52071			58565	50366	44945	45887	63968	64591	54091
498	38584	42717	39830	39255	43070	43574	46669	42993	51225	46630	55174	55229	45717	44532	41095	40734	43962	44782	54152	44369	71737	67210	66500	70887	46866	46892	46475	44724	51252	52311	48852	49314	68525	70874	51026	45887	53059	48339	49454	51059			60174	51118	44759	43837	62829	61083	54814
501	39025	44504	41379	38534	46391	45114	47958	44171	52147	45982	56218	54084	45647	42730	43052	42019	42151	45540	56394	42925	72333	67527	66727	70679	49096	46988	41742	42340	51696	52192	47873	50210	68952	69623	52344	45785	52368	41430	48283	53934			59675	51664	44831	44288	60562	65498	55568
504	38535	41599	40076	39748	44288	43595	47080	43654	52205	46298	56594	54321	45522	43951	42476	41604	43926	44907	55725	41647	70337	67070	67541	72503	48414	47651	44150	44541	50739	51455	46963	49658	69235	71531	49559	44683	57872	49138	50454	52119			59303	51421	46061	44313	62035	58546	56765
507	40705	43150	42415	41667	46370	43692	45541	43863	52703	46506	56732	55641	44050	43836	39718	43800	42428	45297	52177	43171	70756	65911	66191	69193	50725	49690	43339	44365	49765	53655	49674	49164	70527	71618	54842	46535	53648	43893	48716	53520			60654	52906	44701	43568	62895	61871	53068
510	36755	46526	39780	39225	47089	42726	45487	43910	51556	46258	56433	54148	43918	41627	41852	41541	42259	44298	53978	40754	70923	65941	66239	71559	48632	47402	47836	46435	51045	52128	48096	49261	69313	70604	52177	46206	57392	46237	49679	53160			61964	55949	44118	44292	60604	64534	56394
513	38926	44521	39941	40977	46083	44892	46516	44306	51853	45180	55728	53390	43888	43144	43975	43094	42971	46009	55257	41358	72353	69756	70591	66905	51889	50138	41395	46416	50875	54110	48389	47728	71376	71210	52521	47645	56193	45970	50067	56605			62991	50754	46739	44917	62748	64032	55833
516	38387	42929	43093	38528	46345	43168	46572	42977	51981	46850	57031	54521	44959	44302	43144	42326	44420	45906	52802	41084	71676	67949	66396	69352	49966	48016	44775	43329	51374	53896	47379	49546	68886	69660	53647	46400	55565	46716	49117	55763			61864	52147	43779	44648	60158	67969	55365
519	40813	44106	41212	42793	45695	44897	45506	45242	51740	45224	56077	55615	43670	43031	41862	42074	41497	44370	52966	43665	70169	68105	72332	70313	49662	47099	43726	43944	49181	51769	48875	49489	70333	70559	50874	48979	54437	43684	51313	55954			62134	52165	44246	43388	68540	66767	56693
522	39497	44120	41610	41328	46905	43085	46886	44764	51860	46317	56591	54782	42586	43347	40671	42619	40235	44661	53326	42961	71512	70564	69744	70783	49475	46587	42035	44549	49656	55778	47780	48610	69484	68756	50836	43876	54901	47214	51779	56158			60846	50188	45925	43354	69932	67809	56063
525	38246	42532	43701	39722	44927	45134	47238	43932	52340	45733	56475	54100	42730	43098	44482	42873	43144	45529	52385	41638	71973	67075	69350	71653	48509	47397	45367	44911	49790	53702	49425	49041	72942	72121	48302	46518	52362	43269	48713	55829			59951	52480	46216	48977	72328	63360	55060
528	38178	46035	41321	40415	44503	43772	46440	42949	52320	46372	56265	54583	42766	44165	41558	41876	43723	45698	53946	40990	72654	68164	66196	72318	48290	46222	45965	46468	50773	53923	48926	49015	68416	75356	48731	44240	53975	47750	50082	57041			60439	50287	46255	43684	58802	61764	54739
531	37870	43966	41529	39457	45226	43202	46872	42067	52382	46197	56140	54517	44143	42987	43935	43460	42772	44662	50648	44739	72298	67282	66810	72749	49817	47336	44715	46906	50355	50947	49778	50863	70088	70859	53367	44949	53435	42772	48887	56904			58122	48050	44046	44673	69877	63338	56031
534	41621	46023	42111	40048	45557	41745	45449	43601	52586	47032	56244	55244	43612	41816	44798	42584	41812	44171	52549	41763	71378	69650	68871	70954	50071	48372	44798	44928	52884	51447	48614	48919	68543	71639	51736	44708	54279	45436	50079	57601			60538	49641	45134	44901	55401	62484	54962
537	39409	45390	39684	42308	46611	43009	48521	44872	51955	46058	56986	55172	43887	42394	43547	41783	43593	45766	55204	42281	71463	67412	69269	67513	50024	48030	41710	45729	51980	55174	47713	47707	69388	70864	53321	47285	56207	46362	50676	57409			60989	52589	45068	44673	59207	64326	54879
540	35926	46483	41930	39585	46154	42341	45529	44275	52133	46689	57058	55869	44665	43619	43071	42403	43317	46581	54462	42115	71813	68696	67990	72617	49064	47954	44287	44749	53640	51893	49332	48573	70164	71512	51857	46240	56020	44741	50494	59380			58479	50223	44691	43540	56150	63305	54816
543	38337	46788	38786	40238	46151	42097	48629	46709	52110	46509	56247	55283	44271	41545	43911	43688	43534	45945	51035	40418	70503	67607	69778	69839	50559	47850	47951	47655	48499	52594	50546	50903	69688	74574	51138	47230	58720	49072	53466	61548			59213	50946	47326	49170	69272	63666	58421
546	39843	44047	42739	39538	43908	42277	45967	44103	51200	46485	57150	54226	44337	44451	44482	43740	45304	47730	55232	41299	70657	69626	66501	69417	47063	47127	43411	45491	54078	50255	48763	48986	71821	72532	52902	47491	57660	44056	50857	59435			60182	47785	44479	44506	64437	62796	55386
549	36165	45191	39892	41013	46328	42341	48250	45456	52490	46425	56536	54465	46493	44383	44463	43286	43705	44912	56288	41959	71230	65705	68009	67043	50890	48018	42173	46648	53165	53968	47756	47677	73399	71556	53205	45224	56504	46503	53168	59149			60244	51448	43711	43936	77217	64044	57583
552	38761	43314	40324	40117	45956	43860	47090	41947	51770	46106	56636	55179	44973	44407	42363	42108	44325	45741	55029	42214	71794	68217	67152	72022	49998	48714	46564	45308	51668	52460	49073	49787	73438	72765	54176	48203	56659	44726	50031	58532			60895	52056	43463	44387	62744	62041	56313
555	37621	47337	41871	40875	45886	41624	45572	42481	51144	45097	56150	54471	43476	43999	43060	41958	41897	44307	53202	44500	69758	68413	66560	71286	48093	46737	44757	46685	50045	51609	49076	49816	69263	71737	54185	45188	54412	43713	50028	59660			60081	51971	43588	42084	99410	64673	57471
558	40556	46387	41238	38638	46241	43373	47203	43174	51456	45827	55351	54108	44716	43501	42210	43097	42258	45914	54611	41234	71375	67301	66224	69979	49135	47315	46353	44791	48800	51477	49507	49172	72031	75691	53428	44927	53445	43451	51822	61373			58899	51241	45300	45244	84082	61322	56441
561	39836	44920	44461	40959	46544	42437	46741	45183	51673	46496	57026	54611	42843	46184	42317	41261	42799	45907	55949	41343	72386	68923	72367	68691	48759	49280	42203	43730	52122	51690	49967	49385	70848	71709	50455	46994	49932	41574	50988	60585			57581	52483	45209	42140	96919	63174	56627
564	40332	46072	42543	39993	48179	42181	45872	43679	53168	46678	56365	54898	43551	42044	43905	42654	42202	44551	54870	43137	69095	68559	67793	71093	49097	48496	46037	45904	51123	54382	49381	49018	74791	73902	52891	47167	56519	42739	52112	62610			60125	52089	46602	44145	89592	65247	55847
567	39496	45047	43719	40798	46706	43795	46912	44695	53005	47628	56676	54930	43285	43831	43012	42551	42063	46762	54728	43097	69969	66151	72249	67623	49975	48636	43279	45326	52043	55897	48407	48683	73737	75558	53723	42496	50957	42290	52101	61327			60969	52763	43071	42456	92551	63960	57436
570	37632	43263	42985	39876	46156	43290	45842	42767	51901	46196	55957	53710	46228	41738	41793	42312	44107	45074	54126	42646	72288	69319	68220	70330	49319	48496	43778	44424	53021	53647	49993	49378	72890	75944	53141	46992	52900	43490	52009	61983			57477	51035	44453	44898	88648	64660	55849
573	38278	45502	39890	39772	48362	43894	49234	44042	51657	45913	55945	54595	45448	41365	42596	41925	43113	46016	53729	43097	70944	66395	70172	72102	47795	48526	40740	43887	52751	54945	50627	49948	73727	77046	53382	45337	51703	42103	52943	62520			59645	52809	45011	46718	81063	70145	55000
576	39703	42569	41693	39102	44635	43882	45241	43426	52948	46402	57507	53396	44997	43592	42074	41776	43469	45944	54829	41862	71164	66082	67447	73345	48388	47923	45702	44399	51464	51946	49473	49248	75084	73854	54524	46689	57020	43718	52503	62637			63066	52209	45534	43806	94632	60922	59288
579	40412	44730	40079	41193	46077	44536	45710	45150	52444	46602	55831	54656	43312	43037	41277	38410	43364	46345	51952	43253	71885	67624	64869	66752	49422	49489	44216	45216	50071	52351	49121	48410	75841	76689	54289	49625	56756	45585	53429	63878			62389	51516	44798	45218	83262	63657	57810
582	36363	45734	42289	39208	46860	44008	46109	44571	52647	46631	56114	53799	42499	41943	41680	43083	42863	43621	54652	43400	71585	69988	66641	71067	48076	47117	43272	45033	51674	52084	50203	49037	73465	77635	56856	46009	55180	43269	53579	63564			62472	53209	46413	45682	60724	60584	55803
585	39466	43680	40552	39115	47671	45000	46996	43793	52293	46354	55760	54016	45791	45658	41302	41793	41787	46418	54303	42849	70331	67010	69725	70603	49585	49179	42092	41642	51017	54544	49908	48914	74365	74710	51838	44910	52088	42308	54182	64975			60014	51932	46871	47231	64314	65962	56655
588	37562	41039	42011	39103	43432	44113	46414	43916	51272	45818	56682	53692	44005	46454	41287	43569	42279	44906	55108	41372	72463	69985	66612	70834	48386	47625	44335	44528	53816	53926	49773	48662	73536	78188	54960	46697	53176	43502	53356	63449			62349	51490	44561	44750	59026	60742	57420
591	39372	44925	40581	39191	45168	44374	45696	44433	52662	45962	56921	54249	44339	44926	43733	42622	42771	45154	53590	42023	72052	68741	64027	68658	50077	51114	41185	45348	50339	54383	49575	50007	74343	78107	54337	46049	54902	42912	53080	64628			63161	52162	45848	44213	59546	59995	56515
594	38732	47732	41426	39137	46350	42961	45828	45144	52361	46002	56423	54548	43693	45435	42131	41927	43157	46815	55510	43794	71424	67836	68446	69824	48413	50782	44169	44443	51294	53057	48903	49277	73538	76533	52719	49417	53338	43577	54783	63809			63198	52540	44642	46170	66033	60152	57661
597	38129	43206	42496	40256	47057	42844	45786	47711	52481	46252	56048	53904	43272	43714	42495	43362	43106	45480	54792	42622	70421	68575	72639	69471	49825	49284	43719	44969	51930	53396	49198	49624	74692	78402	55470	45994	56321	43541	55562	65705			60634	51200	46935	44834	61297	60919	57534
600	38963	44216	40366	38902	47513	41616	46270	44855	51878	46673	56598	54654	44313	42173	41517	41973	40364	43391	53967	41688	72797	68970	66729	70114	50283	48305	43975	45651	50073	54858	49308	50136	76788	77472	54492	44688	55084	45022	54660	64466			60210	54663	45033	44871	59888	61557	56689
603	38879	43158	40180	40687	46054	45075	48316	42119	52959	46435	56693	55100	44012	46657	45829	43522	43146	46004	54808	42588	71228	67467	69820	70314	49952	51093	46637	45111	53786	54632	48547	49785	75430	79708	53993	46797	56422	44516	54081	65142			58746	51665	45155	45167	74716	57409	58285
606	38859	42671	40544	38412	45290	43393	45825	42972	52088	46232	57430	54855	44971	45173	42950	42146	43008	45235	54562	43311	70976	67066	67931	68214	51397	48881	43659	44685	55817	52550	48334	48422	75346	78697	52566	43806	56559	43669	54296	64320			57892	51757	46389	44842	60746	58708	56804
609	36468	45275	42346	41872	44939	42043	45391	45559	51700	46258	56690	53367	43069	44363	42246	42472	42581	44759	52435	44247	73592	67805	70946	70635	49781	50886	43185	45201	51370	53814	49922	49753	73403	78145	55416	43148	51808	42960	55174	66193			59241	52777	46318	43889	62129	61877	58944
612	38622	46302	42275	39611	46070	41735	47888	43783	52054	45831	56844	54369	43605	42520	41834	41544	44284	44985	53804	39563	72201	67857	64266	70072	50986	50441	43286	46105	50085	54561	48819	48922	74269	78325	52738	47380	56273	42906	54355	65352			60838	52716	46144	45042	62406	63055	57048
615	40243	44127	42809	41080	47014	42993	46804	41925	52094	46341	56714	54622	42856	45405	43045	42658	43018	46391	51898	43389	71512	66796	67337	68280	48562	47888	44540	45483	51927	53225	49696	49661	77491	76649	53607	46224	53356	43428	54641	65956			63039	54930	45972	47184	73582	63456	57581
618	38774	41576	42177	38982	42882	43369	46360	43005	52211	46863	56343	54397	44465	44941	43158	41465	43294	44979	53300	40264	73913	67477	65157	70549	49783	46876	46429	46787	50998	53019	50106	49507	73934	76075	54091	46508	54430	44407	55259	66241			60670	51209	44855	45197	75363	58837	55490
621	40810	43638	41355	40641	49163	43447	46003	44125	52316	47287	56486	54138	45879	43037	42401	42296	41379	46868	53236	38521	70733	66215	68421	67802	51537	50611	42684	43706	52310	52268	47288	49840	73513	74203	52407	45012	55424	44132	53184	65923			60880	55355	45362	44000	87456	58502	57512
624	41639	44926	42311	40433	46129	42041	45534	44654	52352	46233	57007	54279	45139	44251	42605	41095	42292	46865	54973	41536	71081	69040	66558	71603	51423	50536	44574	44208	52188	51823	48983	48572	71483	76807	52356	44348	55521	45300	54033	67658			63672	50479	44525	44882	65739	55410	57744
627	36330	45017	43773	41808	45653	41929	46907	43630	52301	46550	57253	54921	44426	43254	42840	40703	43735	45104	53202	39090	72457	67795	66201	66207	51630	48847	42149	43999	53872	55618	48206	47716	74967	77851	55227	44944	52984	43196	54214	67327			61196	55149	45119	43144	60637	59252	58645
630	38771	42424	43075	40395	46496	42460	45589	43628	52221	46752	56297	55098	45156	45100	42225	42562	42106	45383	55328	41275	71181	67076	65834	68734	50311	49741	44350	45425	52664	54089	47763	48723	75164	76653	53322	43220	54193	43740	55063	66297			64187	50827	45039	44975	63908	53765	55890
633	36256	44371	42372	39219	45334	42380	47102	42565	52031	47025	56300	54306	45826	43790	40785	42813	42453	44281	51663	40035	72221	69659	68728	68457	47475	49010	47093	45225	54564	53920	49933	49268	76197	79473	53020	43900	54342	42826	55690	67407			61736	52137	46553	50269	71862	60781	55770
636	38661	41910	41124	40743	43862	43936	46279	42603	52121	46602	56660	55009	45082	43733	40446	42583	45079	46408	54337	41229	73030	69759	64845	69458	47922	47433	44681	45686	51908	50368	49183	49554	74914	76355	55003	45227	58564	44289	54310	68227			61436	51150	46880	44759	107568	59750	59194
639	39004	43026	42652	42123	45305	43070	46157	47037	52080	46373	56687	55869	42298	43339	41317	42363	41378	44873	51911	41442	71541	67823	70317	70096	47420	48727	44908	44260	51335	52863	51140	48745	74167	80062	56426	45162	54577	43723	55753	67446			60406	51148	46418	46089	59245	58920	56669
642	38462	43988	40926	38358	49125	43228	46065	44128	52317	46925	57238	54635	42889	43623	42920	41716	43768	45058	54955	41030	72208	68233	66007	71613	48739	48239	43503	45958	49916	52744	48686	49014	76884	79952	55432	44706	55220	45238	54795	67329			61500	51758	44894	45629	63004	59707	56077
645	40351	42095	39065	39771	46117	43551	49019	44958	53196	45825	56532	54409	42524	44658	41383	42011	43163	46129	52479	43038	70662	67412	69034	69740	47128	47888	44849	48213	52990	53297	50481	49910	75639	77510	50739	43911	59599	44434	55323	68181			58725	51183	46888	51183	61013	59947	56442
648	41895	41771	42051	39210	43061	44035	45577	42194	52895	46772	57388	54707	44154	45269	41988	44083	44433	47465	55173	42799	72998	66001	70267	67183	49570	48779	42787	44687	52877	53414	49626	50044	77446	78924	53859	42462	55469	44555	54502	66880			60803	51543	45631	44666	65610	56965	57574
651	36116	43960	44481	42092	45618	42970	47402	42773	51954	47890	56962	53781	46217	44129	41761	41406	42968	46196	50986	40369	71024	68344	62722	68192	52842	51402	43884	45537	51707	54969	49203	47939	77679	80184	55918	45332	54635	43849	55049	66487			63087	52135	44953	42343	59716	59597	58186
654	38733	41872	42507	41794	48690	43278	46693	44628	52404	46329	57706	56015	43359	42952	40720	43330	43067	46075	53824	42703	70712	65268	67250	68602	49545	51950	43489	44135	51566	52219	49853	48628	76834	74446	55328	44612	55187	45518	55917	67194			62462	49826	45431	44431	58928	58844	57979
657	40664	42429	43678	40631	47045	43645	47026	42660	52847	47226	56882	55622	43826	44169	44170	43931	41734	47423	53725	43209	71643	68876	68202	68889	47916	50059	44739	44274	51679	53968	50063	50134	76062	81347	52367	46262	55645	43693	56063	67668			60022	52691	45929	47800	61642	56087	56577
660	38832	41029	41952	40446	45477	42468	45508	45058	52095	46112	56983	55284	43186	44212	44060	43889	43172	46466	55247	42142	72287	67256	67359	66758	49618	48505	43145	44762	53013	52504	49015	49622	76725	80439	53951	45304	56248	45154	55684	67708			58525	52335	45773	45289	59635	57556	58507
663	38821	41796	40142	40552	46839	43533	48176	40332	52447	46543	56445	55118	43039	42470	44413	41671	42408	46191	54637	41844	70454	69524	67685	70207	51042	50658	44603	45254	52462	54050	50362	48855	75970	78355	53888	46296	56723	44707	55508	67580			61406	49108	44511	45460	61747	59442	57957
666	39421	42083	43362	41189	42827	41906	45489	45306	51849	47834	57940	54961	43320	42775	42427	42481	43619	44619	54048	41639	72751	70288	69370	65442	50655	49994	44046	45179	54048	54677	49527	48842	77323	81547	53598	45490	55509	45309	56467	68811			63013	50873	45300	43575	64870	61624	56154
669	38587	47317	44678	41011	45604	42666	46385	46042	51829	46501	57156	54822	45499	44357	42909	41970	42830	44799	55381	41630	72964	70877	64466	72962	50251	52867	42247	44998	52339	53815	49001	48482	76949	80748	56569	45209	55295	44206	55447	67471			62147	51669	47090	44186	62406	57429	57287
672	41023	45367	42224	40959	47849	43465	46159	46359	52855	46332	56238	54639	43894	44658	43218	43021	43050	45851	55430	43930	72470	69700	66007	68629	49273	49545	43925	44910	51161	55525	49316	48171	75354	80054	57242	44984	55950	45278	56568	67782			64954	51239	45337	45645	65187	51348	57780
675	41464	46615	42838	41282	46540	42164	46418	42461	52040	46992	55993	53849	43617	42493	44065	42885	44066	45869	51368	42048	72301	69017	71770	71012	49560	50074	43672	44656	51433	53309	49164	49986	76808	82344	55083	44515	56876	44273	55318	67218			63060	52829	45982	47018	64016	56428	58307
678	41532	44325	43801	41872	46484	42196	45264	44611	52788	46802	58367	54285	44069	43064	40649	41111	42562	45852	54531	40896	72118	66611	66392	67325	49066	48614	44818	45155	51978	53445	49878	49495	77402	79310	54325	45154	58675	44964	55121	66941			60588	50828	45484	45512	58443	54418	57824
681	39811	46374	43265	41068	47203	42920	47035	42742	52099	46113	57934	55348	43859	41516	43902	40661	42333	45207	52496	42708	73736	65326	70021	68081	49494	52120	44072	46472	53758	53702	50639	49677	77088	81572	53513	45953	57217	44410	57893	66392			60694	49929	46551	45456	73308	55522	57369
684	40463	43027	43557	40564	44997	42492	45392	44317	53599	46937	58750	55322	43632	44184	42659	41628	44691	46895	51537	42000	72829	65845	67636	67731	50434	49367	45279	44861	52703	53206	49190	48660	77436	80181	53959	43933	55332	45077	56466	67632			61442	51861	45205	46649	65035	55912	57674
687	39558	46641	41842	40741	45549	41691	45062	47254	52611	46972	58795	54551	44632	42500	42691	42847	42729	45359	55090	43914	72330	69087	68654	63549	49879	48117	43299	45532	53052	50955	49214	50587	76468	79604	56792	46527	55848	45166	56331	67984			59778	51010	45871	44568	59710	49975	57951
690	38779	43720	43259	40679	44870	43680	46411	45676	52599	46549	56346	54933	44077	45098	45071	42376	41669	47554	55072	40607	72622	70355	67453	67329	48460	47885	44646	46552	50027	51256	48702	49225	76887	80034	56519	43133	55558	44940	55639	67939			61827	51951	45581	45202	60673	57323	58465
693	38706	44231	40912	41702	47400	42721	47936	45699	52242	46421	57596	54615	43812	43876	44987	43269	43781	45552	55619	42002	72823	67625	67661	69102	50957	52358	42874	46496	52905	54464	47415	47790	77675	78313	55519	45713	57738	46774	57081	68351			59316	50902	43591	45432	61530	56924	57738
696	39314	43793	43590	40440	44731	41604	47416	44568	52194	46310	57262	55057	42981	45918	41816	43261	43761	47170	54155	41292	73100	69437	67601	67381	51460	49331	46073	45211	54851	51486	47785	48497	76228	81869	56589	44433	56089	45094	56114	68564			58809	50926	44938	46013	60004	56890	58084
699	38686	47365	40973	41449	44853	42776	46988	44367	53402	46355	56262	54916	42615	43680	43065	43180	40799	45869	55934	41334	71675	70119	63015	66037	50864	52045	41873	44365	52417	55528	47080	48428	77967	82786	55732	44520	55200	44518	55676	66720			61399	50555	44836	43896	60543	59248	57683
702	39160	45538	42554	41410	46411	42122	46149	44734	52858	45839	56526	54237	45189	43952	43065	42121	43764	47201	53441	42084	73388	69252	66953	67330	48016	49864	44074	45132	52625	53173	49340	49686	80349	80471	57217	43896	56507	46445	56045	68548			58441	49673	44787	47127	61684	54941	57117
705	40923	42979	39426	42610	44778	42484	46947	46916	52588	46497	56475	55951	43698	44339	41288	42381	42037	46271	52292	39773	72310	68777	68916	70977	49392	50438	45439	45599	52225	53051	49401	48604	77147	81688	57736	44279	57345	46491	56969	67808			61754	49773	45555	45349	62445	57420	58070
708	39508	43416	42586	40870	47816	41983	46857	44966	52963	46781	56719	55086	44942	44433	42923	44067	40473	46063	54472	43203	72281	67609	68619	68575	50439	48557	43509	44272	49985	52233	49758	49035	77120	82825	52959	47054	56994	45628	56687	67899			63808	52894	46763	45858	61428	49070	58598
711	39966	42525	38263	39347	45593	42893	48020	44013	52417	46312	57771	54390	44939	45054	41551	40312	43871	44928	53215	42508	71857	67411	72490	69801	49473	48675	42214	45780	53717	53877	50279	50402	77600	82646	53034	43536	57226	45234	56082	67598			62636	50949	45977	49903	64077	52008	58665
714	37186	42791	42232	40785	44760	43160	46103	42469	53611	46249	56166	55286	45327	46096	41981	42949	42975	46112	55666	41964	71934	67655	67694	68704	47897	47793	44207	46222	52918	52794	49656	50050	79173	82524	55202	44684	56326	45421	57743	68911			62210	50716	46543	46286	79476	54091	57773
717	42289	44213	40361	39894	46195	43124	47421	40251	52971	47006	56123	55019	42598	43360	44220	42110	43038	46141	53598	42046	72624	67774	63242	67706	51627	52217	43827	45725	52644	54889	48554	49737	77524	83249	53336	47322	58692	45419	57960	69387			62784	49873	46513	47394	85238	57521	58574
720	41119	42886	41360	40596	46110	42665	46195	45213	51189	46658	56880	54516	44550	44175	43369	43284	44626	46531	56171	41234	71251	68727	65851	67178	50883	49765	42355	44778	52709	53199	50652	48592	78107	79704	53482	44845	56500	45600	56239	68753			60590	53277	46482	45386	61961	55982	58279
723	39526	45260	42855	42264	47260	43384	46378	46999	52803	46773	57629	55827	44645	42011	42433	41044	42321	46470	54447	45081	71876	67792	74199	70145	50472	50382	44707	46953	51181	54234	50559	49865	77735	79901	53632	44059	55368	44935	57054	68258			57965	50623	47850	43559	62900	55039	57932
726	39745	44337	42436	39740	47381	42470	46856	44777	52663	47751	56810	55187	44019	44854	43695	43707	42505	44740	56039	42071	74245	68108	69436	67122	51092	49553	42308	45582	53191	52587	49237	49622	79290	83079	56887	44929	56841	46759	57013	67654			63662	50118	45937	46151	62065	50534	58549
[truncated: 33 more columns]

## Sheet: Figure 4
Time	A2.0	A2.0	A2.0	A2.0	A1.5	A1.5	A1.5	A1.5	A1.25	A1.25	A1.25	A1.25	A1.0	A1.0	A1.0	A1.0	A0.75	A0.75	A0.75	A0.75	B2.0	B2.0	B2.0	B2.0	B1.5	B1.5	B1.5	B1.5	B1.25	B1.25	B1.25	B1.25	B1.0	B1.0	B1.0	B1.0	B0.75	B0.75	B0.75	B0.75	C2.0	C2.0	C2.0	C2.0	C1.5	C1.5	C1.5	C1.5	C1.25
0	20099	21149	20952	20873	21915	21198	20454	19992	20715	21022	19877	20238	20422	20548	21859	22899	20813	21005	19909	19559	23762	24705	22821	23448	22197	21975	22234	21814	25470	25935	24300	27493	26871	26869	26095	25775	20669	20667	19728	19184	3672	3929	3699	4017	3688	3693	3786	5277	3721
3	17318	18791	18261	19162	19160	18660	18418	18690	19060	17964	18756	18159	18984	17941	20383	21421	18107	18014	18700	17619	17363	18108	17409	17873	17760	17812	17531	17485	18225	17820	18031	17644	17963	18105	17909	17766	17209	17057	15754	16210	3680	3853	3924	3863	3870	3904	3793	4985	3593
6	15426	16179	17005	17101	17564	17121	17303	16679	16481	16644	16338	17140	17188	16959	18086	21143	16225	16387	17234	16226	15139	16490	15346	15664	16023	16256	15456	15874	16367	15960	15446	15394	16568	15551	15863	15265	15322	15168	14683	14383	3770	3582	3623	3466	3686	3859	3436	4667	3677
9	14297	15201	15362	16644	16348	16220	15697	15698	15632	15255	15422	15994	15254	15892	17204	19779	15317	15143	15791	15377	14210	14992	14204	13873	14862	14882	14346	14410	14902	14551	14390	14023	14702	14190	14577	14068	14393	13400	13413	13048	3828	3666	3652	3799	3711	3813	3791	4032	3914
12	13629	14683	14663	15583	15310	14978	15634	14779	15398	14747	14911	14991	14938	14597	16187	18892	15110	14270	14923	14265	13324	13827	12974	13177	13696	13957	13233	13624	13692	13299	13546	12798	14024	13867	13688	13458	12942	12471	12745	12260	3969	3854	3834	3882	3717	3667	3829	4200	4002
15	13882	14115	14517	13815	14874	14364	14749	14606	14239	14449	14074	13713	14475	13763	14624	18538	14232	13734	13901	13829	12634	13093	12475	12803	13262	12703	12492	12693	12850	12607	12940	12528	13383	13097	12410	12789	12209	12314	11978	11661	4645	4186	4823	4336	3607	3635	3989	4866	3642
18	12842	13543	13859	14313	14309	14452	13880	13730	14021	13568	13140	13753	13881	13811	14059	17566	14018	13768	13539	13382	12181	12985	12574	12178	12423	12373	12042	12312	12178	11825	12455	11763	12863	12162	12214	11896	12620	11898	11249	11395	6039	4714	5562	5167	3863	3761	4803	5458	4022
21	13498	13031	14371	13824	14227	13842	13346	13544	13457	13476	12907	13073	13622	13643	14233	16782	13315	13585	12885	13366	11942	12023	11996	12056	11986	11854	11518	12234	12058	12008	12185	11555	12150	12364	11497	11806	11519	11799	11170	10964	7699	6118	7629	6740	4433	4414	5411	5669	3876
24	13561	13164	14656	13714	13890	13798	13240	12968	13373	12931	12703	13247	12850	13174	13987	16844	13124	13273	13360	12754	12472	12161	11879	11308	11651	11686	11748	11863	12120	11647	11557	11490	11827	11702	11506	10863	11334	10973	11053	10871	10090	8526	10582	9484	5410	5500	6676	6373	4699
27	14689	13783	15651	13744	13991	13562	13340	12989	13045	13045	12480	12602	12827	13104	13728	16504	13250	13436	12929	12665	11507	11852	11738	11493	11711	11199	11604	11421	11250	11186	10979	10670	11548	11391	11540	11234	11022	11439	10619	11002	12219	11461	13364	12464	7079	6494	8028	7996	4951
30	15551	14111	15472	14858	14152	13707	13503	13099	13269	13128	12440	12575	13489	13336	12634	16155	13125	12301	12019	12559	11644	11527	11457	11336	11255	11272	10870	11340	11255	10882	11151	10950	11168	10809	11193	10636	11247	10875	10562	10733	15351	13062	15627	15900	9316	8089	9735	9881	5646
33	15164	14470	16458	14974	14274	13801	13809	12962	13044	12880	12819	11946	13174	12393	12945	15416	12675	12877	12535	12108	11443	11502	11678	11110	11224	11243	11092	11068	11021	10879	11274	10829	11882	10898	10782	11102	11179	10798	10304	10173	16483	15774	17881	16755	10727	10042	11430	11279	6376
36	16795	15473	17703	15606	14254	15014	13805	12626	12695	12463	12230	12498	12304	12789	13102	16017	12861	12695	12281	12048	11316	11163	10883	10716	10752	11351	10695	11342	11124	10587	11163	10667	11458	10611	10775	10616	10619	10464	9967	10563	17346	16587	18331	17978	12385	11339	12278	11945	7459
39	17226	16023	17960	15766	15506	15555	14077	13587	12821	13243	12582	12580	12875	12569	12579	15189	12481	12187	12369	12591	11242	11573	10950	10960	10929	11036	10710	10815	11014	10794	10981	10281	10963	10928	10517	10778	10698	10626	10073	10471	18164	17417	18857	18430	13066	12450	13027	12894	8384
42	17561	17003	17909	16072	16006	15619	14610	13838	12575	13324	13096	12209	12516	11969	12927	15014	12591	11992	11996	12202	11324	11322	10976	10708	10837	10459	10366	10732	10633	10676	10825	10314	10582	10945	10527	10625	10627	10615	9830	9967	18313	18243	19850	18190	13175	12718	13803	14386	8842
45	18856	17139	18607	16744	16305	15980	14773	13940	13097	13183	13099	12344	12745	12069	12681	15086	12270	12633	12303	11921	11560	11063	10741	11005	10439	10456	10060	10824	10787	10628	10519	10305	10976	10619	10496	11052	10832	10761	9692	9874	18781	17748	19643	19012	13560	12535	13613	15122	10354
48	18998	17574	19269	17543	16610	16171	15103	14509	13532	13862	12871	12923	12297	11979	12771	15298	12093	12301	11968	11942	11496	11281	11097	10582	10478	10717	10283	10682	10380	10444	10688	10126	10801	10605	10732	10685	10782	10396	9706	9753	18508	18251	19165	18593	14073	14020	13612	15059	10846
51	19714	18409	19252	18161	16827	17485	15457	14435	14068	14094	13256	12597	12427	12411	12641	15295	12228	12043	12321	11882	11079	10889	10968	10710	10838	10848	10239	10763	10725	10425	10804	10222	10459	10584	10653	10332	10509	10121	10052	10329	18906	18226	18983	18897	14240	13598	13963	15621	10773
54	20433	18898	20138	18645	17081	16426	15622	14831	14202	14489	13690	13643	12119	11994	12321	15887	12404	12019	11762	11931	11138	10867	10431	11040	10551	10766	10384	10462	10545	10768	10842	10195	10467	10380	10446	10562	10599	10358	10165	10096	19789	17845	19250	19162	14119	13664	14144	14629	11177
57	20766	19209	20384	19399	17038	17362	16176	15621	15362	14843	13488	13473	12514	12129	12426	15592	12860	11910	12023	11888	10692	10630	11033	10605	10660	10571	10621	10532	10318	10221	10977	10751	10648	10890	10158	10244	10257	10357	10037	10062	19347	18700	19649	19831	14915	13493	13985	14267	11414
60	20120	18848	21217	19228	17136	17906	16427	15342	15223	15572	14299	13619	12730	12796	12400	15187	11916	11747	12020	11749	10885	11132	11292	11028	10865	10784	10308	10918	10552	10323	10773	10619	10395	10544	10290	10385	10291	10052	10022	10429	19954	18568	21089	19014	14894	14179	14392	14773	11956
63	21176	20015	21591	19833	18158	18886	16709	15710	15566	15234	13523	13934	12766	12222	12699	14410	11583	12129	11750	11782	10788	10722	12506	10426	10870	10723	10508	10230	10760	9631	10703	9826	10696	10433	10279	9990	10804	10008	9496	10404	20111	18506	19236	18805	15080	14292	13894	14805	11690
66	21493	19800	22012	19471	18052	18296	16482	16407	15618	15672	14560	13895	13295	13115	12819	15843	11896	11801	11675	12443	10765	10860	13664	11775	10456	10436	10396	10177	9984	10405	10367	10316	10830	10246	10171	10104	10496	10190	9785	10015	19394	18886	19384	19451	15372	14767	14300	14955	12354
69	21332	20400	22521	20330	19069	18971	17041	16337	16175	15684	14550	14566	13303	12862	12758	15670	12145	11895	11974	11966	10800	11092	14485	12908	10271	10738	10439	10498	10394	10304	10930	10066	10999	9922	10003	10534	10366	10250	9729	9995	19185	18927	18894	19076	15380	15044	14794	14692	12368
72	23121	20590	20915	20184	18689	19450	17703	16311	16239	15573	14927	14626	13190	13340	12794	15109	12022	12080	12054	11598	10768	12687	14933	13820	10454	10671	10464	10909	10631	10326	10266	10137	10876	10050	10515	10618	10363	10242	10051	9811	20263	19336	19429	19055	16274	14583	14031	15541	11593
75	23437	21180	22282	20353	19339	19628	17584	17293	16437	16805	15490	15174	13320	13779	13773	16160	12192	12235	11198	11907	11219	12903	16905	14413	10588	10566	10739	10932	10472	10349	10617	9994	10606	10355	10422	10401	10047	10270	9933	10084	20369	19398	19399	19310	15730	14771	14271	14617	11949
78	22365	21433	22709	21060	18579	19565	17729	17008	16418	16891	15352	14925	13693	14131	13648	15763	12093	11850	12223	11513	12304	13733	17140	14761	10890	10445	11490	12032	10465	9885	10212	10112	10850	10212	10235	10499	10459	10075	10038	9724	19916	19223	19544	19400	15796	14330	14031	15791	11843
81	22509	21794	23865	21436	19797	20295	18262	17818	16564	16769	15818	15560	14024	14112	13918	15854	11969	12111	11829	11982	13300	14806	18729	15050	10771	10511	11760	12467	10304	10002	10615	9834	10780	10683	10214	10225	10113	10372	9607	10177	20282	19274	19898	20917	15849	14522	14310	15714	11892
84	23136	22369	24577	22085	19614	21751	18428	17570	17129	16794	15570	14786	13982	13999	14294	15567	11934	12460	12193	11942	13053	16033	19185	15960	10330	10651	12017	12779	10357	10492	10379	10447	10606	10303	10486	10091	10392	9662	10156	9840	19964	20597	18913	19723	15322	14360	14739	15497	12345
87	23136	22800	23965	21573	20062	20917	18398	17726	17823	17231	15844	15851	14551	15006	14170	16176	12096	12569	12656	12037	14875	17132	19998	16809	10646	10397	12330	13133	10689	10431	10100	9862	10941	10686	10479	10621	9646	9929	9785	10135	20612	19422	19388	19745	16133	14792	14797	16385	12458
90	24938	22092	24725	22998	20516	21302	19067	18041	17974	17579	16041	15852	14230	14942	14645	16740	11590	12025	12712	12073	15142	17771	21693	17690	10497	10369	13091	14052	10434	9951	10474	10493	10761	10548	10137	10130	10130	9788	9369	10279	20574	19825	19326	19720	15239	15000	14911	16145	11835
93	23555	22902	24241	23611	20837	22098	19388	19204	17944	17638	16430	16829	14356	14852	14671	17014	12156	12082	12923	12077	16609	18775	23461	18201	11111	10932	13394	14314	10543	10463	10065	10642	10932	10371	10109	10565	10277	10588	9499	10250	20905	20117	19544	20036	15868	14745	15234	15277	12640
96	24702	23068	25079	23832	20590	22870	19595	18464	18208	18137	16352	16776	14982	14749	14727	16954	12272	12166	12632	12490	17297	19700	25793	19478	11633	11529	14040	14667	10157	10498	10110	10497	10767	10752	10701	10536	10187	10563	9667	10254	20757	19998	20456	20174	15833	14575	14924	15909	12258
99	24970	22662	26255	24823	20863	23014	20101	18635	18131	17695	16867	16432	15006	15647	15191	17905	12641	12514	13076	12487	18867	21617	26728	20028	12647	12446	15363	15116	10447	10366	10502	10610	10439	10555	10664	10435	9956	10227	10264	10097	20603	20102	20176	20589	15583	14184	14769	15400	12836
102	25530	24318	26651	26202	21768	22888	20828	19475	19175	18423	16882	16956	15877	15461	15490	17488	12900	12463	13332	12637	19691	22368	29286	21968	13069	13339	16356	16080	10614	10416	10712	10371	10686	10161	10429	10373	10576	10172	10033	9840	20900	20079	19392	20348	15971	14629	14457	14940	12721
105	26038	24000	27309	25588	21626	24017	21083	19254	19119	18271	17552	17488	15806	15705	15580	17976	13029	12592	13165	13132	22071	25241	30175	22838	14072	13919	16321	16540	10893	10646	10430	10767	10873	10749	10648	10654	10678	10582	9959	10017	20497	19459	20471	20570	16464	14781	15240	15763	11966
108	26442	24720	27673	26054	22692	23245	21292	20201	19434	19182	17261	18025	15482	16226	15930	18420	13704	12358	13823	13343	22548	25163	32776	23791	14886	14350	16591	16554	11103	10337	11033	10716	10739	10769	10719	10852	10447	10301	10111	10045	21207	20226	20783	20737	16398	15342	14521	16372	12591
111	26299	24952	27999	26270	23269	24107	21709	20389	20321	19322	17687	18211	16043	15985	15975	17805	13366	12705	14384	13631	24701	27403	34993	24300	15304	14880	17059	17371	10469	10707	10924	11417	11571	10533	10569	10305	10161	10344	10025	10112	21400	19626	20992	20646	15704	14465	14131	15676	12704
114	27201	26208	28147	26586	23113	24678	21191	20971	20158	19916	17635	18500	16482	16753	16993	17921	14039	12677	13996	13301	26744	28879	36845	26580	16212	15175	17592	17700	10535	10215	10752	11546	10895	10719	10900	11042	10318	10495	10178	10310	20963	19867	20421	20826	16701	15325	14658	15659	12773
117	28196	26480	27812	26882	23136	25481	21260	20640	20822	19865	18568	17605	16191	16777	16034	18078	13577	12720	14079	13689	26936	31334	38080	28066	17017	16012	17029	18762	10694	10445	10568	11762	11308	10784	10149	10566	10504	10502	10090	10007	21245	20487	20573	19928	15071	14838	14911	15722	13156
120	28821	26640	28744	27384	23258	24976	22152	21409	20915	20026	18206	18117	16189	16820	15969	17902	14394	12837	14272	13438	30926	32247	38799	30094	17429	15930	17621	19016	10559	10637	11170	12688	10807	10553	10718	10860	10468	10569	10000	9879	21576	20076	20799	20534	15808	14832	14961	15790	13495
123	28864	26855	27976	27327	23456	24246	21980	21143	21458	20036	18063	18444	16975	17068	16516	18338	13969	13032	14030	13495	31637	35175	39039	30563	18589	16804	18728	19349	10806	10521	10757	12724	10920	10693	10644	10623	10693	10460	10086	10316	21983	20538	20443	21217	16415	14730	14103	15715	12828
126	28230	26601	28194	28185	23523	25408	23054	21273	20482	19910	18790	18520	16071	16720	16623	18343	14278	12972	14418	13537	34703	36495	38720	30961	18410	17330	18831	21434	11194	10848	10968	12871	10617	10558	10628	10954	10661	10624	9982	10124	20879	20601	20897	20414	16089	15761	15024	15888	12998
129	28901	26570	28531	27919	23463	25100	22947	20650	20486	20344	18585	18460	16747	16762	16188	18227	14519	13502	14281	13807	34904	37440	38731	33281	19526	17271	18790	21806	11427	10308	11518	13221	11105	10548	10639	10555	10224	10623	9838	10545	21035	20229	19752	20937	15641	15336	14927	15122	12582
132	29101	27084	28835	27490	24297	25566	21354	20665	20865	20445	18319	18228	17233	17065	16555	18276	14302	13552	13962	13725	39777	39183	39184	32883	19597	17809	18910	23096	11773	10779	12066	13489	11164	10641	10502	10827	10377	10571	10131	9924	20707	20174	20986	21281	16547	14928	14884	15812	13006
135	29313	27049	27899	27140	23891	25354	22336	20763	21005	20067	17936	18830	16773	17564	17889	19368	13964	13584	14742	13732	38333	40347	39825	33987	20036	18925	19084	23680	12663	10545	12484	13563	10529	10825	10256	11048	10231	10461	10054	10418	21182	20308	20584	20757	16277	15022	14537	15423	12772
138	28192	27214	28351	26933	24044	25421	22702	21100	21105	20100	18527	18408	16555	17656	17627	18672	14589	13343	14923	13809	37740	40004	38363	34214	20469	20336	19019	23691	12850	10413	13220	14406	11204	10499	10276	11075	10380	10047	9628	10085	20915	20960	20524	20188	15826	15180	15007	15533	12826
141	28369	26207	27680	28245	24020	25585	21957	21091	20868	20188	18833	18754	16665	17729	16590	18597	14644	13538	14364	14461	39140	39885	40222	34195	20777	22133	19367	24066	13106	10972	13804	13682	10782	10782	10566	11070	10190	10413	10019	9997	21723	20466	21070	21320	16304	15459	15064	16010	13134
144	28478	27616	27914	27145	23908	25307	22755	21246	21004	20611	17934	18618	16585	17247	16644	17954	14501	13651	14136	14171	39653	40486	40228	33943	22174	22573	19273	25614	13736	11417	14096	14684	11215	10761	10569	11452	10486	10000	9956	10019	21485	20924	20815	21210	16256	15127	14830	15823	13209
147	28340	26628	27950	27095	23092	25501	23256	21209	20625	20567	18222	18377	16833	17714	16658	18955	14155	13884	14157	13551	40203	41926	40680	33538	21526	22987	20165	24685	13746	11287	14147	14352	10877	10432	10395	11303	10144	10087	9881	9712	21858	21472	20817	20909	16260	15624	14972	16106	13284
150	28425	26463	28451	26295	23957	25186	21790	19856	21560	21001	17364	18602	16950	17804	16107	18181	14808	13872	14816	14162	39961	41526	40437	34551	23458	23540	19796	25233	14863	11826	14349	15100	11109	10336	10687	11161	10219	10002	10005	10053	21777	21533	20889	21766	16248	14871	15312	16151	12782
153	28776	26339	28310	27241	24497	25620	22203	21408	20417	20167	17858	18232	16261	17177	17247	18540	14378	13993	13945	14609	39290	43067	40125	33714	23975	24510	19683	26184	14503	12277	15475	16120	10795	10464	10433	11615	10321	10295	10162	10054	21676	20938	21463	20914	17001	15013	15474	15565	12895
156	28009	26713	27816	25663	23415	24904	22392	20968	20953	20212	19033	18807	16630	17664	17499	18762	14245	14011	14338	14071	39826	40745	40237	33412	24772	24242	19843	26282	15334	12380	16006	15384	10840	10238	10261	11675	10491	10620	9806	10238	22278	20887	21547	21116	16490	15276	15131	16258	12751
159	27664	26969	28183	27936	24343	25399	21112	20656	20820	20628	18251	18805	17137	16507	16622	18456	14767	14009	14632	14053	40321	42063	38617	33627	25508	25066	20120	25570	15629	13275	15822	15689	10735	10656	10734	11643	10387	10538	10095	10023	21907	20828	21258	21348	16475	15316	15020	16082	13114
162	27982	26311	28863	27256	24674	24523	21775	21627	21321	20656	18173	19491	17046	17576	19114	19042	14526	13975	14587	14790	39795	42218	40130	33875	26661	25249	20444	26131	16275	13292	16863	15374	10858	10784	10735	11952	10266	10395	9586	9901	21006	21245	21203	21516	16079	15676	15531	16065	13131
165	28111	26306	27852	26633	23514	26274	22746	20630	21190	20055	18839	19126	16262	18136	16264	18879	14923	14378	14701	14518	41581	40024	39890	34169	26724	26649	20748	26863	15975	13580	17310	16614	10996	10938	10661	11799	10366	10641	9970	9731	22672	20398	21031	21775	16751	15336	15421	16269	13071
168	28646	27007	27217	26690	23153	25981	21289	20594	21088	20166	18831	18810	17124	17683	16719	18658	14909	14137	14253	14405	42245	42277	39909	34455	28092	27349	20671	25602	17103	14111	17551	17246	11009	10761	10769	12396	10381	10576	10354	10281	21773	20275	21552	21192	16239	15404	15033	15953	13391
171	27751	26494	27782	26247	23694	25147	21922	20907	21026	19962	18424	18973	17010	16976	16553	17946	14475	14478	14170	13979	40807	40800	41049	34061	29320	27463	20508	26317	17317	13917	17826	17413	10796	10467	10740	12558	10287	10247	9731	10090	21317	21273	20719	21039	16060	15468	15706	15973	13208
174	28165	26868	26343	26150	24052	24717	21780	21488	21277	20831	18390	18954	16757	17988	16331	19244	15071	14289	14533	14301	41697	41832	40080	33822	28252	27943	21491	26136	17501	13751	18640	16826	11058	10772	10816	12505	10061	9995	9974	9889	22662	22067	20894	21635	16965	15734	15228	15377	12873
177	29026	25931	27440	27518	23560	24851	21877	20307	21272	20474	18700	18385	16662	17934	16493	19697	14593	14698	15212	14920	41767	43722	40309	34628	28638	28105	21046	26364	18436	14595	19143	16654	11198	10708	10702	12445	10170	9956	9919	10265	22196	20695	21096	21277	16404	14959	15341	15823	13658
180	27868	26198	27143	26050	22724	25173	22367	20098	20497	20178	18195	18614	17039	17327	16997	19456	14988	14046	14991	14596	41968	42372	39106	33386	29957	27793	20707	26310	19053	14860	19066	17537	11597	10134	10497	12621	9917	9993	9560	9744	22065	21599	21806	20833	16663	15555	15366	16040	13262
183	28299	26692	29011	27349	23836	25850	21467	20989	21483	19957	18226	18023	16495	17454	16894	19093	14565	14153	14671	14581	42114	42246	40878	34848	30635	28023	21097	26461	19994	15565	19329	17574	11662	10937	10268	13103	10206	10066	10372	10262	21231	21406	21372	20672	16367	15170	14870	16021	12950
186	28262	26088	27331	26142	24007	25452	21851	20641	20693	20040	18850	19176	16813	17539	17160	18560	14762	14805	14945	14420	41092	43317	40192	34353	30046	27772	21149	26254	19906	16538	19723	18004	12432	10355	10521	12696	10478	10237	9760	9866	22588	21206	21561	21084	16723	15744	14607	15769	13244
189	28002	26482	27482	26314	24205	25519	22042	20483	20923	20091	18659	19144	16598	17260	16516	18806	14754	14503	14817	14594	41728	42352	40752	34854	30036	27892	21734	26529	21341	16697	20501	16891	12416	11185	10962	12810	10304	10599	9808	10006	22084	20844	21952	21470	16882	14891	15024	16249	13359
192	27795	26305	28356	26766	23955	25355	20762	20473	20737	19692	18276	19778	16535	17873	17198	18498	15121	14714	14534	14386	42766	44970	40885	34115	30744	27565	21612	25871	22351	18029	19268	18767	12807	11356	10859	12838	10558	10308	10007	9944	22370	21672	21343	21367	16378	15804	15414	16549	13170
195	27648	26004	28033	27317	23788	26022	21357	21380	21490	19718	18377	19149	16954	17770	16789	19222	14609	14683	15022	15079	42246	43280	42581	34633	29097	27652	21200	26366	21748	18376	20886	19475	13804	12119	10515	13238	10351	10103	10133	9861	22119	21970	21065	21712	16835	15391	15387	15675	13576
198	28120	26466	27046	26275	23818	25170	21856	20154	20420	19848	18218	18807	16366	17321	17031	18815	14706	14930	14740	14794	43789	43610	40727	34481	29534	28154	21952	26805	22818	18377	20852	18857	13535	12776	10772	13315	10048	10259	9574	9973	21799	21682	21789	21531	17301	15518	15521	15816	13155
201	28815	26598	27986	26424	22439	25698	21651	20883	20794	19414	18694	19464	16574	17715	17241	19271	14989	14525	14475	14643	44364	43631	41964	35310	31224	28663	21776	26412	23265	19711	22204	19264	14696	12314	10713	13589	10674	10152	9710	9991	21705	20879	21415	21057	16421	16099	15216	15520	13357
204	28089	26117	27787	26745	23197	25236	21716	20750	21427	20123	18652	18873	16331	17765	17185	18337	15361	14967	14143	15063	44125	44647	40017	34725	29967	27650	21710	26612	23731	19844	21197	19378	14736	12958	10673	13351	10286	10120	9812	10260	21781	21307	21384	21588	17198	15766	15330	16176	13660
207	27975	26302	27164	25936	23487	25270	21495	20847	21250	19930	18374	18790	16508	17656	17273	19107	14897	14994	14501	14654	43827	44582	41028	34869	29891	27735	22318	27038	23303	20604	22000	18912	14805	13190	11100	14260	10270	10098	9533	9782	22558	21338	21441	22283	16562	15689	15228	16280	13007
210	27620	26147	26736	25877	23107	25745	21243	20418	20928	19917	18711	18776	17143	17612	16843	19422	14871	14767	14941	15037	44903	44632	42111	34675	29974	27848	21782	26290	23409	19898	21274	19459	15045	13254	10870	13899	10530	10413	10330	9880	22595	20935	22274	21973	16680	15843	15476	15586	12755
213	27397	26190	27525	26582	22985	25842	21769	21198	21116	19862	18324	18991	16802	17544	17292	19620	15259	14828	14445	15116	44029	44347	41727	34612	30337	28220	22261	27028	24133	20379	22227	19559	15622	13485	11179	14241	10516	9898	10074	10243	22170	21985	21561	22207	17270	15618	14780	16599	13259
216	27304	26005	28455	27477	22434	25310	21915	20343	21262	19801	18375	18903	16856	18180	16969	19516	14995	14871	14431	15256	46303	45124	41007	34205	29635	28130	22408	26990	24078	21398	22133	19872	15457	14592	10980	13969	10528	9958	10635	10190	21467	22217	21850	22025	16569	15824	15730	16135	12990
219	27873	25821	29252	27496	23547	24687	21044	21006	20970	19783	18223	18815	17172	17335	17439	18993	15332	15045	14982	15282	45460	46300	42155	34802	30122	29591	22268	26451	23242	21958	22753	19742	15577	14085	11274	14214	10157	9906	10368	10438	21995	21918	21390	20750	16653	15715	15433	16051	13026
222	27561	26296	27322	27322	23544	25227	20871	20678	20864	19347	18222	17701	17069	18118	17274	19506	15171	14845	14551	15679	45486	45232	41568	34566	30709	28482	21835	27150	24097	22021	21966	20055	16028	14371	11796	13825	10290	10286	10622	10526	22382	22104	21437	21217	16982	15824	15454	16219	13211
225	28138	26383	26811	26509	23115	25222	21481	20566	21079	19725	18362	19443	17085	16977	17631	19613	14752	15523	14569	15356	45256	45968	42426	34207	31113	28959	21914	26608	24055	21587	22605	20432	16744	15222	12312	14167	10792	9886	10589	10278	22444	21480	21253	21037	16756	15282	15267	16624	12949
228	27538	25944	28344	27278	23340	25792	21083	20505	20953	19995	18483	19241	16237	16812	17348	18980	15322	15425	15042	15051	45841	44657	42096	35026	31169	29047	22472	26449	25048	22285	22933	20221	17017	15503	12449	14240	11019	10427	10389	10304	21915	20924	21572	21612	17000	16070	15158	15904	13769
231	27938	25760	28604	27233	23408	26369	21293	20333	21023	19765	18240	19118	17020	17855	17599	19059	15436	14981	14847	14929	45321	45405	41252	35699	31103	28845	21683	26482	24459	22322	23348	20439	17275	16249	12493	14104	10999	9983	11083	10598	23103	21450	21181	21222	16876	15724	15214	16466	13295
234	27788	25895	28049	26426	23055	25164	21957	20120	20730	19263	18925	19200	16524	17442	16909	19107	14850	15384	14472	15696	46810	46324	41748	35799	31013	28493	23209	27041	23842	21891	23289	20870	17590	16652	12957	14473	11698	10582	11113	11346	22557	21868	21627	21529	17349	15840	14908	15945	13119
237	28103	25867	27789	27902	23633	25272	22622	20942	20946	19543	17887	18746	16906	17970	17222	18672	15442	15428	15173	15556	46633	45243	41652	34819	30864	29405	23042	26564	24842	22366	23461	20162	18305	17944	13203	14553	11811	10242	11251	10933	22585	21309	21653	21488	17015	15907	15335	16045	13450
240	28516	26309	27063	27248	23031	25987	21845	20900	21165	20278	18608	18748	16722	17065	16813	18290	15728	15597	14833	15094	47176	45665	41860	35474	31140	28864	22635	26599	24706	22386	23631	20709	18492	18147	13298	15292	12228	10336	11730	11171	22316	21199	21634	21608	17254	15668	15323	16093	13396
243	28484	26458	28020	27263	22379	25654	21482	20696	21333	20324	18442	18654	16536	18532	16395	18967	14935	15124	14676	15669	47712	46654	41819	36108	32098	28637	21920	26576	24291	22716	23551	20429	19053	19165	13986	15255	12376	10357	11744	11428	22122	21261	21384	21626	16563	15366	15432	16213	14080
246	28187	26388	26755	27244	23609	26438	21842	21275	21020	20348	18258	18583	17236	18320	16951	18475	15265	15865	14648	14556	47808	46315	41587	35058	31541	28606	22936	26444	24889	23013	23401	20722	19625	18697	14068	15008	12272	10581	11615	11325	21837	21977	22101	21581	16825	15636	15183	16983	13833
249	28558	26352	27578	26581	23610	25714	22388	21132	21048	20122	18990	19519	16813	17815	17359	18556	15438	15162	14780	15038	48707	46623	42020	35354	31680	29135	22606	27588	25437	22455	22959	20758	19650	18507	14935	15514	12527	10505	12017	11720	23151	21469	22745	22285	16867	15554	15365	16661	13284
252	28784	26141	28042	26695	23963	26118	21747	20510	20770	20544	18884	19335	16866	17579	18974	19297	14900	15380	14840	15377	47876	46177	42180	35423	31876	29236	21942	27581	24539	23244	23520	21677	19420	19732	15290	15541	12994	10163	12309	11649	22776	21697	22696	22044	16944	15621	15586	17370	12941
255	28294	25635	27428	27289	22698	25443	22359	20104	21027	19731	18574	19035	16965	17723	18800	19059	15457	15803	15273	15083	49228	45308	40502	35134	30587	29196	21706	27440	24928	22315	23499	20918	19580	20259	15219	15980	12744	10661	12435	12171	22205	21506	22098	21716	16507	16095	15818	16813	13705
258	28905	25438	29163	27094	23286	25818	20402	20217	20832	19747	17353	18515	17192	17210	17329	19329	15347	15301	15378	15005	49272	46682	41769	34990	31633	29469	21829	26990	25082	22524	23556	20624	19870	20438	16590	16894	13104	10733	12309	12181	22432	22549	21507	21780	17405	16120	14891	15963	13166
261	28487	26005	28470	27677	23843	25771	21229	21166	20967	18302	17839	18058	16985	17700	17906	19020	15555	15498	15098	15618	49979	46969	42038	35285	31602	29144	21448	26142	24670	22625	23464	20577	19372	19283	17092	15819	13420	11358	13068	12259	23172	21217	21257	20891	17195	15946	15304	16434	13130
264	29335	26480	27634	26976	23598	25485	20440	21078	20830	19979	18225	19865	16688	17811	17537	19565	15275	15728	14347	15005	49049	46676	42723	36216	30909	29193	20915	27129	25067	22772	23517	21268	19694	19674	17726	16147	13601	11626	13260	12626	22609	21150	21941	21841	16720	15413	15493	16103	13676
267	28088	26005	27595	27644	23793	26579	20646	21321	20410	19696	18248	19472	16673	17655	17773	19616	15252	15333	15080	15339	50283	47248	41496	35759	31929	29336	21618	27039	25360	23155	23402	21005	20463	20567	18298	16452	13745	11955	13247	12632	22762	21409	21599	21132	16924	16365	15531	16486	13144
270	28220	26074	28345	27644	23387	26555	21194	20256	21792	19840	18154	18769	16823	17319	18679	19221	14997	15985	15252	15384	49909	47054	42410	35886	32251	30130	22528	27177	24568	23960	23495	21329	20585	20064	18858	17811	13997	11919	13308	13100	22427	21653	22175	21572	16881	15605	15481	16573	13437
273	28868	25765	28407	27741	24095	25359	22319	20724	21261	20126	18289	19256	16475	17818	17437	18659	15650	15606	15177	15425	49652	47226	41446	35642	32272	29573	22110	27459	25360	23057	23401	20657	20898	19816	18986	17018	14304	12152	13462	12870	22580	21895	20942	21343	17180	15949	15547	17048	13466
276	28393	26248	27572	27541	23735	26070	21505	21128	21193	20552	18609	18592	17004	17663	17129	18863	14886	15295	15048	15474	50803	48183	42773	35739	31873	29721	22946	27191	25099	23045	23792	20954	20283	20898	19266	17100	13993	12741	14015	12936	22495	21487	22258	22313	16949	15338	15005	16682	13271
279	29463	26719	27972	27106	23491	25758	22122	20296	20805	20090	18099	19249	17048	18133	17603	19340	15740	15398	14308	15178	50898	48474	41455	37426	31725	29579	22527	27675	25188	23295	23198	20746	20198	21256	19792	18982	14449	12508	14732	13074	23289	21330	21442	21932	17070	16460	15375	15969	13682
282	28657	26312	28524	27982	23711	26096	22373	20712	21155	20431	18348	19108	17107	17354	16867	19159	15354	15310	14452	15265	49507	47473	42129	36639	31991	29591	23272	27744	25217	23673	23378	20898	20507	20872	19974	17451	14245	13029	14688	13092	22818	21890	20876	21320	17163	15454	15756	16169	13214
285	29542	26548	28127	27779	24079	26110	22552	21406	21140	20688	18769	19147	17116	17494	17248	18916	15292	15956	15046	14975	51272	48037	43180	36505	32046	30103	23365	27409	25872	23807	23628	20947	20295	20133	20389	16697	14465	12909	14144	13801	23379	21986	21732	21842	17093	15776	15118	16492	13297
288	28796	26598	28663	27565	23769	26540	22166	20297	20862	20014	17624	18456	17303	17823	17291	19179	15474	15097	15255	15297	51602	48478	43230	37430	32590	30576	24176	28333	24775	23361	22530	21533	20440	20848	20783	16972	15323	12736	15320	13810	22652	22043	21857	21383	17409	15934	15848	16438	13465
291	28761	26114	27434	27790	22244	26448	22785	21240	21139	19928	17603	18170	17119	17925	17263	20074	15823	15774	14959	15020	51039	48741	41600	37338	32103	29948	24193	27743	24884	23386	23887	21603	20482	21518	20607	17573	15169	13545	14642	14590	23113	21918	21768	22555	17007	16266	15483	16398	13173
294	28648	26588	27454	27583	22630	25932	22540	20785	20975	19947	16746	18760	16875	17466	17059	19322	15111	15690	14775	15535	50618	47379	41850	37432	32503	29684	23399	27488	25078	23925	23332	21085	20773	21383	21652	17940	15165	13092	14848	15430	22606	22102	21709	20894	16548	15475	15593	16714	13428
297	29567	27164	29447	27911	23876	25640	21553	21124	20705	19866	17843	18788	17123	18186	18353	19376	15562	15557	14421	14829	50854	48504	42283	37570	32354	30489	24358	27843	25307	23395	24404	21282	20515	21316	21602	17749	15189	13460	15118	15041	22747	22342	21281	21060	16698	15999	15548	16291	13078
300	28507	26969	29343	28125	23525	25558	21450	20696	21018	20176	17652	18249	16681	17607	17752	19440	15223	15378	14863	15451	51038	48621	41905	37236	32851	30459	24547	28205	25260	23738	23812	21782	20974	21307	21797	17027	15952	13711	14743	15430	22314	21893	22502	21921	17090	16316	15651	16982	13048
303	29737	26983	28709	28028	23507	25692	22285	21317	21308	19498	18916	18734	16992	18192	17779	19521	15059	15915	14412	14892	51980	47951	42124	37085	32323	29966	23321	27700	25653	23778	23774	20976	20697	21847	21853	16841	16221	13646	15362	15329	23191	21660	21688	21153	16795	15618	14986	16446	13179
306	28046	25923	28354	28185	23314	25959	20885	20398	20782	19933	18195	19000	17508	17924	17851	19511	15327	15690	14718	15250	51141	48245	43041	37302	32327	30904	23557	28117	25886	23637	23493	21332	20224	21148	21723	17136	15824	13763	15795	15408	22212	21639	21727	21490	17032	16246	15345	16328	13337
309	29216	26158	29549	28187	23768	26908	21951	21485	21387	19524	16966	18890	16857	16904	17404	19136	15044	15696	14830	15449	51687	49519	41888	37078	33202	30391	22811	28055	26140	24009	23823	21375	20894	21537	22581	17211	16137	13868	15453	15292	23534	22104	22294	21653	17139	15670	15996	16630	13577
312	29536	25836	28368	28225	23996	25851	21775	21345	21081	19328	18333	18907	16442	17246	17034	19581	15346	15428	15006	15492	52043	49015	42396	37409	32916	29941	24925	27798	25626	23903	23748	21487	20985	21248	22274	17626	16601	14437	15107	15277	22653	21475	22357	22156	17414	15649	15741	17006	13705
315	29331	26637	28612	27560	23391	26657	22525	21355	20954	20098	18522	18922	17079	17847	18078	19119	15893	15531	15120	15744	51877	49523	42761	36821	32762	29478	25359	28490	25091	23834	24063	21813	20879	21133	22543	17449	16391	14327	14945	15406	23081	21349	21375	21896	17083	15879	15576	16514	13576
318	29754	26141	29010	27928	23345	26942	21423	21113	21518	20542	18151	18875	16651	17286	17657	18910	14767	16039	14879	15690	51425	48464	41953	36373	33387	30397	25691	28200	25408	23955	23652	21346	20835	21794	23040	18184	16291	15507	15370	15474	22583	21988	21081	21198	16893	16057	15996	16028	13495
321	29694	26978	30204	28697	22796	26497	22163	21254	21558	20502	19016	19029	17093	18251	18912	18800	15013	15146	14687	15793	52494	49193	42093	38518	33669	30433	24478	28204	25855	23766	23830	21437	20415	21328	23009	18620	16201	16214	15300	15492	22500	21647	21770	21818	16402	15815	15333	16231	13570
324	30231	26134	27427	27247	23428	26986	22884	21200	20791	20207	18569	18553	16922	17896	17548	19647	15632	15628	14566	14576	50981	48566	42547	37126	32370	30850	24601	28478	25864	23704	24158	21682	20429	21259	23199	18191	16379	15576	15246	15390	22810	22348	21101	21911	16964	16002	15940	16638	13412
327	29026	26648	27639	27951	23647	26619	22316	21590	21345	20571	19006	19037	16980	17705	18499	20015	15355	15665	14419	16061	52542	49548	42527	37875	33438	30490	25902	28245	25566	23492	24324	21217	20808	21843	23652	17288	16679	15932	15884	15442	23455	21728	22202	22223	17257	15911	16042	16690	13593
330	28921	26734	28222	27795	23577	25810	21395	20538	21480	20899	18787	19531	17430	18043	16984	20027	15609	15634	15104	15676	52633	48780	43207	37678	33250	30851	26033	27878	25326	23811	24273	21263	21248	21343	23484	17920	16523	16699	15613	15711	22934	21501	21763	21513	17326	16168	15202	16986	12966
333	29368	27112	27894	28461	22536	26162	22713	20819	21570	20587	18941	19165	17048	18135	17416	19562	15018	15752	15171	15379	52233	48950	43532	37479	33564	30691	25367	27926	25419	23383	24273	21276	21143	21705	23484	18226	16783	17094	15561	15961	22731	22330	22478	20900	17193	15991	15700	16834	13934
336	29295	26882	29934	27242	22857	26994	22423	20356	21259	20434	17357	19043	17238	17221	18186	19557	15430	15537	15505	14973	53140	49066	43143	37526	33648	30661	24826	28344	25671	23661	24374	21292	20647	21640	23530	17810	16957	17083	15794	15661	23090	21766	21442	20935	17491	15691	15372	16365	13501
339	29796	25967	29166	28293	23131	26446	22137	21316	21969	19392	18526	19106	16486	18218	17751	20016	15242	15759	14703	14998	52310	49436	43253	37922	33552	30334	25475	27573	25340	24119	24473	21524	21038	22547	23790	17910	16952	16768	15401	15247	22526	22262	21480	21683	17308	15778	15560	15876	13766
342	30150	26582	28736	27853	23978	26572	21901	20602	21124	19434	18156	19576	17458	18022	17527	19105	15433	15916	14343	15013	51888	49337	44373	38200	33498	31421	23400	28339	25937	24098	24326	21584	21234	21537	23068	17368	17319	17490	16227	16097	22594	21390	22185	21841	17654	15947	15357	16454	13659
345	29186	27156	28888	28201	22647	26107	22420	20883	20771	19286	18823	19792	17561	18038	18479	19772	15139	15537	15003	15358	53490	49413	43018	37916	33649	31191	25826	27714	25286	23969	24072	21698	21387	21973	24416	17879	17729	16161	15461	15634	22891	22083	21541	22096	16757	15963	15855	15998	13314
348	30156	26897	30061	29031	23867	26526	22430	20666	20197	19739	18264	19610	16809	17798	17734	19021	15471	15868	14853	15956	52761	49753	43120	38822	34026	30042	25091	27885	25927	23605	23834	21462	21621	21305	24106	18784	17187	17005	15856	16285	23166	21981	21388	21256	17158	15651	15733	16719	13760
351	29517	26941	29067	28343	23953	27116	21887	20561	20858	20631	17727	18537	16233	17697	16850	19869	14794	15601	15640	15584	52649	48985	43063	37799	33876	30871	24935	28602	25539	23586	24240	21532	21518	22324	23875	18308	17677	16918	15546	15583	23463	21536	21831	21416	17431	15700	15813	16272	13668
354	30023	26720	29484	28043	23812	26077	21714	21983	21003	20121	18595	19243	17118	18387	17106	19987	15237	15608	15039	15386	54342	49008	42858	39050	34482	30875	26993	28541	25643	23456	23990	21350	21077	21055	23538	17824	17540	17318	15710	15594	23301	21588	22348	22061	16508	16018	16058	16986	13410
357	29106	27495	29912	29234	22334	26663	22718	21095	20867	20085	18233	18755	16749	17476	17243	19666	15267	15048	15446	15271	53456	49224	44181	36894	34816	30957	26558	28932	25813	23926	24336	21682	21651	22322	24131	19537	17119	17418	15666	15966	23356	21432	22476	22552	17029	16381	15678	16601	13442
360	28986	27142	29539	28658	23234	27404	22576	20968	21453	20787	18047	19114	17397	18181	17116	19166	15312	15485	14860	15998	52305	50798	42364	38125	34555	30960	26837	28304	26008	23647	24373	21757	21773	21751	25224	19413	16914	17466	15777	16198	22416	21337	22227	21451	16878	16274	16515	17321	14189
363	30116	26932	27810	28152	23427	26046	22363	21342	21494	20554	18636	19164	17437	18098	17365	19867	15606	15986	14733	15421	53160	50246	43475	37862	34130	31262	27237	29253	25834	23517	24605	21171	21054	22458	24204	18842	16858	16720	16154	15664	23086	21502	21802	21545	17396	16318	15525	17133	13528
366	30325	26569	28424	26872	24270	27079	22221	21637	21537	20503	18657	19781	16965	18416	17867	18599	15478	16094	15091	15071	53204	49365	43998	37378	33881	30737	25920	28306	26099	24326	24974	21504	21318	22289	25312	18588	18067	16914	15815	16213	22854	21769	21117	21435	17097	15931	15814	16692	13473
369	30125	26543	29685	28111	24296	26563	23017	21369	21183	19934	18937	19159	17470	18388	17746	18878	16421	16113	14902	15529	53392	50317	44927	38545	35131	31233	24903	28862	26132	24311	24367	21837	21566	22319	24718	18779	17249	16950	16207	15852	23110	21934	22356	21344	17105	16019	15500	17146	13652
372	29960	26606	28803	28182	24844	26949	21908	20762	21178	20570	18588	19333	16825	18028	17461	19108	15529	15900	14504	14896	53617	50468	43171	39332	33767	31726	25487	28086	26145	23879	24300	22279	21672	22039	24606	18420	17470	17689	15849	16193	23231	22864	21008	20633	16732	15928	15833	16923	14343
375	29719	27046	29058	28122	24817	26806	22702	22123	20952	20514	18585	18824	17795	18396	17364	19297	15617	15569	15142	15115	53315	50028	42218	37786	34381	31678	25995	28767	25864	23875	23996	21740	21231	22454	24096	17942	17545	17105	16399	16033	22984	21146	21723	21611	17545	15863	15833	16154	13819
378	30169	26694	30180	29167	24875	27492	22574	21263	21484	20367	18584	19837	17450	17629	16965	19297	15431	15945	14712	15552	53179	50833	43530	38621	34226	31450	24774	28983	27200	25102	25125	21901	20895	22897	24438	17266	17052	17723	15656	16014	22680	22363	21664	21037	16924	15956	15215	16443	13478
381	29065	26916	29385	28115	24224	26839	21419	21065	21371	19681	18322	19570	17015	17914	18117	19704	15259	15682	14926	15731	52601	49608	42816	39086	34550	31499	25686	28147	25739	24414	24538	21006	21276	21827	24311	17563	17358	17266	16063	16511	22390	21388	22343	22262	17219	15258	15215	16712	13153
384	29439	26530	29349	29252	23629	27143	22333	21506	21173	19782	18507	19154	17300	17781	17528	18272	15175	16143	14760	15457	53557	49954	43676	38264	35461	31451	26008	28549	27418	24439	24826	22127	21531	22134	25432	17698	16921	17990	16594	16596	22654	21786	21556	21783	17634	15585	15551	16418	13268
387	30088	27149	28838	29156	23363	26267	22508	21996	21325	20054	17929	18599	16581	17263	17393	19257	15086	15353	14742	15367	53807	48952	43150	38303	35248	31926	26135	28116	26037	24115	24771	21704	21172	22366	25282	18560	17486	17818	16188	16352	23214	22180	21647	21133	17416	16144	15585	17223	13135
390	29907	27262	30281	29466	23479	26525	21793	21614	20769	20870	18223	19360	16959	17938	17200	19932	15407	15433	14569	15505	54360	50393	42943	38937	34765	31992	28813	29170	26962	24766	24590	22300	21557	22766	24681	18376	17302	17276	15725	15720	22918	22103	21586	21672	16923	16237	16196	16505	13161
393	30967	26937	29844	28105	23724	26947	22809	21338	21839	20779	19122	18920	16771	18155	17055	18676	15898	16315	14444	15749	54001	50577	42840	38615	34441	30568	28058	28664	26597	23548	24534	21988	20930	21965	25141	19424	17855	17773	16396	16506	23188	21660	21741	22214	17236	15987	16438	16787	13468
396	30697	27627	29491	28423	23696	26819	23101	21202	21450	20261	18866	18835	17173	18500	17430	18982	15714	15459	14939	15080	53977	49749	43098	38914	34675	31699	27042	28982	26804	24118	24306	22820	21544	22354	25767	19231	18047	18022	16251	16160	23523	21697	21415	21284	17596	16132	15907	16656	13377
399	31097	26980	28000	27863	23354	27487	23329	21818	22194	19915	18415	19387	17074	17971	17286	19187	15391	15635	15120	14967	54584	49879	42955	38431	34508	32066	28894	29794	26525	23520	24704	21381	22221	22471	25409	19330	17225	18144	16218	16224	22861	21762	21906	21888	17285	16053	15507	17466	14017
402	29242	26658	28617	27784	23723	26669	22052	20977	21402	19927	18598	19951	16995	18655	18079	19721	15632	15630	14875	15087	54171	50517	43337	39186	34197	31758	28134	29358	26396	24647	24453	21779	21534	22272	25583	18766	17945	17831	16474	16633	22288	21569	21704	22403	17218	15689	15732	16908	13628
405	30135	26545	29632	29284	23540	28462	21797	21004	22041	20952	18538	19654	17079	17943	17733	18868	15897	16303	15349	16030	53975	51621	43812	39119	34733	32827	27039	29783	26135	24506	25796	22295	22126	22268	25552	18805	16883	17904	16185	16387	23643	21902	22511	22561	17294	16002	15507	16620	13828
408	29972	27044	29367	29953	23540	26772	20699	20618	21724	20860	17828	19463	17832	17817	17349	18391	15405	15498	14822	15187	53993	51323	42953	38561	35270	31691	25996	29577	26743	24213	25414	22185	21363	22776	25981	18378	17252	18297	16428	15733	23271	22592	21664	20716	17243	15598	15692	16667	14034
411	29368	27049	31567	30074	24174	26627	21707	21820	21283	20307	18581	19374	17177	18509	18309	18944	15443	15361	14851	15011	54128	50812	43965	39805	35779	31696	25002	29776	26555	24357	24954	22388	21146	22819	26157	18517	17323	17868	16178	16244	22675	21671	22550	22002	17703	15572	15262	16608	13522
414	30240	27338	29737	28532	23670	26939	21647	21298	21346	20099	17859	18942	18054	18588	17616	18998	15986	15530	14316	15429	53476	50635	43329	38869	35261	31900	26014	28648	26287	23863	24492	21826	21446	22686	25078	18048	17838	17878	16293	16346	22895	21753	21685	21710	16706	15923	15573	16305	13483
417	30688	27500	29698	28334	23949	27452	23198	21564	21630	20612	18143	19243	17530	17968	17615	19421	15734	15578	14533	15381	54340	50247	43583	39517	35622	31809	25394	29344	26380	24024	25000	22312	21743	22669	26094	17622	17688	17743	16281	16330	23518	22221	22691	21245	17157	16156	16251	16421	13828
420	30690	27407	30870	28421	24234	26687	22400	21214	21874	19592	18971	19517	17242	17292	18438	18557	15137	15838	14945	15374	54490	50678	43209	39619	34915	32211	26179	28610	27121	24003	25153	22695	21941	23712	25525	17459	17581	17963	16863	16319	23407	22729	21951	21649	17425	16001	15480	17144	13821
423	30395	27012	30976	28870	24603	27094	22792	22089	21393	20977	18363	19216	17295	17641	17480	18705	15391	16268	14855	15666	54090	50435	43193	38513	36331	32106	25253	28773	26760	24414	25569	22099	22109	23065	26307	18363	17490	18177	16390	16292	22633	22328	21035	21520	17669	15895	16085	16900	13169
426	30179	27180	30367	28906	24659	26413	22063	22017	21724	20339	19142	19411	16966	18005	16920	19892	15479	15804	15152	15882	54067	49955	43390	39630	35773	31708	29254	29182	26980	24427	24856	22354	21455	23238	25601	18381	17725	17871	16495	16050	22829	22233	21503	21216	17623	16166	15677	17001	13767
429	30130	27150	30239	29302	23460	26498	22943	22721	22134	20130	19104	19534	17437	17640	18043	19020	15462	15794	15219	15661	54592	50538	43566	38849	35655	31701	27873	28934	26896	24649	24834	21530	21614	22690	26279	18973	17495	17844	16394	15881	22233	22127	22315	22190	17907	16410	15564	17123	14258
432	31220	28211	30227	29124	23042	27502	22880	22419	22671	20353	18681	19708	17329	18528	17668	18927	15650	16391	14890	15636	55160	51127	43958	39198	36133	31603	27505	29114	27345	24817	24526	21992	21811	23033	25878	20056	17698	18220	16567	16482	22793	22245	21868	22074	16925	16004	16338	16961	13771
435	31137	27992	28833	28086	23269	26745	23371	21630	22264	20188	18981	19860	17140	18821	18657	19834	15233	15718	15177	15281	54531	50373	43156	39217	36053	32631	27933	28694	26599	24531	24942	22604	22235	22482	25997	19832	18041	17654	16312	16377	23385	21984	22200	22036	16950	16037	15950	16527	14073
438	30750	27699	28194	26936	23708	28068	23539	21643	22100	21101	18821	19482	17264	18995	16984	18898	15953	16092	14990	15593	55205	51187	42986	38815	35673	32206	28153	29458	26750	24404	24803	21474	22826	23144	26320	18401	17729	18380	16647	16624	23356	22680	22559	22366	17182	16325	16031	17340	13900
441	30597	27719	28148	27254	23788	27245	22957	21792	22097	20936	18119	19127	17524	18380	17232	19508	15351	15551	14961	14996	54835	52012	43895	39958	35753	32235	26911	29763	25935	23851	25301	22264	22019	23119	26078	18203	17504	17809	16401	17271	22769	22019	21713	22111	17466	15836	16230	17111	13401
444	30406	27944	29223	28178	23623	28639	22674	21670	21914	20573	18611	19952	17414	18139	17169	19238	15364	15769	14261	15677	56219	51361	43951	38315	35837	32730	26496	29328	26668	24460	24932	22558	22183	22875	26368	18428	17251	18107	16267	16156	22915	21977	23246	21202	17478	15734	15765	17205	13806
447	29722	27558	29304	28164	23514	27057	22441	21821	22074	21488	17252	19547	16843	17924	18931	20095	15512	15673	14602	15647	54933	51124	43041	39019	35534	32435	26043	28540	26758	24717	25068	21892	21533	23278	26177	18695	17406	18198	16751	16391	23373	22096	21412	20854	17427	16218	15694	16348	14058
450	30469	27885	32261	30767	24804	26460	21316	21629	21737	20580	18349	19229	16998	17919	17447	18522	15373	15995	14195	15448	53915	51095	44522	39530	35555	32035	25678	29106	26852	24401	25076	22253	22371	23654	26653	18316	17942	18082	16043	16382	22805	22430	21927	21848	17882	16533	16332	16373	13386
453	30703	27782	29648	28175	23869	26592	22197	21724	21531	20227	18691	20256	17155	18511	17653	18992	15168	15191	14717	15737	54875	50601	44124	40212	37132	32219	26462	28599	26811	25124	25259	22556	22182	23466	26059	17721	17860	18214	16514	16853	23523	22875	22456	21740	17249	15880	15869	16579	13350
456	30686	27847	29848	28779	23580	27570	23017	22369	21979	20444	18521	19428	17432	17780	17366	19423	15676	16049	14778	15952	53757	50384	42700	38714	36703	32007	25774	29936	26667	25341	25393	22285	22117	22268	26212	18576	17560	18026	16803	16774	22287	21790	22320	22494	17418	16162	15795	16740	13608
459	30469	27863	30165	29650	24975	26937	22145	21485	21698	20260	18954	19820	16921	17528	16956	18610	15786	16087	14850	15540	55060	52190	43903	38897	35910	31968	26259	28837	26948	24426	24962	22825	22265	23887	27048	18237	17761	17908	16882	16573	23222	21987	22301	21778	17761	16267	15807	17002	13748
462	30825	27941	30378	30215	24787	27558	22785	22233	22091	20817	19456	19762	16397	17683	18353	18934	15293	16193	15208	16120	54085	50680	44615	39636	35305	31881	25661	29007	26311	24972	25344	22145	22975	23536	25871	18534	17937	18235	16105	16060	23443	22267	22501	21461	17426	16097	16558	17070	13417
465	31245	27546	30134	29497	24918	26636	22970	22022	21733	20672	19380	19609	16908	18893	17887	19752	15990	16105	15376	15609	55154	51345	42874	39246	36182	32957	27836	29609	26691	25100	24664	21956	22227	22979	26882	18303	18480	18094	16935	17424	23363	22517	22479	21829	17199	15797	15967	17153	14556
468	30476	27466	30297	30364	23287	27124	23677	22175	22092	20653	19302	19232	17633	18467	17906	19585	15473	16208	15080	16057	54494	51640	43823	39802	35560	32760	29522	29183	27323	24329	25013	22185	22366	23456	26456	18671	17841	17856	16731	16528	23589	22640	21638	21699	17465	15722	16395	17874	13831
471	30579	27893	31556	30142	23812	26975	23061	22208	22185	21398	19680	19479	17484	18248	17754	19249	15610	16325	15155	15275	55819	50764	44766	39404	36544	31798	27553	28979	26535	23987	25986	21795	22530	22589	27429	18095	17535	18454	16436	16600	23744	21614	21646	22107	17479	15426	16035	17687	14184
474	32048	28352	28969	28709	24035	27736	23479	22097	22077	21667	19002	19317	17388	18548	18071	19518	15592	15749	14243	15554	55410	50922	44136	40311	36636	32630	28477	29763	26144	24802	25449	22625	22801	23276	27226	18862	18038	18112	16377	16425	22423	21859	21865	21641	17189	16211	15990	16786	14142
477	31077	28260	28649	28444	23344	26881	23479	22442	22904	21365	18900	19290	17355	18706	17359	19519	15915	15399	14832	15121	54785	51233	43220	39974	36316	32015	29067	30085	26696	24917	25233	22450	22546	23611	26661	18796	17843	18058	16237	16852	23719	21806	22592	22265	17219	16170	15960	16823	13896
480	30407	26788	28311	28323	23870	27003	22549	21784	22631	21219	17764	18918	17466	18585	16951	19486	15391	15858	14925	15954	56238	51409	44381	39917	36401	31672	29170	29938	27251	24043	25661	22088	22011	22776	27127	18383	17707	18140	16680	16490	22962	21927	21784	21228	17028	15822	15883	16840	13395
483	30610	27328	29146	28860	23568	28832	23222	20971	22224	20980	17996	19608	17560	18541	17658	19592	14735	15446	15148	15079	55129	52087	43407	40100	36223	32656	27679	29678	27139	24809	24875	22465	22859	24026	28262	18293	17190	18210	16831	16991	22957	22380	21536	21289	17170	16758	15928	17266	14136
486	31029	26838	30526	29694	23693	26865	22935	21457	22292	21698	18740	19345	17658	18332	17767	19862	15687	16128	15369	15219	55102	50964	43066	39575	36088	33082	28597	29564	26766	24509	25243	22768	22278	23306	26862	17920	18492	18351	16543	16649	22756	22279	21886	21442	17374	16178	15503	16649	13683
489	30541	27680	31514	30729	24331	27210	21389	21442	21869	21207	18666	19367	17123	19118	17763	19920	16156	15805	15416	15679	54044	50898	42702	39793	36666	32054	27962	30239	27947	24310	25340	21734	22220	23399	28226	18584	18046	18124	16709	16541	23364	22480	21214	21265	17373	15987	16013	16650	14239
492	30699	28535	29606	28889	24544	25640	21521	20595	22315	20866	19015	20304	17551	18911	17895	19268	15611	15665	15332	15843	54549	51366	44311	39541	37283	32667	28046	29743	27104	24341	25337	22332	22820	23190	27795	17976	17969	18257	16851	16758	23829	23217	22313	22145	17493	15942	16003	16649	14202
495	30919	28375	29006	28929	24727	27066	24003	22654	22922	20891	19018	19997	17757	19141	17989	19811	16349	16278	15199	15491	56057	50869	42815	39921	36561	31842	28711	29895	26928	24506	25369	22751	22126	24130	27897	18161	17726	18320	16742	17137	22881	21635	22352	21980	17819	15986	16115	16917	13730
498	30070	27316	31051	30232	24148	26986	23626	23167	22448	20668	19262	19886	17289	18472	17831	18719	15602	16127	14945	15236	54350	51092	45091	39693	36191	31444	27944	29733	26523	24810	25481	22782	22951	23778	27029	17986	18042	18690	16562	17048	23460	22872	21483	22235	17214	16242	16366	16469	14337
501	31098	28088	30997	30755	25146	27395	23716	22829	22475	20906	18752	19528	17571	18693	17572	19789	15627	15633	14852	15471	53942	52124	44043	39288	35971	32351	27414	29549	26662	24451	24876	23123	22336	23676	27213	18590	17994	18107	16724	16589	23550	22717	22656	21851	16940	16150	16365	17200	13716
504	31526	28180	30536	29983	24804	28111	22472	22180	22112	20964	18372	20140	17430	18196	16690	19795	14973	15644	14972	15577	56358	50890	43448	40356	35949	32099	29062	30357	26756	24451	24912	22672	22765	24156	27015	19325	17529	18292	16440	17224	23475	23547	22029	21731	17380	16050	15987	17353	13908
507	31806	28371	30595	29591	24418	27584	22984	22695	22645	20614	18790	19610	17252	19124	17190	20071	15653	16067	15187	15404	55592	50999	43627	39309	35975	32955	30842	29851	27194	24203	25330	22214	22536	23382	27713	18435	17802	18070	16735	17017	23611	22664	21418	20580	17057	16260	15623	16615	13759
510	30457	27797	31030	30614	23979	27718	24268	22766	21918	21452	19875	19094	17384	18401	17833	19454	15548	15193	15055	15630	55808	51232	44202	40410	36689	32793	28317	30162	26404	25205	25387	22765	22780	23287	28497	19478	18149	17953	16892	16703	23177	22158	22191	21909	17716	16120	16376	17447	13945
513	31455	28407	30583	30793	24409	26779	23490	22455	22741	21371	19539	19601	16980	18803	17777	18900	15769	15504	14763	15816	56087	51685	43577	39919	36327	32662	28930	29328	27233	24897	25781	22074	22155	23802	27732	18923	17945	18117	16864	16849	22770	22220	21638	21773	17324	15868	15607	16817	14223
516	32086	27896	30661	30041	24774	28801	23690	22336	23479	21229	18950	19956	17615	18186	17967	19072	15409	15654	14843	15562	55670	51472	43889	39242	37863	32514	29106	30073	27703	24600	25296	23423	21751	23521	27884	19902	17958	18569	17395	16593	23089	21994	21406	21721	18043	15928	16106	17093	13266
519	31832	27823	28219	28044	24785	28413	22878	22117	23129	21221	19143	20285	17348	19162	17858	19942	15684	16403	15074	14864	55343	50587	43094	39939	37544	32336	31033	29842	27028	25783	25295	22221	22962	23731	28756	18836	17730	17782	17156	16242	23099	22291	21976	21625	17544	16021	15543	16899	13922
522	31262	28532	29294	28549	24202	27422	24128	22353	22291	21462	18743	19712	17502	18628	17719	19350	16161	15884	14950	15558	56211	51958	45037	39711	37323	32282	30392	29193	27395	24813	25813	22571	22453	23229	28375	19098	17340	17912	16761	16948	23530	22033	22317	21774	16976	15926	16570	17400	14224
525	31764	28578	28466	28404	24531	28228	22366	22667	21981	21743	18735	19360	17833	18956	17462	19328	15944	15691	15167	15592	55188	51373	44698	40442	36059	32843	29452	29376	27285	24694	25744	23522	22645	23254	28544	18757	18075	18547	16783	16550	23305	22685	21562	21355	17879	16560	15676	16677	14464
528	31604	26906	31863	30940	24613	27003	22823	22574	22189	20740	19508	19479	18369	18532	17848	18954	15867	15844	15223	15506	54492	51605	43503	39698	36337	32187	28236	30089	27033	24718	25129	22196	22131	23346	28000	18402	18255	18188	17105	17133	23128	21972	21747	21032	17392	16587	15966	16649	14254
531	31202	28285	31012	30672	24425	26938	23353	22273	23558	21399	18905	19534	17113	19142	17399	20557	15638	16030	14740	16185	55971	50936	43742	40386	36593	32909	27161	29741	26661	24941	25367	23057	22564	23995	27998	18375	17839	17931	16806	16670	23639	22328	22134	21504	17342	16153	15409	17532	13907
534	31222	28231	31444	31883	24975	27678	22008	21574	22773	21397	19020	20124	17321	18715	17736	19915	15922	15990	14878	15903	55683	50664	43793	39968	36513	32652	27429	29903	27113	24747	25452	22869	24182	23734	27811	18214	17636	18113	16603	17096	22959	22581	21624	21453	17547	16301	15707	16963	13941
537	30663	27683	32322	31720	25960	28165	23432	23172	22529	21222	19517	19655	18035	18808	17393	19700	15358	15735	14881	15680	54756	51638	44003	40239	36268	32636	28540	29870	26936	25195	25523	23717	24526	23935	28153	17806	18035	18224	16684	17227	23288	23486	22084	21377	17614	16454	16105	17170	13678
540	30766	28523	31718	31017	25633	26489	22179	20942	22525	21510	19573	19987	17324	19001	18323	20278	16101	15873	15298	16094	54297	50694	43055	39952	36769	33313	26350	29820	27306	25064	25652	23326	23750	23366	27536	18779	18015	18405	17431	17498	23627	23768	21879	21632	17560	16129	16265	17404	14416
543	31820	28243	31726	30425	25383	27355	21774	21902	23019	21103	18303	20548	17518	19619	17273	20151	15915	16340	14682	15696	56076	50649	42923	40127	36956	33078	24998	30041	27926	24975	25209	23249	23280	24005	28360	18744	17177	18455	16943	17065	23711	22585	21951	21927	17509	15943	16330	17276	13374
546	31715	28078	31102	29663	26075	27103	22930	22084	23331	21482	18393	19808	18030	18731	19037	19736	15956	15483	15286	15947	56235	52090	44208	40282	36170	32309	26870	29938	27504	24630	25518	23299	23613	24580	28480	18063	17745	18446	17537	17356	23761	22292	23155	22232	17034	16145	15963	17308	13812
549	31512	28589	29366	28581	25044	29021	24034	23237	22927	21441	19589	20260	17274	18820	18164	19214	15856	16244	14860	15847	56114	51891	44596	40367	36682	33152	28912	29744	27409	24211	25284	23109	23870	24223	28098	18004	17890	18981	17250	17043	23054	22001	22133	21665	17681	16592	15979	17092	13498
552	31869	27961	29930	28774	25440	28196	21597	22393	23145	21097	19381	20023	16924	18624	17881	19337	15766	16211	15296	15930	54712	51672	44407	40270	36600	32472	26119	29599	26819	25190	25936	22355	24424	24383	28930	17968	17821	18527	17389	17078	23083	22271	22290	21459	17725	16071	15539	16947	13923
555	31139	27395	31149	28966	25680	27464	23147	22944	23020	21879	19105	20339	17782	18318	17235	20312	14961	16414	15147	15746	55688	51692	44047	39855	37009	31907	27771	30234	27007	24685	25854	22313	23943	23669	28369	17899	18049	18848	16948	16665	23309	21867	22625	21572	17572	16172	16048	17353	14158
558	31412	27270	32243	32227	24942	26859	23542	22737	22589	21055	18387	19632	17392	18239	17897	18367	15741	16155	15052	15416	55757	50376	44146	39213	37643	32749	28311	30206	27449	24856	25510	23245	23990	23892	28413	18144	17635	18285	16913	16905	23732	22683	21860	21685	17524	16374	15651	16837	13553
561	31859	27781	32713	31450	25441	27315	23729	22870	22703	20993	18661	19990	17338	18682	17808	18642	15758	15550	15037	15403	55811	51825	44965	40190	36988	32627	26970	29212	27138	24973	26053	23117	23857	24051	29043	18778	18542	18518	17160	16829	23644	22762	21852	21489	18043	16369	16355	17770	13861
564	32098	28102	31393	31417	25611	27876	24052	22685	22891	21148	19351	20358	17353	18988	17865	19620	15675	15859	15306	15821	55892	51020	44291	40173	37551	32862	28691	30051	27291	24864	26006	23325	23889	23716	28974	18943	18292	18377	16674	16935	23466	22421	22724	21475	17119	15891	16364	17062	13592
567	31743	27812	32064	31702	24808	27710	24273	23301	23019	21465	19008	20156	17324	18361	17645	19936	15792	15678	14657	15502	56820	50545	43048	40388	37880	32185	26832	29304	27378	24825	26252	23364	23332	23815	28629	18373	18142	18019	16868	17474	23895	22386	21327	21977	17237	16227	16044	17507	13727
570	31802	27186	32020	30074	25168	27605	23374	22666	22385	21749	18359	19960	17318	18492	17085	19081	14685	16077	15293	15698	55597	51771	43948	40200	36910	32706	28781	29714	27899	25796	25857	23600	24728	24162	28841	18430	17928	18953	16862	17076	23625	22560	21572	21348	17751	16598	15829	17277	14031
573	30907	27794	32196	31774	25494	28150	23715	23031	22682	21248	18713	19793	16909	18761	17234	20445	15427	16332	14870	16119	54817	52305	44339	40683	36755	32500	29786	30369	27965	25861	26207	23307	23842	23648	29041	18924	17700	18229	17205	17041	23438	22613	22700	21797	17501	16364	15505	17037	13642
576	31897	28402	31534	31071	26013	26923	23556	22714	22252	21093	18906	19719	17382	18249	17464	20093	14762	15980	15073	16005	55843	51474	43813	40187	36261	33286	26409	29775	27257	24672	25124	23724	24470	23461	29355	18149	17888	18860	17255	16761	23435	21888	21891	21472	17364	16891	15961	17767	13603
579	31544	28166	32710	32354	25562	27947	23918	23180	22149	21805	19489	19613	17218	18381	17679	19466	15479	15571	15084	15664	56035	50983	45221	40389	37267	33795	28493	29656	26707	24659	26162	23214	23976	22960	28811	18572	18257	18940	16846	16943	23245	22658	21391	21379	17723	16376	15964	16590	14065
582	31087	28788	32437	30456	25593	28339	24625	22669	22038	20698	19393	19297	17350	17877	17999	20141	15344	16406	15331	15829	56468	51306	43861	39998	36937	33162	27571	30261	27039	25406	26252	22529	24231	23451	29249	19016	18195	18344	16863	17131	23494	21754	22246	21826	17483	16197	15981	17722	14251
585	31642	28350	32660	30386	25440	27770	23647	23590	22461	20673	18922	19921	16767	17863	17822	20462	15026	15617	15034	16249	55967	52050	43742	40272	37032	32826	28301	30386	26600	24896	25217	23350	24323	23176	29187	18929	18166	18353	16754	16890	23249	22258	22000	21486	17712	16839	15835	17318	13736
588	32096	28912	32018	31283	25283	27692	23607	22694	21852	20928	19502	19682	17766	18206	17212	19992	15637	16140	15250	15701	55465	52340	43898	41009	36491	32764	29022	30672	27564	24384	25395	23135	23885	23095	29064	18838	18294	18454	17496	16813	23573	22077	22108	21515	17329	15904	16315	17520	13669
591	31871	29146	32223	30816	25589	27775	23808	22225	22827	21225	18909	19876	17249	18461	17612	20314	15609	16365	15259	15961	55125	51660	43506	39924	37041	33081	30785	29985	27632	24922	25802	23401	23803	23604	28838	19342	17643	18477	16932	16891	23675	22967	22239	21381	17439	16028	16232	17135	13797
594	32181	29372	31497	31387	25252	27770	22919	22347	22534	20807	18413	20170	17588	19017	17764	19405	15778	16216	15458	15609	55362	51704	43765	40390	36983	33370	28389	30219	27855	25243	25269	22451	24148	23547	29733	17684	18350	17967	17042	16987	23224	22637	22162	22709	16737	15655	16312	17527	12742
597	31663	29322	31688	31197	24622	28119	23323	21461	22845	21950	18956	20221	17538	19040	18085	19319	15532	16070	14937	15806	56346	53007	44246	40392	36838	32969	26182	29786	26575	25016	26259	22632	24544	23006	28559	18388	17981	18604	16600	16966	23207	22467	22942	21884	17985	16284	16334	17773	13307
600	31797	29080	32493	31319	25249	27459	23641	23129	22171	21661	18746	20507	17160	18620	17416	19988	16459	15924	14862	15930	55037	52944	43186	41525	36869	32784	28279	29789	27793	24236	25769	23157	24547	23755	29003	18917	18281	18539	16837	17229	23349	22503	21714	21905	17558	16568	16146	17295	14083
603	31289	29424	31969	31306	24467	28755	24430	22232	22614	21292	17778	19632	17060	18959	18341	18939	15575	15938	15494	15975	56542	52142	44737	40874	36995	32974	27908	30135	26916	24605	25593	23900	24049	24002	29627	19289	17948	18372	17299	16811	23551	22408	22714	21647	17721	15931	16147	17934	13920
606	31045	29097	32802	31723	25399	27607	23735	22194	22937	22162	18631	19187	17245	18872	18037	18682	16180	16088	15118	16045	56553	52045	43961	40530	37523	32502	28479	29576	27137	24712	25575	22955	23837	23715	29345	18103	17694	18745	17123	17157	22502	22299	22361	22172	17648	16638	15955	17620	13744
609	31772	29341	32901	31858	25460	28599	23524	22468	22410	21790	18300	19528	17104	18512	17991	18873	15305	16489	15933	16148	56430	51881	45132	40680	37062	33676	27888	29825	27118	25042	25968	23189	24237	23937	29728	19145	18011	18635	17178	17082	23121	21925	22203	22333	18136	16247	16582	17496	13923
612	31872	29063	32129	31251	24783	27327	23153	21416	22517	21593	18747	19321	17940	18867	18213	19110	16119	16214	15452	16052	56528	52993	44580	40128	36787	33873	29614	29587	27317	24418	26108	23577	23674	23385	29011	18656	18114	18221	17046	16951	23067	22227	22444	22772	16919	15990	16436	17392	14210
615	31821	28794	32882	31765	25445	28021	23915	22838	22657	21361	18606	19228	18071	19487	17857	19494	15597	15637	15437	15794	56506	52975	45122	40679	37325	33170	29463	29662	27216	24404	25774	23448	24052	22949	29117	19393	17921	18663	16824	16933	22356	22507	22007	21790	17431	16827	16005	18046	13726
618	31376	28541	32693	32028	25261	28125	23326	21953	23367	20858	18161	19709	18050	19377	17078	18595	16022	16194	15272	16216	56138	53005	42963	41159	37671	33790	29696	29812	27659	24452	26426	23392	23649	23645	29862	18575	18256	18736	17242	17064	22974	22329	22217	22592	17657	16587	16154	17687	14071
621	31980	29608	32375	32172	24970	27635	23158	21927	22357	21250	17609	19436	17276	19075	18254	19611	15943	15507	15571	15803	56021	53214	44465	40683	37317	32741	31001	30174	27467	24749	26369	23122	23284	23364	30361	18592	18365	18215	16603	17074	22826	22648	22600	22053	17541	16428	16272	17357	14325
624	31664	28650	32261	31172	25073	28694	22687	21433	23580	21763	18507	19369	17976	18684	17821	19092	15955	16243	15090	15273	56123	53283	43281	40294	37388	32356	31120	29949	27216	25558	25978	23134	23289	23855	29476	19001	17621	18480	17210	17464	23481	23133	22015	22585	17519	16305	16264	16495	13574
627	32082	29834	32189	31570	24658	27883	21999	21518	22699	21314	18340	20002	17684	19113	17691	18774	15977	15943	15452	16260	56568	53280	44803	40718	38073	32978	28062	29263	27131	24725	25659	22927	23750	23516	29691	20005	18431	18608	17179	17136	23398	22195	22737	22425	17352	16215	16025	17576	13655
630	31994	29175	32547	30923	25555	28503	22653	21477	23149	21461	18340	20653	17693	19011	18313	19427	16427	16307	15106	16722	56501	51105	44840	40797	38435	33352	31248	30787	27706	24931	25919	23243	23831	23511	30427	18779	18187	18484	17301	17475	22664	22468	22379	22281	17913	16610	15985	17573	14150
633	32513	28959	32347	30539	24752	28141	22369	20728	22513	21615	19234	19988	17909	19403	17697	19024	16331	16226	14740	16435	55744	51859	43657	40481	38339	33766	32376	29658	27262	25031	25821	23600	24124	23427	29874	18769	17783	18893	17492	16635	22935	22375	22823	22709	17359	16050	16336	17112	13534
636	31660	28928	32354	32468	24556	28011	24189	22836	22539	21238	19022	20352	18036	19106	18307	20056	15522	16088	15127	16170	56197	52918	43692	40618	37527	33299	30166	30182	27589	24392	26008	23198	24419	23349	29421	19612	18371	18358	17222	17035	23079	21941	22510	22158	17088	16437	16485	17279	13301
639	31768	28796	31599	31710	24397	27978	24306	23610	23419	21659	19358	20787	17959	18821	18725	20728	15766	16097	15066	16070	56493	51316	43528	40844	37191	32768	31221	29980	27486	24815	25694	23171	23572	23470	29452	20612	18412	18818	17215	17090	23603	22568	23090	22568	17645	16314	16501	17687	13599
642	32375	29313	32917	32480	24617	28749	24217	23653	23118	21898	19722	19642	18071	19083	18588	20168	15820	16126	14883	16214	56638	52392	44000	40392	36589	32596	33021	30406	26837	24944	26038	22564	24085	24035	29758	20398	18190	18784	17000	17557	23424	22053	22675	21236	17449	16373	16649	17377	13923
645	32047	28907	33155	32835	25094	28684	24162	22871	23363	22001	18969	19518	17969	19352	18222	18965	15957	16399	15558	15886	55488	52074	43918	40829	37579	32856	29682	30403	27666	24669	25921	23213	24385	24133	30102	18187	17910	19048	17306	17411	22527	22743	22165	21825	17488	16632	16586	17256	14082
648	31844	29808	33610	32706	25296	27882	22947	22201	23722	22113	18215	19769	17953	18741	17848	19632	16600	15983	14893	16098	55316	51506	43635	40177	37951	33488	29756	30368	27253	25149	25236	22535	23937	23253	29562	19013	17499	18536	17265	17496	23740	22065	21870	22504	16989	15576	15861	17513	13934
651	32407	29453	33213	32008	24505	27701	23351	22055	23082	21802	19060	19617	17707	18620	18509	19427	16098	16036	15185	16423	55808	52415	44144	41031	37447	33182	30262	29452	26907	24393	26228	23221	24108	22718	29436	19162	18439	19111	16827	17115	23122	21763	22093	22194	17314	16498	16538	17999	13716
654	32157	29657	32681	31326	23268	28294	23225	23318	22994	21321	19227	20241	17380	18453	18335	19700	15780	16203	15703	16032	56174	51903	44192	41576	36887	33213	31382	29494	26347	25168	25432	23371	24336	24013	30007	19134	18108	18650	17177	16810	23263	22550	22147	21754	17079	15814	16846	17303	13834
657	32048	29410	32666	32323	23594	27825	23787	22243	22445	21150	19388	20616	18077	18728	18141	19665	15593	16467	15061	15777	55733	52833	44551	40713	37102	33530	30598	29209	27043	25177	25671	23681	23601	23258	30334	18761	18346	18397	16705	16867	23818	21897	21813	21697	17246	15879	16253	18340	13975
660	31482	28434	33268	31922	24816	27655	23796	22717	22866	21438	19636	19802	17939	18572	18250	19184	16163	16696	15405	15780	56173	51536	44772	41190	37519	33793	30428	30426	27831	25277	26245	23477	23641	23528	30311	18416	18275	18593	17970	17359	23904	22176	22259	22836	17176	16276	15902	17299	14296
663	32784	29404	32612	32497	24321	28049	22981	22614	23650	21689	19141	20432	18348	19111	18284	19193	16211	16229	15239	16966	56657	51398	43813	41464	37801	33114	31788	30430	28108	25100	26736	23693	24083	23446	30109	18640	17857	18777	17644	17516	23464	21740	22435	22929	17060	15844	15799	17382	14008
666	32442	28924	32741	31922	24860	27842	24343	23297	23254	21097	19687	20825	17633	19142	17959	19710	15642	16098	15636	15896	55730	52534	43262	41133	38124	33354	29163	30281	27365	24798	26359	22805	23958	23963	29903	19139	18045	18133	17787	17314	23321	22130	22231	22042	17630	16620	16356	17533	13676
669	33043	29012	32630	32518	24088	27781	24171	22584	21680	20724	19540	20900	17859	19119	18567	19724	15611	16167	15433	15979	56472	51797	44522	41259	37494	33988	27456	29272	28157	24598	26397	23158	23978	23877	29948	18864	17777	18619	17571	16737	23482	22565	21711	21805	16203	15904	16396	18132	13920
672	32565	29088	32412	31708	24845	27759	23920	23816	21754	21572	19251	21062	17719	19194	18458	20118	15769	16194	15187	16059	54769	52766	44077	41854	37087	33415	28375	29364	26904	24923	25864	23735	23792	23578	30313	20162	18307	18855	17264	17162	23600	22987	22597	22265	17042	16379	15719	17474	13687
675	32536	29499	32983	31852	25987	28882	22071	21794	23056	21465	19928	20747	17755	18495	17886	19074	15994	16433	15744	16174	57539	53174	45595	40811	37730	33543	27047	30027	26680	24811	26198	23298	24173	23483	30328	19607	18078	18700	17594	17803	22935	22351	22634	22568	17425	16120	16088	17609	13751
678	31687	29223	31440	32727	25066	28099	24182	22262	23243	21528	19133	19782	18771	18754	18401	20419	16186	16426	15697	15589	55706	51298	44135	41480	38460	33989	26616	30651	28277	25769	25252	23132	23362	23590	30397	19069	17847	18422	17107	17018	23209	21674	22770	22484	17378	16205	16438	17656	13815
681	32074	29117	32628	31992	24979	28397	21438	22331	23132	21663	18277	19995	18327	19003	17916	19958	15751	15812	16035	16177	55896	52397	44487	40373	37049	33386	28346	30599	28182	25051	26743	23562	24952	23442	30317	19102	18759	18274	17462	17340	23264	22750	23034	22408	17635	15589	16522	17442	13039
684	32836	28953	32687	32585	25979	27975	21502	24180	23604	21880	19810	21055	18261	19591	18167	19934	16032	16534	15212	15801	56329	52418	43864	40362	38551	32936	28281	30176	27877	24486	26091	23655	24151	23800	30672	19834	18100	18456	17335	17188	23960	22528	22570	22514	17642	16026	16468	17354	14174
687	32692	28569	32514	32524	26082	28955	24057	23699	22542	21358	19229	20942	17765	19338	17949	19896	16127	15799	15219	15917	56474	52400	44505	41258	38359	32671	27872	29993	27610	25276	25839	23707	24180	23679	30176	19320	18228	18626	17463	17879	23779	22613	22044	22649	17244	15788	16377	17740	13522
690	33425	28954	33538	32323	25989	29193	24020	23365	23004	22115	18674	20476	18146	19545	18477	19619	16568	16499	15034	15625	55238	52013	44334	40935	37776	32794	28843	30453	28103	24979	26804	22837	24004	23870	30909	19041	18796	18845	16916	17129	23288	23413	21792	22084	17083	16039	15878	17920	13717
693	32498	29742	31622	32166	25515	28189	23655	23876	23013	21492	19452	21818	17730	19246	18004	20257	16480	16098	15427	15735	55663	53102	45857	41130	38538	33452	27252	30857	27746	25099	25989	23855	23962	23940	30884	18944	18286	19077	17062	17352	23890	22343	22394	21512	17418	15701	16448	17801	13705
696	32224	29467	31479	32237	25635	28223	25349	23077	22872	21519	19885	20468	17456	18515	18456	19877	14943	15933	15493	15876	55486	52873	44644	41460	37958	33311	27687	30249	27159	25104	26591	23193	23914	23719	30622	18374	18305	18146	17495	17409	23860	22802	22103	21791	17972	16276	15955	18178	13526
699	32777	28846	33547	32774	25741	28211	24469	23285	22490	21579	20350	20505	17962	19903	18621	19117	15624	16705	15187	16438	55562	52266	44906	41216	37654	33541	29173	29935	27673	24097	25775	23278	24320	23508	30584	18495	18382	18563	17005	17054	23862	22445	22087	22235	17701	16112	16845	17452	13063
702	33068	30486	32539	33574	26340	28732	25032	24436	23457	21510	20132	20577	17517	18916	17548	19955	15104	15815	16092	16086	56348	53132	44389	41047	38148	32870	27158	29863	27450	24744	25797	23827	24604	23877	30020	18719	18268	18875	16814	17240	23467	22622	22282	22040	17766	16698	16363	18201	13985
705	32241	29306	32445	32291	26414	28201	24753	23871	22774	21438	19785	20788	17639	19388	17728	19920	15462	15821	15904	15903	56455	52457	44304	41252	38667	33869	28830	29965	27855	25019	26482	23568	24148	23940	30259	18396	18046	18680	17764	17132	24282	22674	21990	22320	17640	16022	16492	17343	13854
708	32066	29489	32987	32519	25737	29105	25121	23619	22313	21312	19110	20592	17202	18245	18209	19492	15557	16260	15248	16329	55430	51405	44534	41552	37626	33193	29808	29892	27330	24886	26436	23735	24540	23497	30277	19003	17829	18907	16960	17333	24349	22645	22792	22259	17754	16006	16484	17832	14350
711	33038	29930	33086	32353	26167	27556	24551	23529	22125	21006	19900	20008	17378	18270	18748	19285	15327	16051	15513	16208	55985	52618	44213	41191	37425	33175	28361	30182	26620	25703	26428	22960	23575	23110	31079	18433	18337	18576	17413	17233	24029	22381	22585	21908	17326	16480	16534	17804	13650
714	33095	29677	32421	32613	25726	28691	23599	23635	22854	21139	18985	20805	16933	18402	17867	19786	15838	16619	15428	15662	56122	51476	43451	40996	37684	33454	30082	30135	27620	24316	26151	23981	23952	23341	30832	18824	18465	18635	17497	17643	23347	23003	22095	21620	17996	15843	16509	17200	13963
717	33130	29333	32362	32138	25610	28557	25007	23507	22994	21963	19916	21009	17569	18494	18626	19720	15389	16565	15556	15921	55838	52778	44061	42174	38194	33621	28380	29622	27256	25100	25459	23645	24841	23078	30629	19207	18824	18861	17046	17861	23390	22263	22677	21719	17603	16436	16319	18212	13241
720	32578	29783	32514	31707	25593	28263	23956	23369	22949	21715	19319	21074	17618	19069	17951	19330	16132	15696	15055	15892	55452	51691	44813	41128	37530	33647	29728	29241	27220	24577	26446	23336	24113	23500	30875	18815	18269	18967	17170	17597	23679	21923	22195	22102	17048	15427	16820	17254	12890
723	33389	29815	32104	32359	25589	29177	23408	23491	23363	22229	19320	21411	18279	19017	18442	19685	15902	15978	15941	15903	56549	52383	44311	40850	37827	34107	26144	30339	27328	24950	25927	23579	23480	23663	31329	19161	18184	17905	17220	17168	23804	21966	21873	21508	18061	16329	16415	17241	14056
726	32562	29079	32474	31724	26015	28386	23670	23125	23614	22009	19857	20722	17957	19333	17878	19366	16362	16472	15710	16291	56295	51802	44206	40822	38022	32926	28532	29757	28048	25450	26379	23902	24089	24645	31105	19201	18157	18812	17305	17571	23356	22145	22545	21626	17171	15948	16256	17282	14021
729	32569	29562	32429	32447	26343	28294	23517	23541	23189	22315	17993	20967	18199	19027	18027	20514	16267	16029	15750	16271	54923	52087	43944	40743	37778	33567	28242	29506	27762	24979	26540	23598	24107	22923	30962	18155	18232	18780	17679	17484	23718	21886	22110	21828	17897	16133	16364	17395	14259
732	33114	30342	33550	31516	25993	27523	23825	23225	23082	21881	19096	21006	18208	19655	18621	19109	15735	16054	15803	16463	55979	51495	44901	40993	37189	33216	30265	29390	27377	24980	25781	23682	23906	24080	30353	18579	17742	19027	17189	17436	23281	22277	22266	22230	17727	16292	16685	17965	13644
735	32625	29877	32226	31279	25744	27776	24604	23773	22762	22731	18967	20472	17658	19713	18192	20563	16073	16642	16209	15945	56927	52005	43687	40917	38326	33444	28296	29956	27936	25529	25892	23674	23532	23598	30935	18462	18675	18753	17180	17145	23604	22433	21313	21615	17483	16268	16212	17050	13899
738	32887	30295	33120	32701	26253	28358	24603	23495	22623	22230	19252	20608	18173	19171	18502	19989	16577	16158	15472	16227	56047	52099	44666	40548	37849	33175	29174	30452	28031	25223	25481	23970	24094	22620	31147	19095	18520	18754	17269	17816	23850	22347	22347	21722	17373	15990	16217	17938	13600
741	32919	29846	32741	32268	26556	28164	23942	22950	22672	21663	19908	20398	17992	19621	18486	19475	16457	16451	15895	16337	55299	52744	43916	40088	37670	32980	29544	30179	28323	25209	25937	23626	24233	23869	30168	19105	18387	18780	17784	17308	23604	22410	21942	21387	17767	15848	16527	17800	13547
744	33578	29791	32754	33104	25855	27351	23777	23639	22553	21812	18848	20708	18317	19909	18441	19679	16274	16267	15442	15492	55535	52930	44366	40282	37391	33308	29235	30460	27545	24631	25240	22919	23946	23735	31373	18728	18650	18607	17090	17503	23377	22720	21746	21705	17297	16076	16384	17775	14155
747	33237	30458	33871	32890	25781	28508	25007	22693	23298	21724	20079	20807	18134	19989	18579	19660	16563	16402	15481	16346	57086	52301	44386	41826	37825	34211	28645	29805	27121	25469	26249	23609	24085	23781	30751	18258	18272	18156	17021	17250	24088	21746	22623	22513	17073	16358	16282	17956	13492
750	33060	29679	32375	33168	26470	28920	23998	23505	23349	21241	19522	20899	17829	19304	18456	19731	15904	16484	15921	16012	55670	53113	43793	42006	37909	33787	26959	30099	27244	25375	25882	23935	24544	24063	30363	18551	18888	18562	17016	17173	23361	22347	22963	21925	17993	15379	16881	18250	14190
753	32934	28970	32787	32724	25089	28531	24102	22974	22791	22305	18570	20403	17837	19442	18577	20421	16397	16792	15924	16430	56365	52218	44595	41082	37102	33524	30597	30249	27888	24637	25773	23830	24451	23611	30954	18196	18323	18071	17563	17068	23966	22255	22170	21984	17360	16634	17282	18141	13594
756	33125	30339	32764	32632	25995	28027	24304	23413	22720	22230	19398	21373	18655	19122	18409	19622	16117	16889	15449	16048	57496	52087	44944	41348	37866	34063	28508	29739	27753	25184	26195	23627	23591	23771	31064	18354	18500	18758	17462	17951	23291	22555	22503	21910	17250	16462	16038	17550	13268
759	33529	30326	32509	33118	25318	28051	22774	22889	24235	21477	19934	20682	18221	19554	18293	19469	16051	16489	15481	16185	55249	52439	43703	41448	38499	33233	29359	29535	27648	25130	26594	23623	23824	23839	31105	18593	18154	19352	17382	17536	23595	22906	22302	22324	17774	16809	16412	17801	13506
762	32676	30199	33279	33091	25214	28734	23689	22986	23068	21957	19427	20951	18084	19395	18763	19821	16103	16267	15797	16238	55473	52472	44964	42239	38013	33641	30120	29982	27377	24934	25998	23841	24227	23452	31630	18610	17964	18514	17781	17528	22933	22080	22311	22155	17109	16038	16465	17737	14050
765	33512	31148	33378	33124	25739	29039	23331	22202	23107	21973	18941	20201	18285	19316	18126	20338	15863	16483	15277	15745	55927	51271	43600	40953	37378	33474	29781	30076	26753	25070	26301	23743	23346	23085	31380	18536	18502	18753	17932	17290	23269	22976	22738	22327	17677	16629	16424	18020	13705
768	33728	29972	33122	32776	25909	29395	24070	23647	23305	22464	19806	20578	18042	19988	18066	19133	15847	16463	15760	16300	56565	51711	43560	41484	37388	33007	27371	30558	27911	25123	26206	23433	23923	23512	31204	18892	18086	19001	17161	17794	22977	22129	22328	21408	17363	16243	16625	17358	14257
771	33428	29605	32989	33200	25746	29192	24130	23207	23313	21328	19702	20985	18127	19415	18316	19717	16353	16750	16156	15704	55988	52391	42995	41734	38222	33340	31021	30014	27823	24775	25927	23248	24068	23384	31161	18761	18346	19001	17408	17204	23299	21757	22880	22168	17494	16335	16650	18390	14219
774	32500	30714	33875	32235	26162	29660	24907	23710	23255	21569	20154	20834	17941	18343	18341	19953	14960	16073	16175	16353	56063	51343	43065	41586	37278	33675	29306	30030	27534	24832	25514	23992	24231	24357	31206	19632	17952	18768	17992	17212	23309	22973	22611	21422	18166	16203	16493	16925	14070
777	33113	30119	33209	32539	26130	28751	24850	24418	23120	21352	19631	20631	17792	19238	17875	19978	15990	16321	15654	16381	56356	52090	44323	40461	38545	33773	30985	29802	27534	25719	25793	23500	23436	24808	31418	19163	17874	18729	17177	17202	23716	22506	22133	21456	17531	16218	16941	16656	13314
780	32840	30441	32355	32888	26253	29577	24109	23182	23679	21739	19451	20704	18055	19458	18490	20188	16271	16577	14855	16042	56267	52236	43640	40147	38323	33665	31027	30576	28067	25691	26387	23507	24063	24218	30347	19049	18371	19002	17840	17524	24072	23003	22662	21660	17378	16517	16573	17068	13980
783	32790	30736	32870	32971	26375	29110	24053	23672	22434	21523	19475	21293	17735	19632	18428	19865	16025	16180	16178	16229	55847	51575	45682	41387	38174	33716	29233	30167	27192	24835	25703	23517	24562	23826	31500	18302	18194	18923	18025	17554	23121	22529	22414	21716	17893	16846	17128	17159	14023
786	33173	30164	33095	33639	25834	28277	23659	23759	23133	22502	19010	20830	17979	19521	18678	19412	16294	16009	15880	16705	55938	51614	43469	41149	38383	33497	30484	29884	27498	25067	26953	23234	23827	22965	31485	19172	18465	18378	17638	17343	24157	23480	22035	22080	17712	16957	17192	17817	13873
789	33528	30150	33232	33765	26499	28388	24503	23361	23107	21699	20330	20857	17369	19689	18603	19565	16327	16124	15590	16121	55534	52103	44091	41734	38121	32916	29629	30791	27248	24899	26338	23449	24762	23057	31218	19331	18452	18992	17724	17695	23940	22751	22178	21817	17747	16224	16331	17494	13656
792	32900	30170	32870	33199	25719	28989	23191	22993	23015	22123	19150	20509	18789	19382	17924	20308	16348	16451	15566	15919	55800	51616	44553	40479	37493	33804	31618	29439	27250	25047	26641	23868	24185	23375	31124	18715	19013	18571	17623	17261	23253	23038	22531	22789	17734	16243	16131	17869	13622
795	32315	30346	33712	33259	25460	29372	23570	23730	22578	21201	19728	21280	18251	19458	19003	19191	16766	16518	15133	16073	56651	51879	43840	40988	37933	33165	28386	30665	27921	25113	26502	23918	24272	23385	30935	18225	18089	18509	17471	17176	23865	22247	22479	21717	17067	16443	16590	17898	13891
798	33387	30424	33843	32224	26130	27977	24247	23949	22843	22309	20506	20629	18338	19951	19059	19215	16069	16617	15823	15722	56851	51690	43399	41684	38541	33685	30626	30101	27394	25901	25860	23534	24412	23294	30562	18509	18776	18696	17658	18051	23291	23029	22239	21634	17410	16715	17124	17607	13621
801	32583	30722	33264	33495	25779	29075	23737	22684	23676	22482	19343	21177	18246	19431	18717	19980	16285	16601	15974	16059	55374	51973	44445	40989	38514	33263	31734	30566	27299	24776	26382	23660	23698	23763	31340	18223	18386	18814	17639	17597	23075	21995	22408	22336	17220	16405	16398	17267	14291
804	33002	29941	33619	34252	25815	29611	23208	24104	22520	21641	19805	21164	17936	19922	18320	19611	16067	16332	16229	15897	56095	52838	44746	41259	37935	32727	32094	30142	26711	25094	26453	23808	23886	24061	31681	18522	18685	18894	17407	16801	23583	22814	22091	22230	17597	15819	16562	17806	13800
807	32882	31082	33375	33185	26229	28095	24433	23193	22836	21860	19944	21433	18369	19522	18867	20607	15988	16495	15419	16660	55735	51974	43603	41888	37746	33987	29888	30074	26940	25112	26348	23337	24439	23704	30990	18793	18404	18725	17387	17335	23118	22151	22505	22775	17261	16199	16207	18037	13725
810	32395	29873	33510	33308	25849	27578	24021	23751	22829	21852	19558	21103	18207	19621	18246	20204	16424	16216	15423	16516	56202	52170	44993	41243	38303	33273	27794	29910	27174	25081	26384	24013	23941	23824	31205	18766	18844	18682	17374	17474	23466	22316	21860	21832	17638	15779	16574	17954	14191
813	33366	30752	33757	33760	26656	28574	23527	23889	22879	21570	19071	21103	18359	19549	17960	19873	15881	16767	15994	16152	56603	52746	44116	40920	37476	34197	31470	29465	27684	25218	26375	23349	24531	23506	31351	18643	18432	19042	17777	17369	23209	22589	22735	22378	16985	16106	16295	18217	13944
816	33062	29948	33948	33891	26344	27525	23329	23016	22875	21806	20081	21576	17739	19448	19321	19674	16017	16422	15933	15584	56027	51852	43599	42216	38249	33454	27537	30135	27548	25143	26309	23226	24471	23602	30983	18451	18461	18231	18181	17734	23925	22007	22935	21928	16938	15932	16184	17863	13896
819	32582	30679	33824	33135	25933	28122	23846	23803	22770	22817	19961	21407	17831	19411	18066	19375	16598	16228	15914	15554	55163	51507	44670	41424	37767	33798	30571	30354	27263	25372	26324	23213	24759	23743	31675	18275	18333	18638	17197	17531	23412	22235	21869	22271	17756	15429	16207	17806	14102
822	32820	30541	33895	33920	25179	28433	23755	22612	23399	21610	19877	20908	18338	19653	18933	19673	16298	16574	16075	15883	56167	52259	44467	41988	38418	33382	29390	30029	27544	25183	26590	23890	24703	23251	30698	18737	18381	18859	17703	17142	23337	22813	22582	22237	17851	16030	16618	18401	13557
825	32535	29977	33637	33156	25965	29829	23833	23975	23593	22264	19572	20645	18330	19626	18445	18992	16208	15891	16048	16296	56527	51838	44638	40174	37987	32884	29949	29776	27417	25536	25787	23566	24742	23657	31324	18348	18652	18613	17545	17275	23016	22413	22568	21934	17585	16065	16437	17719	14114
828	33864	30957	33115	32954	25514	28927	22979	23161	22538	22493	19245	20737	18074	19834	18847	19606	16232	16733	16161	16754	56568	51478	44181	41650	38023	33005	29779	30023	27612	25188	25921	23263	23719	24455	31164	18285	18209	18891	17691	17591	23420	22970	22508	22163	17729	16237	16400	17621	13964
831	33060	29575	33088	33711	25639	28469	24497	22728	22986	21956	20180	20523	17687	19438	17599	19551	16127	17157	16191	15793	55980	51971	44440	41424	37995	33602	28719	30623	27641	25472	26918	23770	24478	23987	31532	18329	18474	18699	17556	17249	23872	22970	22228	21960	17549	15707	16380	18048	14799
834	34096	30964	34231	32687	26140	28783	24468	23938	22711	22200	20181	21293	18248	19219	18723	19549	16280	16625	15787	15572	56192	51987	43356	40885	38189	33913	32106	29392	27736	25022	26505	23407	24452	24116	31363	18567	18254	18597	17945	17613	23921	22808	23471	22089	17423	15848	16000	17319	13589
837	33597	30655	33979	33229	26559	28122	24963	24673	22737	22794	20409	21391	18109	19135	18400	19487	16601	16600	16094	16091	56282	52146	44004	40727	37713	33407	28016	30644	27307	25117	25976	23769	23888	23774	30820	18740	18338	18588	17577	17652	23625	22318	22588	22253	17415	16202	16254	17214	14058
840	34189	29987	34157	32051	26522	28113	24271	24438	23237	22373	20225	21192	18567	19637	18709	19754	16521	16637	16045	15657	55340	52217	44380	40919	37455	33306	30587	30438	26743	25886	26578	22638	24018	24412	30873	18398	18438	19101	17982	17597	23673	22581	21938	22519	18068	16531	15896	17598	13628
843	33682	30734	33402	34042	26608	27915	24530	23221	23208	21921	19711	20870	18300	18774	18755	20020	16477	16094	16081	15863	55707	51671	44304	40741	37960	33648	31543	30132	26261	25052	26378	22965	24172	24263	32018	18136	17984	18700	17620	17511	23190	22806	22741	22511	17629	15793	16288	17181	13751
846	33911	30634	34660	33541	26484	28229	23812	23581	22978	22297	20148	21163	18126	19932	18890	19467	16452	16489	15685	16395	56134	51827	44176	41143	37855	33533	29021	29501	28147	25407	26334	23187	23635	23981	31986	18223	17857	18899	17916	17463	23551	22662	21988	22690	17014	16131	16007	17558	13676
849	33364	31282	34553	34024	26428	27802	23618	23950	22728	22178	19668	21220	18647	20310	19017	19625	16451	16460	16287	15900	57059	51864	44823	41381	37736	34077	30352	29271	26997	25482	26694	23949	24450	22793	32109	18236	18365	18736	17814	17595	23772	23268	22914	21634	17794	16366	16179	17517	14008
852	32857	31135	33787	33633	25874	28346	23899	24273	22272	22472	20156	21519	18358	19736	18785	19354	16271	16127	15958	15933	57008	51575	43608	41244	38052	34339	30999	29561	27638	25776	26199	23941	24557	24607	31167	18299	18409	18885	17133	17914	23974	22636	22291	22956	17702	15777	16439	17834	13628
855	34070	30753	33537	33948	25698	28394	23571	24241	23624	22108	20456	21051	18017	19618	18096	19744	16312	16034	15586	15889	56405	51916	44423	40876	38329	33957	33443	29506	27396	25071	26857	23312	24307	23375	30889	18203	18531	19254	18012	18083	23806	22599	22505	22148	17638	16366	16353	17445	13974
858	33947	31047	34558	33703	26027	28875	23773	23755	22622	22249	19481	21758	18785	19334	18529	20403	15801	16400	15784	15944	56496	53400	44145	41343	37857	33220	31927	29392	27079	25298	25823	22986	24034	23949	31511	18072	18304	19153	17808	17255	23133	22725	22232	22292	17134	16405	16665	17771	13101
861	33753	30169	34570	34185	26184	28716	24261	23523	23043	22532	20069	21517	18361	19242	18348	19617	15824	16118	16011	16561	56125	51842	44057	40884	38180	34309	33156	30698	27426	25084	25827	23359	24081	23663	31496	17882	18535	19045	17395	17503	24221	22134	22395	22524	17443	15993	15996	17702	13712
864	33850	30096	34724	33433	26196	27901	24665	23626	22948	22383	20203	21562	17703	19342	18724	20261	16526	16535	15683	16135	55627	51413	44658	41462	38326	34036	32095	29927	27172	25312	26476	22908	24401	23389	31092	18631	18097	18588	17038	17120	23618	23052	22427	23062	17766	16398	16564	18410	14050
867	33842	30307	34652	34786	25625	28991	23423	23599	22708	22186	20045	20198	18321	19898	18552	19515	15743	15943	15865	16260	56152	51615	44099	41666	37481	34033	35050	29868	27522	25027	25833	23476	24002	23460	31374	18316	18826	19506	18012	17282	23481	22164	23137	22652	17423	16271	16364	17644	13751
870	33763	30918	33911	32551	26048	28949	22864	24106	23052	22910	20080	20962	17964	19308	18720	19802	16153	16515	16045	16293	55487	51966	43828	40986	38810	33519	28656	30066	27697	25614	26887	23342	24214	23660	31253	18519	18340	19387	17483	17159	23601	22251	22393	22465	17149	16051	16490	17756	13839
873	33892	30513	33936	34028	25839	28497	23741	23707	23048	22912	19617	21366	18089	20165	18288	19996	16472	16482	15927	15613	55464	52565	43539	41008	37335	33197	30831	30368	27741	25538	26272	23920	23714	23721	31238	17647	18891	18962	17779	17649	24032	21813	22198	22797	17664	16168	16633	17813	14228
876	33166	31370	34070	34115	25903	28179	24195	23635	23018	22548	20012	21812	18446	19689	18287	19981	16599	16425	16161	16153	55425	51650	43158	40335	37965	33889	31714	30214	27076	25168	26730	23302	23934	23432	32064	18570	18847	18718	17855	17232	24396	22914	22937	22287	17468	15985	16788	17810	13964
879	33328	30549	34587	32946	26346	29026	25863	23913	23074	21870	20366	21707	18985	19517	18278	19734	16430	17138	16237	16229	56271	51355	43921	41806	38648	33826	29835	30385	27781	25086	26313	22992	24083	22762	32345	18743	18270	18973	17611	17318	23508	22267	22657	22190	16506	16324	16433	17655	14075
882	33472	29921	33616	33894	26808	28388	23299	24619	23034	22727	20447	21652	18291	19360	18771	20004	16062	16128	15540	16062	56739	51538	44721	41014	37910	34405	30196	30440	27442	24831	26392	22769	24149	22948	31652	18168	18846	18991	17885	17589	23475	22737	22140	21959	17282	16644	16401	18012	13810
885	34265	30873	34379	33026	26333	29807	24011	24864	23286	21797	20859	21046	18567	19755	18693	19447	16399	16518	15813	16059	55482	52281	44386	40603	37702	33052	30592	29317	27116	25654	26929	23285	24153	23166	31178	17896	18441	18712	17838	18089	24141	22419	22876	22480	17961	16271	16153	17647	13710
888	34149	30659	34385	34112	25662	28164	24152	25128	22626	22903	21153	21590	18308	20146	18262	20307	16056	16210	15858	16462	56326	51690	43645	42172	38264	33324	32366	30843	27158	25314	26694	23346	24021	24224	31145	18523	18442	19182	18268	17635	24425	22181	22350	22558	17244	15749	17052	18170	14256
891	33591	30403	34464	34472	26419	28678	24875	23688	22769	21851	20335	21639	18213	18957	18861	19931	16246	16246	15125	16544	55836	51306	44229	40781	37769	33556	30336	30329	26923	25191	26385	23877	23970	24263	31514	17617	18091	18978	18289	17612	23794	21913	23288	22105	17152	16495	16535	18774	14079
894	34495	30964	34175	34647	25738	29144	24005	23256	22916	22394	20061	21077	18832	19266	18534	20782	16503	16688	15580	15828	56611	51608	44241	41951	38591	33897	31233	29919	27345	25095	26735	23810	24298	23358	31476	18055	18580	18623	17806	17578	24381	22154	22594	23151	17301	15465	16722	17628	13962
897	33980	30013	34715	34038	26078	29584	23909	24290	23122	22199	19908	21605	18722	19265	18976	19569	17006	16289	15618	15986	56532	52464	45036	41561	37564	32677	30618	29915	27314	25332	26641	23181	24542	23501	31068	17907	17597	19183	17633	17264	23874	22402	22169	22340	17365	16287	16258	17593	14021
900	33957	30830	35279	34266	26236	30561	23982	24033	23683	22518	20454	21011	18153	19195	19243	19660	16002	16416	15861	15662	55897	52299	43630	42350	37659	32719	32699	29897	27236	25221	26032	23507	24775	23354	31488	18461	17845	18018	17579	17771	23705	22836	22569	22940	17657	16746	16097	17008	14080
903	34080	30697	34226	33694	26643	29536	24754	23796	23062	22653	20825	21254	18502	19493	18383	19927	16479	16130	15966	16022	56626	52844	44121	41620	37852	33588	31061	29675	27264	24856	26016	22621	24392	24057	30942	18303	18746	18747	17880	18347	23849	22378	22906	22365	17109	16427	16488	17337	14090
906	35162	30484	34637	33499	26327	29084	24434	23998	23720	22377	20770	21591	18836	20144	18964	19809	16312	16840	15397	16309	55479	52647	44203	41791	38627	34309	30800	29611	27094	25167	26065	23873	23836	24318	31253	17850	18180	18563	17967	17734	23983	22248	22750	22525	17032	16205	16737	17195	14577
909	33398	30846	33403	33033	25873	28452	25156	23807	22538	22161	20637	21605	18461	19458	18340	20064	16452	16860	15911	16093	55814	51121	43599	41372	37482	33316	31654	30029	27224	25203	26780	23958	24419	23529	31632	18216	18682	19036	17951	17182	23962	22588	22435	22601	17372	16341	16474	17186	14098
912	33586	30269	33804	34367	26943	28755	23561	24539	23461	22457	20018	21487	18467	19856	18639	20721	16888	16163	15742	15890	56943	52736	44136	41066	37969	33620	30304	30043	27327	25558	26705	23328	24085	23223	32021	18609	18661	19381	18389	17325	23500	22156	22879	22787	17570	16335	16585	17467	14471
915	34004	31397	34672	33003	25915	29389	24327	23564	23556	22621	19402	20829	17989	19619	18946	20095	16332	16565	15193	16771	56655	52005	44812	41409	38542	33844	29665	29703	27550	25130	26232	23484	24200	23294	32175	17287	18553	18860	17818	17061	23528	22413	22437	22157	17562	16665	16363	17662	14209
918	33761	31203	33725	33062	26213	28558	25158	24451	23619	22493	20178	20849	18165	19415	19136	20101	16044	16207	15191	16600	55996	52272	44362	41165	37711	33259	29468	29645	27605	25462	26242	23689	24022	23399	31236	18037	17999	18943	17602	17490	23729	22294	23042	22646	17542	16028	16202	17862	14271
921	34741	31296	34082	32708	26181	28858	26272	23846	23647	22921	20565	21578	18212	19459	18300	19944	16240	16430	16168	16304	54655	53022	43809	41951	38023	34003	30466	29870	27513	25070	26660	23017	23945	23429	31918	18109	17796	18846	17934	17552	22850	22533	22786	22571	17082	16031	16697	17087	14270
924	34248	30906	33204	32079	26350	28704	25086	24094	23975	22959	20928	20904	18147	19381	18766	20803	16322	16251	15692	15738	56167	52727	43883	41450	38080	33072	31843	29771	27097	25253	26569	23120	24284	24312	31814	18406	18440	18657	17472	17275	23842	22946	22316	22623	17194	16398	16356	17130	13748
927	33482	31026	34839	34608	26567	30096	25516	24128	23432	22735	20334	21473	18121	19098	18598	20202	16089	16442	15818	16426	55988	52905	45100	41712	38272	32824	27670	29245	28112	25082	26222	23451	24433	22877	30890	18732	18367	19741	17926	17315	24032	22791	23259	22432	17366	16710	16729	17759	13863
930	35421	30312	34871	33172	26136	28461	24744	23813	23295	23125	19706	21666	18463	19956	19272	20094	16110	15818	15527	16605	56658	52351	44089	41449	38325	33530	32277	28889	27275	25221	25957	23237	24701	22320	31569	19154	18626	19278	17725	17279	24318	22220	22637	22204	17227	16139	17251	17389	13671
933	33744	30312	34318	34317	25634	29345	25603	23545	23549	21688	20159	21316	18431	19446	18598	19799	16151	17251	16627	16769	56646	51570	45053	41188	37695	33505	29659	30103	26495	24763	26611	23197	24171	23290	32063	18095	18755	19331	17663	17785	23994	23120	22374	22143	17479	15616	16444	17573	13815
934	34780	30401	34836	32352	26730	30041	24635	24139	23537	22683	20191	21201	18385	19461	18497	19820	15929	16726	15996	16599	54908	50937	43162	41453	37810	33187	31385	30500	28017	25419	25935	23256	24024	23168	31292	18357	18433	18501	17980	17586	23798	22532	22694	22244	18084	16855	16287	17558	13550
935	34025	29853	34070	34790	26305	30455	25690	24618	23567	23008	20205	21114	18704	19563	18637	20092	16388	16569	15684	16213	55920	52668	44432	41445	37931	33705	30001	29924	26917	25271	26343	23503	23540	23687	31761	18305	18630	19127	18310	17284	23845	23111	23272	22417	17614	16233	16829	17442	13562
936	34888	30924	34530	33124	26820	29084	23978	24202	24138	23031	21026	21732	18483	19764	19119	20815	16384	16976	15604	16073	56133	52761	43789	41883	37763	33636	28538	29803	27445	24877	26301	23441	24177	22857	31492	18767	18642	19115	17859	18102	23858	22266	23204	22367	17195	16368	16357	17475	13888
937	34343	31108	35234	33071	26527	29207	24719	24366	23683	22331	20067	21593	18421	19765	19003	20917	16644	16394	15532	16042	56122	52043	44244	41888	37113	33744	28415	30069	27526	24485	26457	24644	23940	23646	31776	18076	17733	19040	17974	17702	24238	22838	22862	21955	17181	16315	17338	17882	14068
938	34759	31760	35525	34495	26371	29022	24638	24472	23196	22637	20705	21449	18674	19892	18853	20708	16103	16335	16357	16290	56524	51402	43886	41616	37326	34257	29338	30381	26556	24817	25913	23589	24442	23784	31458	18978	18860	19112	17374	17679	24406	22674	22997	22273	16901	15768	16528	17776	13599
939	34089	31183	34587	34365	26787	28453	23848	24146	23083	22696	20183	21572	18080	19546	19131	20343	15665	17017	15722	15781	56388	52404	44068	41525	37689	33169	29263	29997	26797	25124	26885	23895	24291	24363	31030	18511	18365	18853	18105	17796	23283	23022	22258	22707	17473	15990	17135	17930	13840
940	34450	31119	34208	34178	26632	28322	24454	24488	23995	22648	20441	21712	18691	20117	18898	19981	16488	16351	16261	16484	56151	53502	43803	41933	37893	33522	29872	30417	26441	24623	25958	23967	24577	24024	31971	18453	18014	18766	17598	17908	24713	22984	23135	22680	17691	15921	16553	17928	13969
941	35259	31672	34376	33661	26497	28259	25080	24128	24026	21945	20402	21998	18213	19951	18845	20637	16032	16796	15725	16585	56177	52436	44574	42042	38242	33291	29516	29829	27444	24897	26702	23894	24520	24031	31697	18904	18909	18861	18634	18015	23768	22266	22653	22291	17957	16261	16627	17580	14051
942	34191	31576	35737	34733	26939	28512	24989	23870	23473	22694	20170	21317	18983	20043	18809	19923	16361	17072	15596	16188	56445	52217	44599	41554	38270	33294	30413	29344	26987	25077	26538	23649	23747	23428	31252	18514	18447	19233	17738	17523	23570	22628	22294	22356	18003	16049	16344	17657	13740
943	34099	31516	34805	33552	27253	29652	25062	24151	23660	21970	21041	21902	18707	19530	18568	20615	16200	16367	16114	16348	55831	52689	45669	42297	38313	33256	29016	30557	27881	24916	26114	22994	24104	24395	31354	17077	18187	19465	18167	17581	24186	22344	22788	22574	17445	16600	16812	17335	13873
944	34269	30853	34405	33800	26092	28769	24688	24339	23521	23002	20560	21990	18615	19946	18657	20890	16146	16158	15604	16431	55852	52028	43722	41600	38592	33383	29803	29564	26343	25201	26582	23919	24484	23544	31822	18694	18268	18925	17705	17859	23831	23011	22717	22844	17175	16239	16581	17921	14151
945	34512	30823	35317	32956	26529	28689	25140	24101	23901	22615	20366	21307	18528	19651	19212	20334	16234	16763	16212	16286	56200	52571	43446	41229	38313	33599	29010	29347	27311	25246	26194	23416	24230	23137	31817	17686	18048	19044	18125	17975	23851	22255	22776	23187	17816	15702	16777	18200	14220
946	33674	30973	34493	32352	27177	29552	24902	24552	24237	22767	20716	21492	18185	18741	19009	19965	16757	16452	15376	16379	55568	51807	44174	40392	37837	33996	30057	30288	27186	25323	26327	24330	24328	23254	31296	18511	18906	18936	18350	17403	23903	22696	22567	22719	17960	16508	16687	17377	14225
947	34490	32056	34379	34689	27336	28748	25678	23865	23963	23120	20407	21287	18382	19383	19316	21168	16406	16346	15690	16015	55611	52187	44293	41572	38476	33759	30482	30235	26992	25138	25928	23859	24383	23394	31588	18749	18789	18985	17686	18106	23930	22481	22463	22870	17406	16795	16469	17319	13928
948	34866	31217	35480	34618	25604	29124	25817	23779	24213	23235	20241	20971	18418	18932	19189	20203	16335	16802	15751	16233	57025	52427	44460	41458	38202	33360	28476	30440	27262	25090	26079	23740	23883	23587	32284	18536	18342	18889	18336	17509	23951	22393	22501	21931	17549	16061	16390	17354	14751
949	33823	31690	34363	33377	26935	28736	25542	24598	24228	23145	20645	21082	18413	19898	19207	20022	16021	16861	15539	16231	56920	52556	43948	41352	37281	32905	29407	29786	27153	25004	26294	23113	24162	23999	31764	17977	18267	19045	17966	17841	24268	22531	22701	23094	17176	16517	16900	17477	13898
950	34734	32172	36001	33759	27245	29328	25082	24977	24071	22669	20376	21325	18855	20299	19194	20275	16319	16922	15785	16435	55802	53071	45046	41523	37905	33995	29244	30028	27199	25303	26231	23097	24337	23576	31400	18389	18580	19182	18137	18174	23334	23403	23066	22578	17851	16805	16930	17429	13914
951	33742	31361	34651	33191	27255	29178	24631	24385	23172	23061	20498	21443	18724	19198	19248	20427	16654	16604	15566	16629	56958	51915	44837	41875	37643	33483	28494	28883	27393	24477	26613	23754	24529	23852	31782	18776	18907	19617	18229	17792	23974	22618	22833	22610	17799	16570	16771	17483	14106
952	34517	31761	34689	34439	26264	29681	25283	25005	24370	23167	20448	21871	18908	19964	19139	21295	16512	16378	15720	16681	56761	52180	44375	41373	37715	33816	28288	30152	27087	25311	25806	22841	24099	22783	31578	18421	18378	19021	18051	18013	23856	22665	22467	22130	17094	16177	17132	17771	14237
953	34347	32140	35611	34227	26726	28598	25932	24242	23520	22637	20438	21874	18341	19956	18891	21123	15896	16742	15968	16424	56144	52175	44032	41875	37874	33669	28290	29893	27066	25008	26834	23309	24280	23785	32299	17816	18783	19431	18082	18005	23842	23016	22747	22511	17404	16230	16755	18071	13672
954	35001	31505	33811	32187	27164	29369	24977	24666	24784	22786	21537	21843	18923	19703	18306	20564	16225	17099	15900	16417	55511	52279	43199	41169	37966	33456	29937	30441	27129	24878	26654	23103	24021	23834	32136	18956	18739	18846	18218	17871	23680	22503	23140	22773	17637	16512	16715	17239	14360
955	34712	32258	35640	34239	26759	28932	26041	23387	23459	21619	20367	21969	18449	19583	18908	20450	16209	16252	15733	15768	56518	52144	44745	41329	38475	33942	29731	29755	27589	25541	26786	22880	24227	23012	31206	17863	18422	19343	18552	17649	23423	22180	23794	22411	17157	15793	16585	17684	13785
956	34560	31125	35497	34343	26613	29096	25284	24892	23886	23087	21122	21613	18947	18975	18952	20180	16565	16934	16326	16332	55901	52250	44437	41991	38248	34005	28727	30137	27057	25172	26094	22639	24426	23147	31557	18143	18366	19297	17601	17848	24136	22334	22755	22205	18014	16279	16360	17552	14047
957	35134	31504	35177	33828	27491	29018	25381	23993	23756	22306	20778	21934	18042	19974	18478	20984	16471	16736	15824	15891	56569	52233	44522	41451	37801	34101	30107	30053	26947	25356	26426	23256	23879	23067	31853	18303	18266	19071	18026	18278	23515	22124	22786	22849	16785	16642	16811	17460	14595
958	34738	31909	35842	34041	26633	28797	25154	24935	24244	22066	20320	22037	17668	20093	18880	21430	16648	16196	15330	16620	56928	51689	44379	41276	37963	33747	29191	30290	26970	24944	26717	23268	24680	23485	31990	19162	18204	19062	17954	17891	23290	22214	22734	22213	17518	16812	16701	17623	13958
959	33830	31252	34883	35370	27092	29461	25889	25950	23794	23121	20580	22117	18712	19521	18495	21035	16615	17640	16000	16088	55366	52706	44339	42320	38098	33800	29070	29299	27332	24846	26461	23809	23610	23475	31324	19451	17887	18788	18208	17407	23970	23282	22075	22141	16981	16738	16735	16764	14370
[truncated: 154 more columns]
